# Supplementary material for: Optical Evaluation of Dansyl Derivatives and Their Implementation in Low-Cost and Flexible Dye-Doped PMMA Platforms for Efficient Detection of Hazardous Chemical Vapours
Source: Preprints.org preprint supplement (doi:10.20944/preprints202312.1441.v1), 2023-12-19
Supplement: Supplementary file 2 [file supplementary]

Supplementary Materials

Optical Evaluation of Dansyl Derivatives and Their Implementation in ‎Low-Cost and Flexible Dye-Doped PMMA Platforms for Efficient ‎Detection of Hazardous Chemical Vapours

Gonçalo Pedro 1, Frederico Duarte 1, Georgi M. Dobrikov *2, Atanas Kurutos 2,3, Hugo M. Santos 1,4, Jose Luis Capelo-Martinez 1,4, Elisabete Oliveira *1,4, and Carlos Lodeiro *1,4

1 BIOSCOPE Research Group, LAQV-REQUIMTE, Chemistry Department, NOVA School of Science and ‎Technology, FCT NOVA, Universidade NOVA de Lisboa, 2829-516 Caparica, Portugal‎

2 Institute of Organic Chemistry with Centre of Phytochemistry, Bulgarian Academy of Sciences,‎ Acad. G. Bonchev str., bl. 9, 1113 Sofia, Bulgaria

3 University of Chemical Technology and Metallurgy, 8 St. Kliment Ohridski blvd, 1756 Sofia, Bulgaria

4 ROTEOMASS Scientific Society, BIOSCOPE Research Group, Departamental Building, Ground floor Caparica ‎Campus, 2829-516 Caparica, Portugal. ‎

***** Correspondence: Georgi.Dobrikov@orgchm.bas.bg (GD); ej.oliveira@fct.unl.pt (EO) and cle@fct.unl.pt (CL)‎


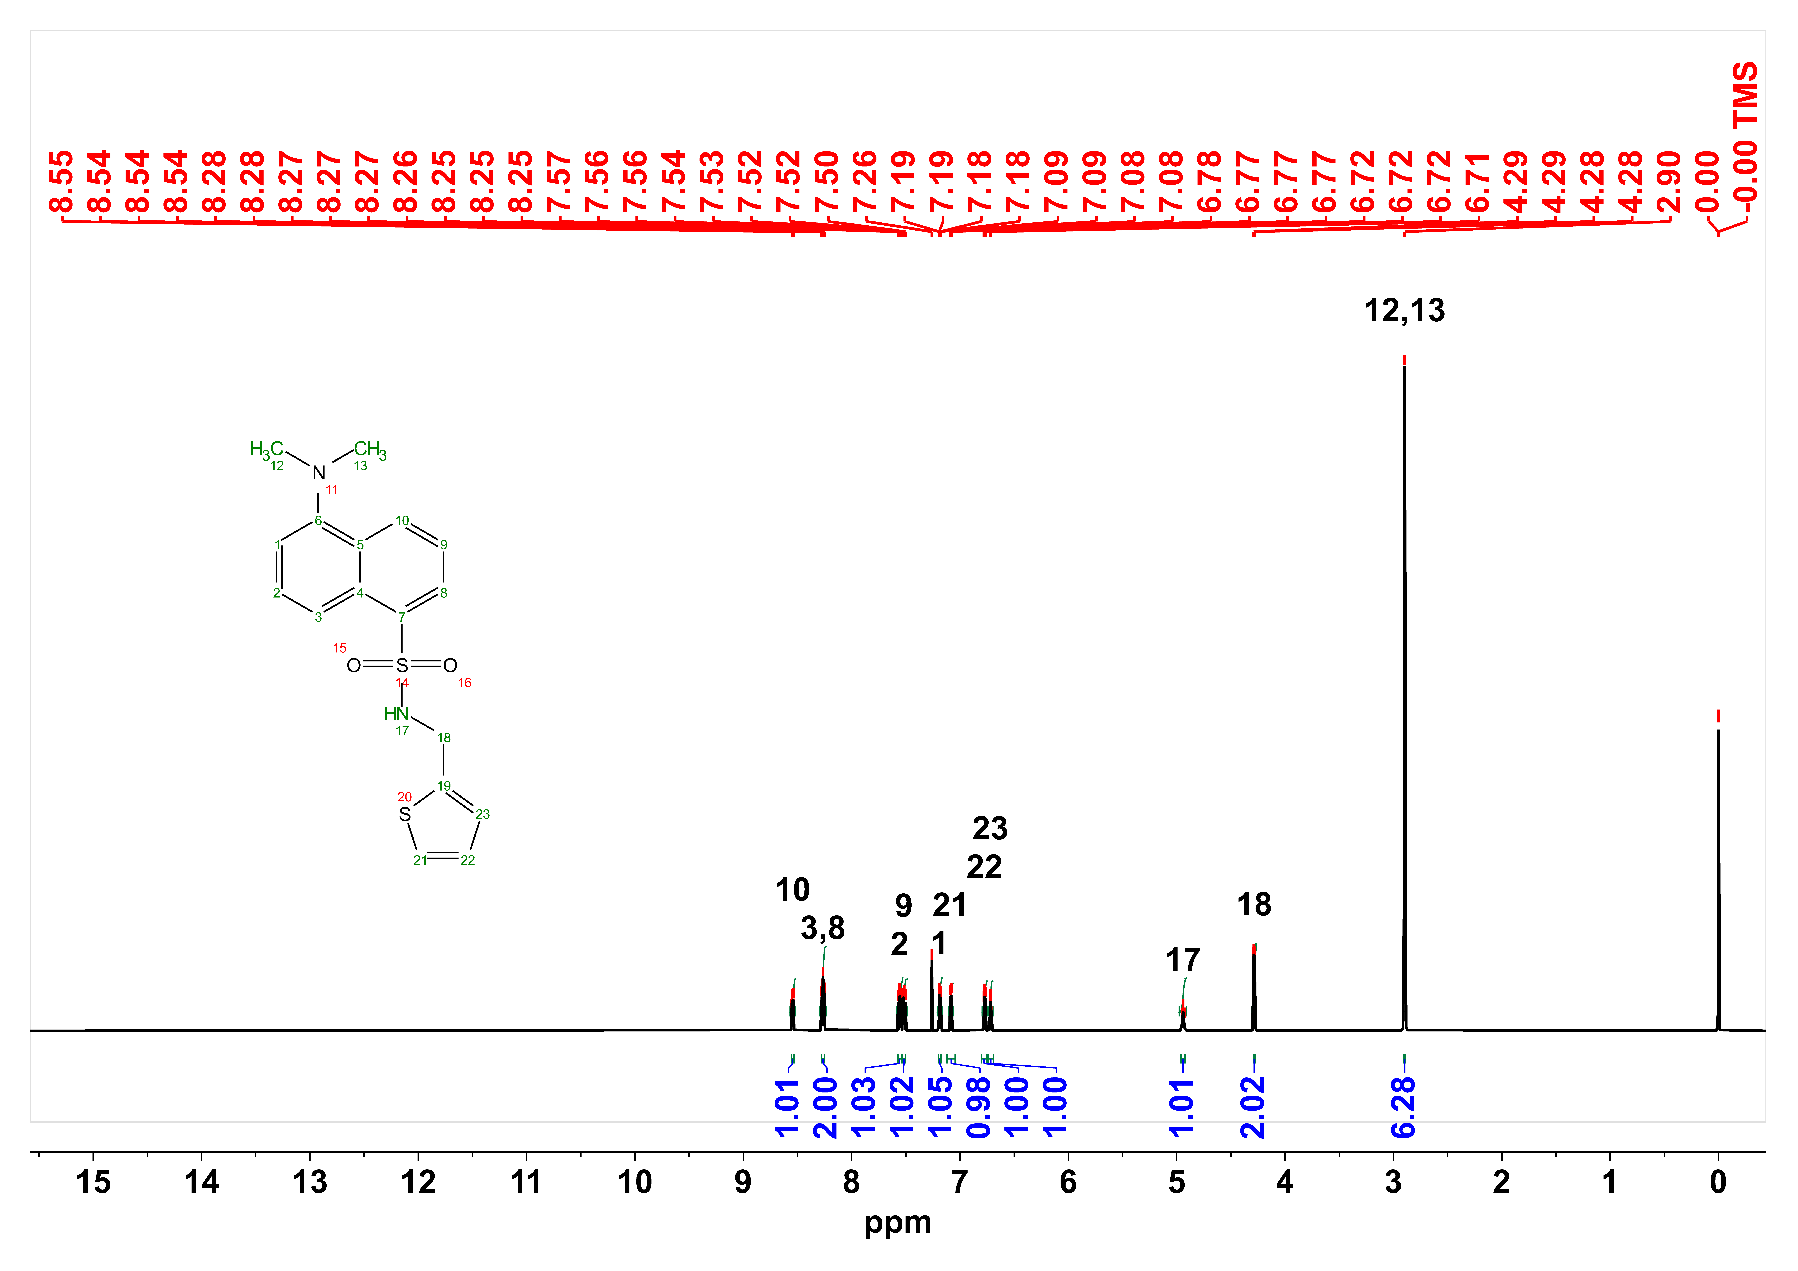


**Figure S1.** 1H NMR spectrum of **L1**.


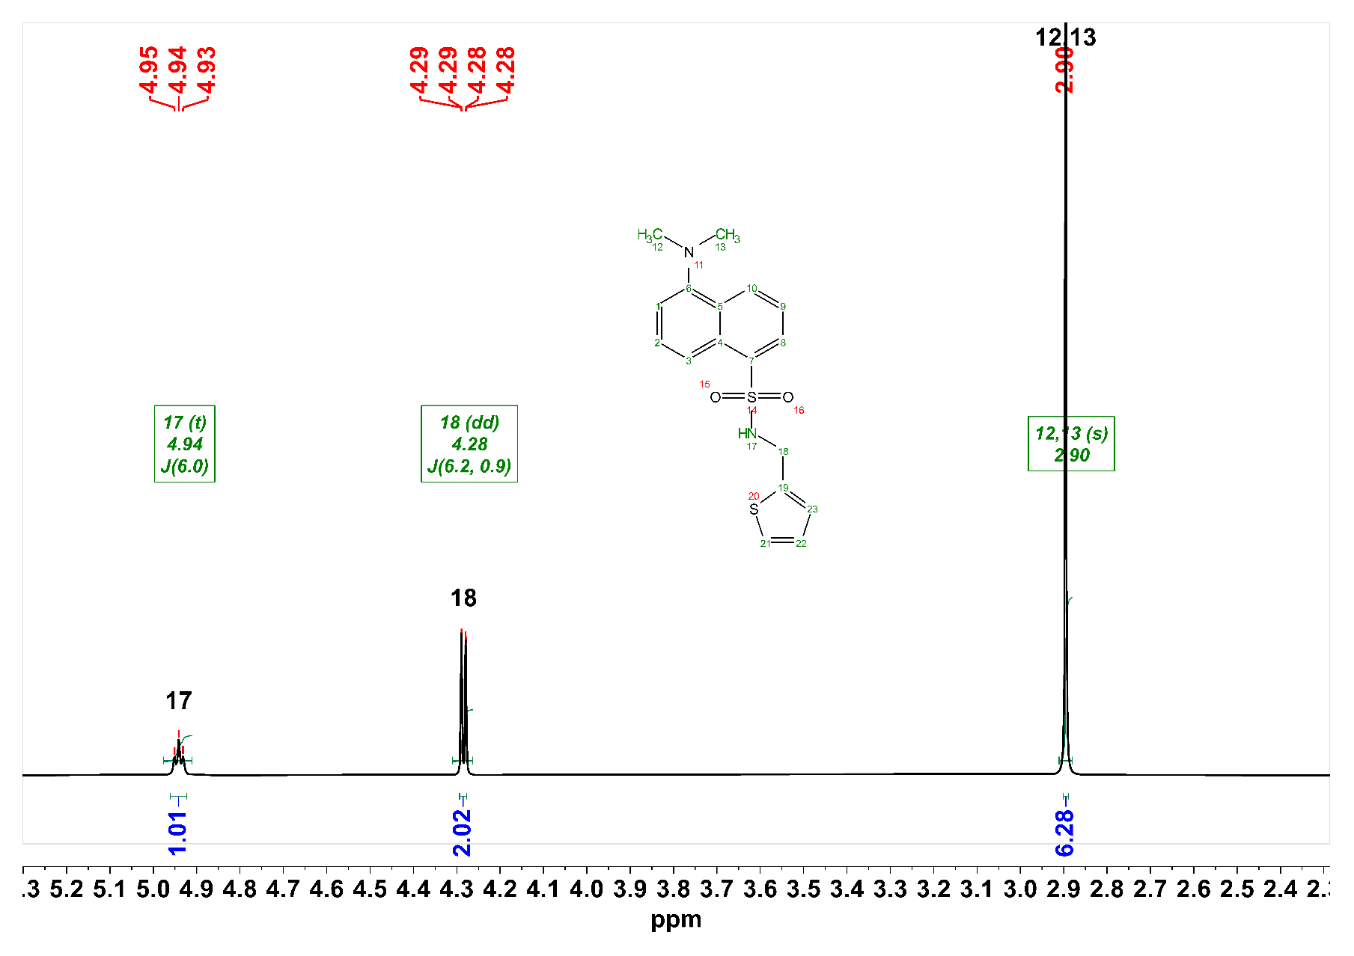


**Figure S1.** 1H NMR spectrum of **L1** (details).


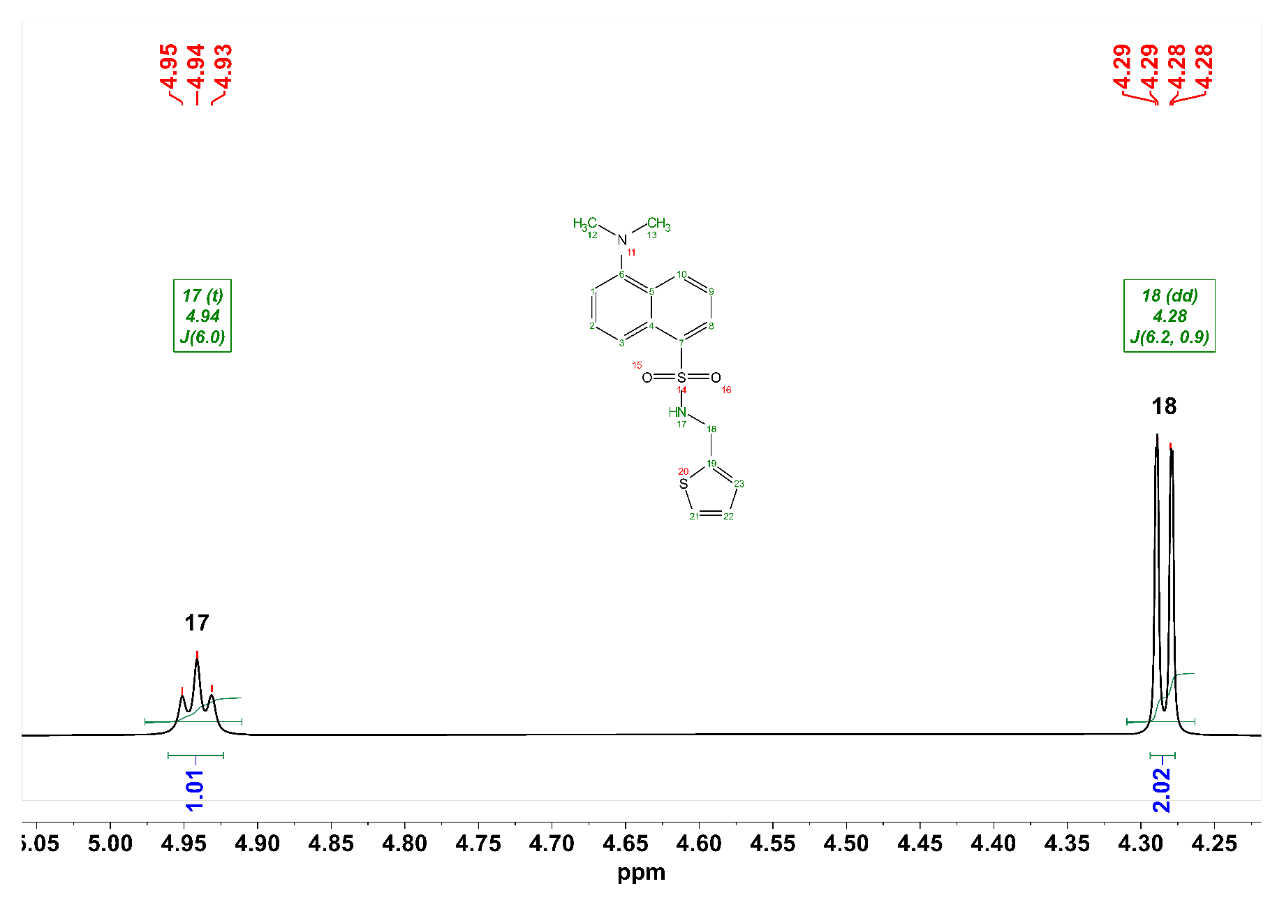


**Figure S1.** 1H NMR spectrum of **L1** (details).


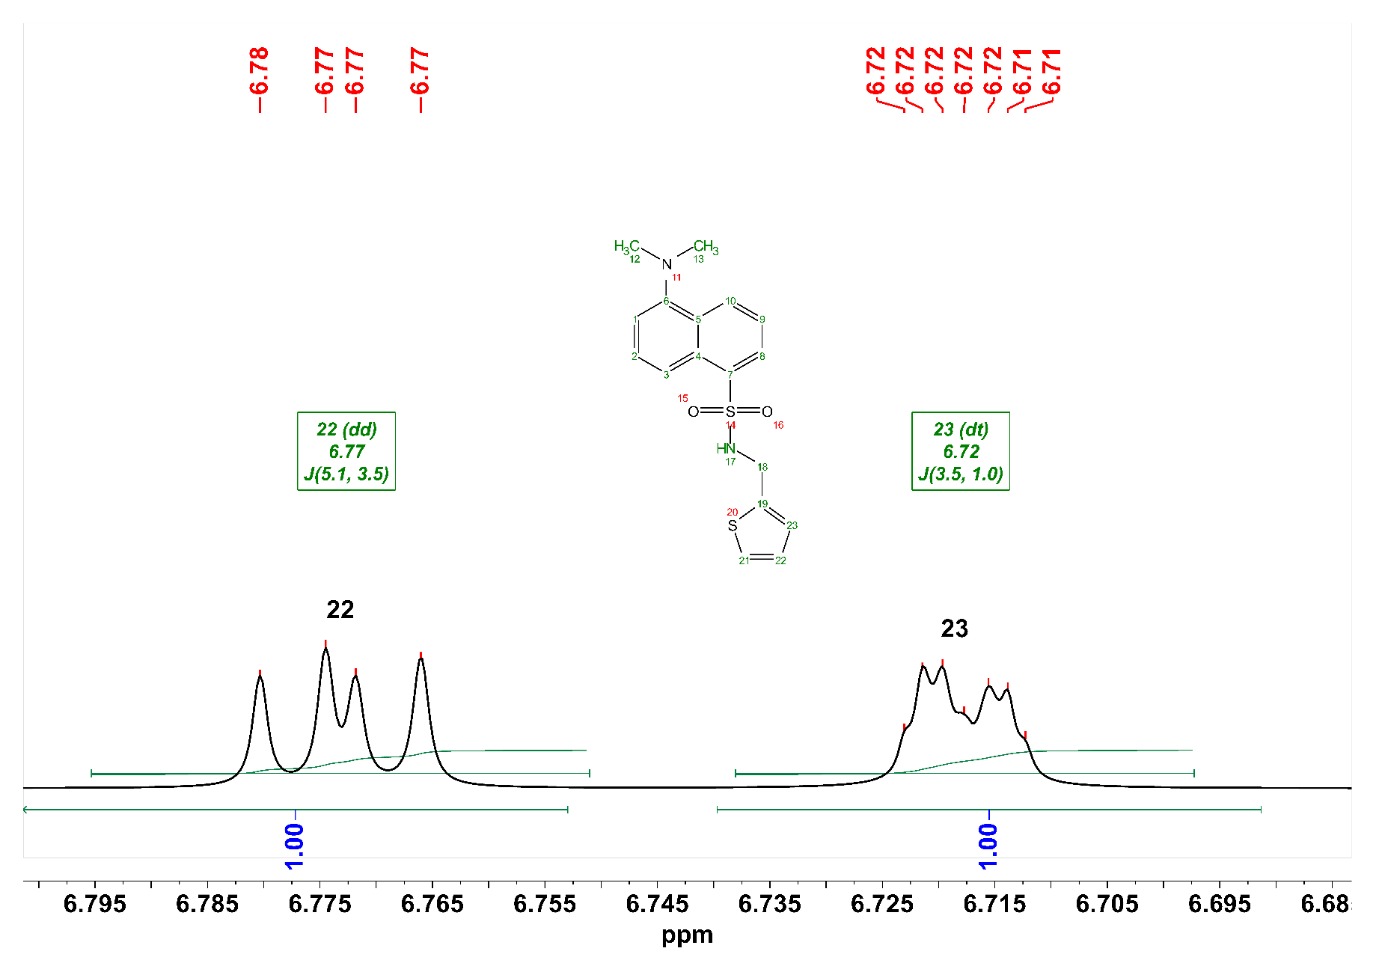


**Figure S1.** 1H NMR spectrum of **L1** (details).


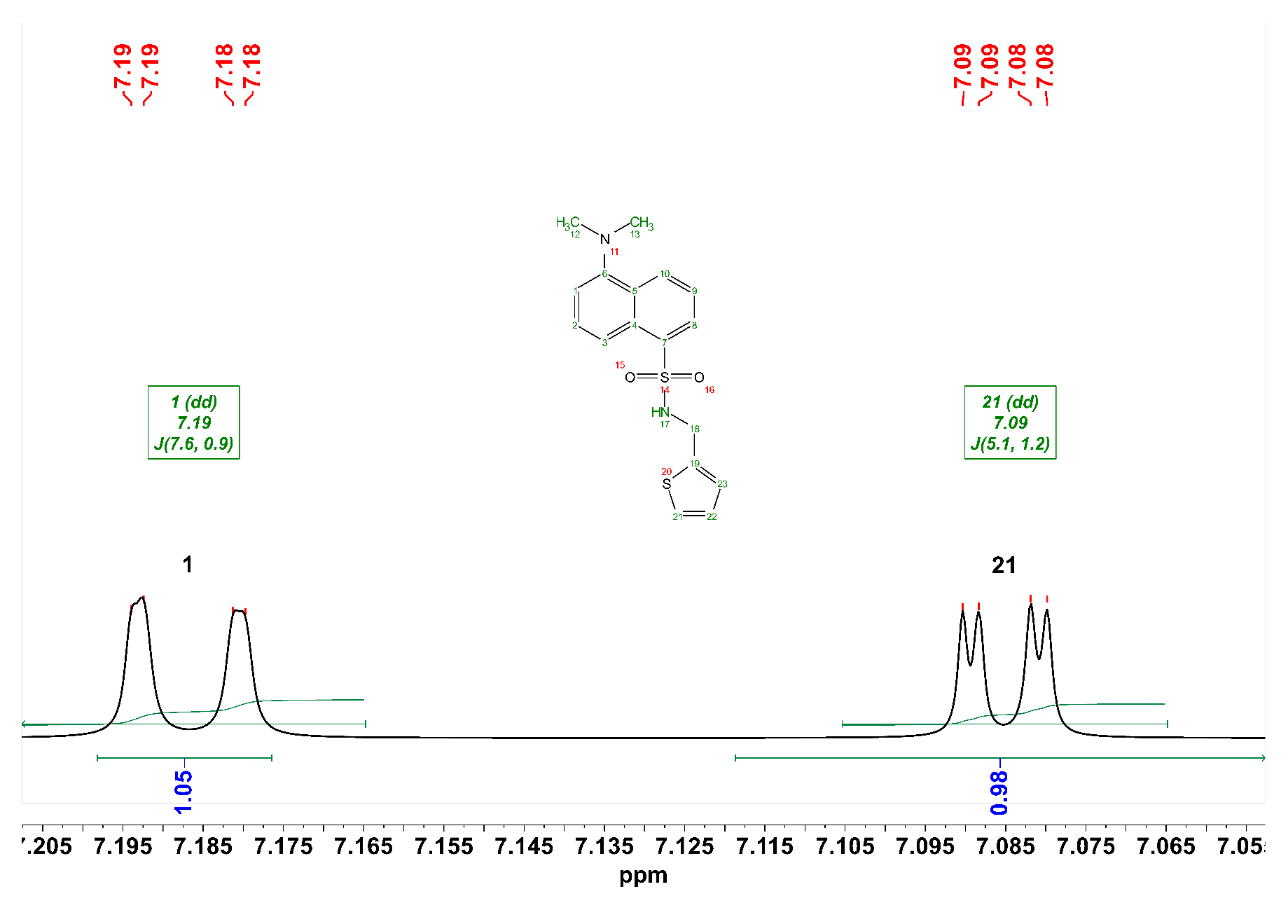


**Figure S1.** 1H NMR spectrum of **L1** (details).


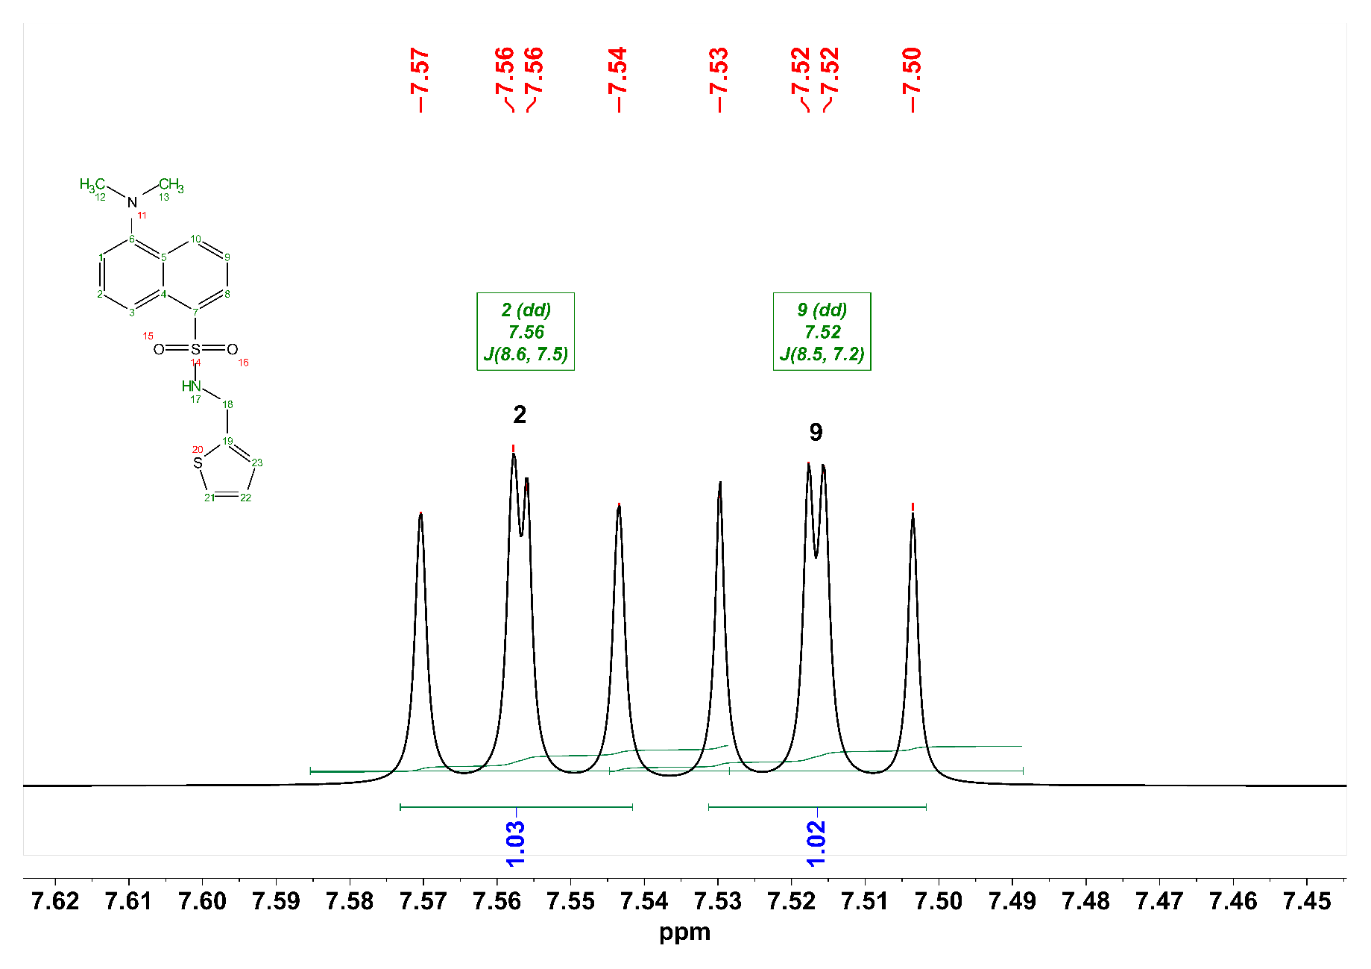


**Figure S1.** 1H NMR spectrum of **L1** (details).


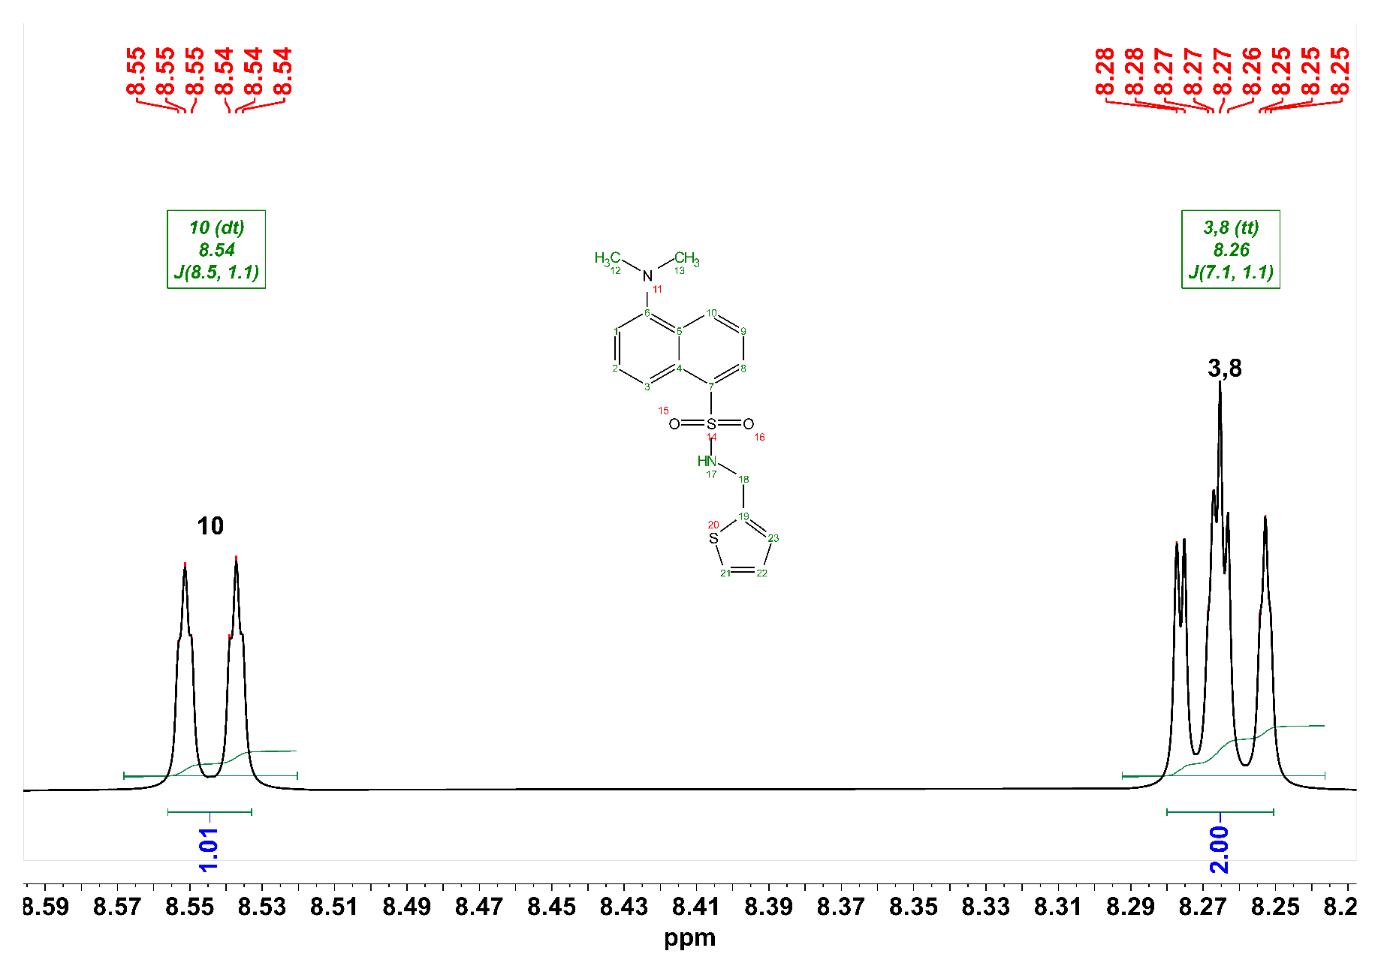


**Figure S1.** 1H NMR spectrum of **L1** (details).


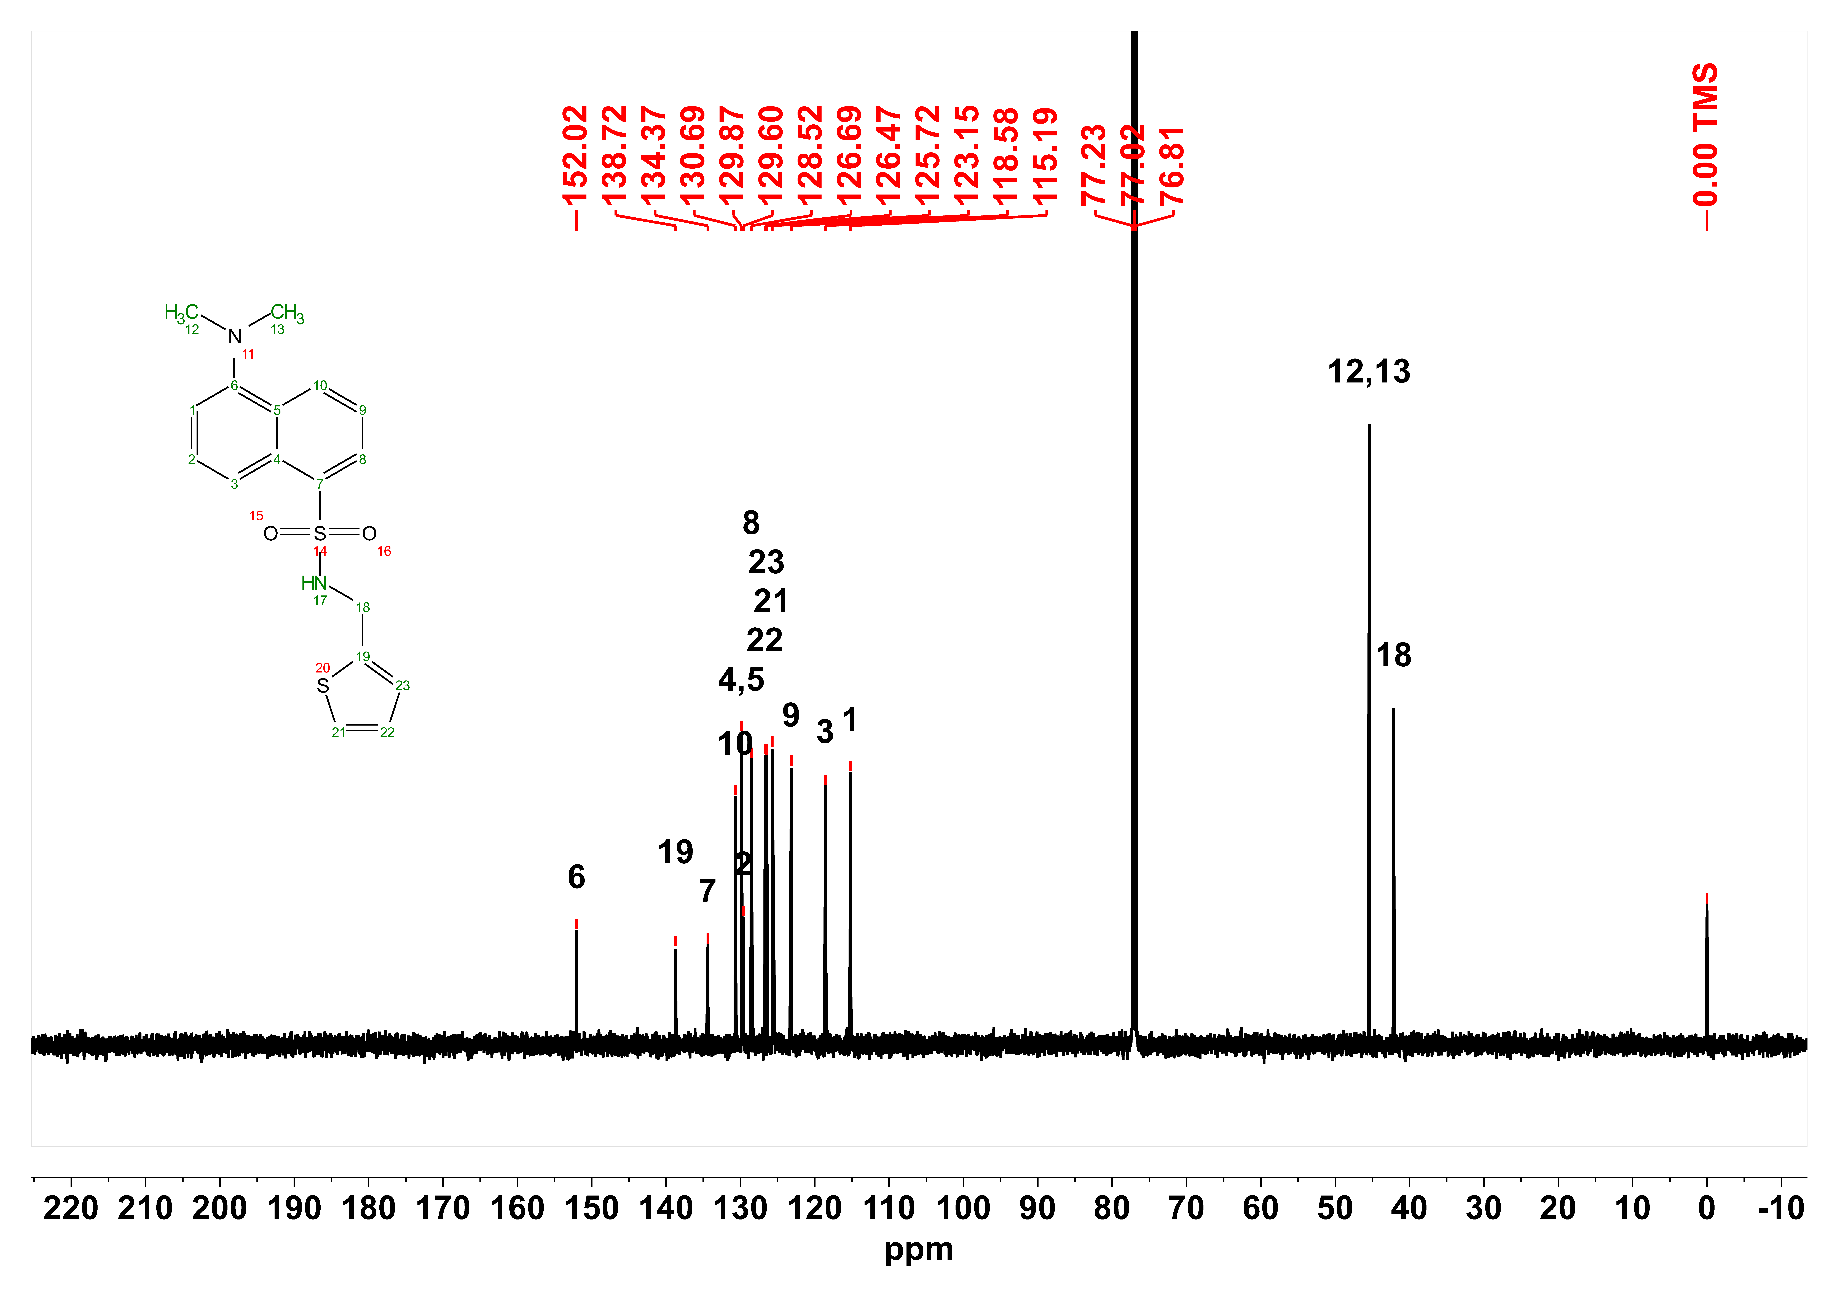


**Figure S1.** 13C NMR spectrum of **L1**.


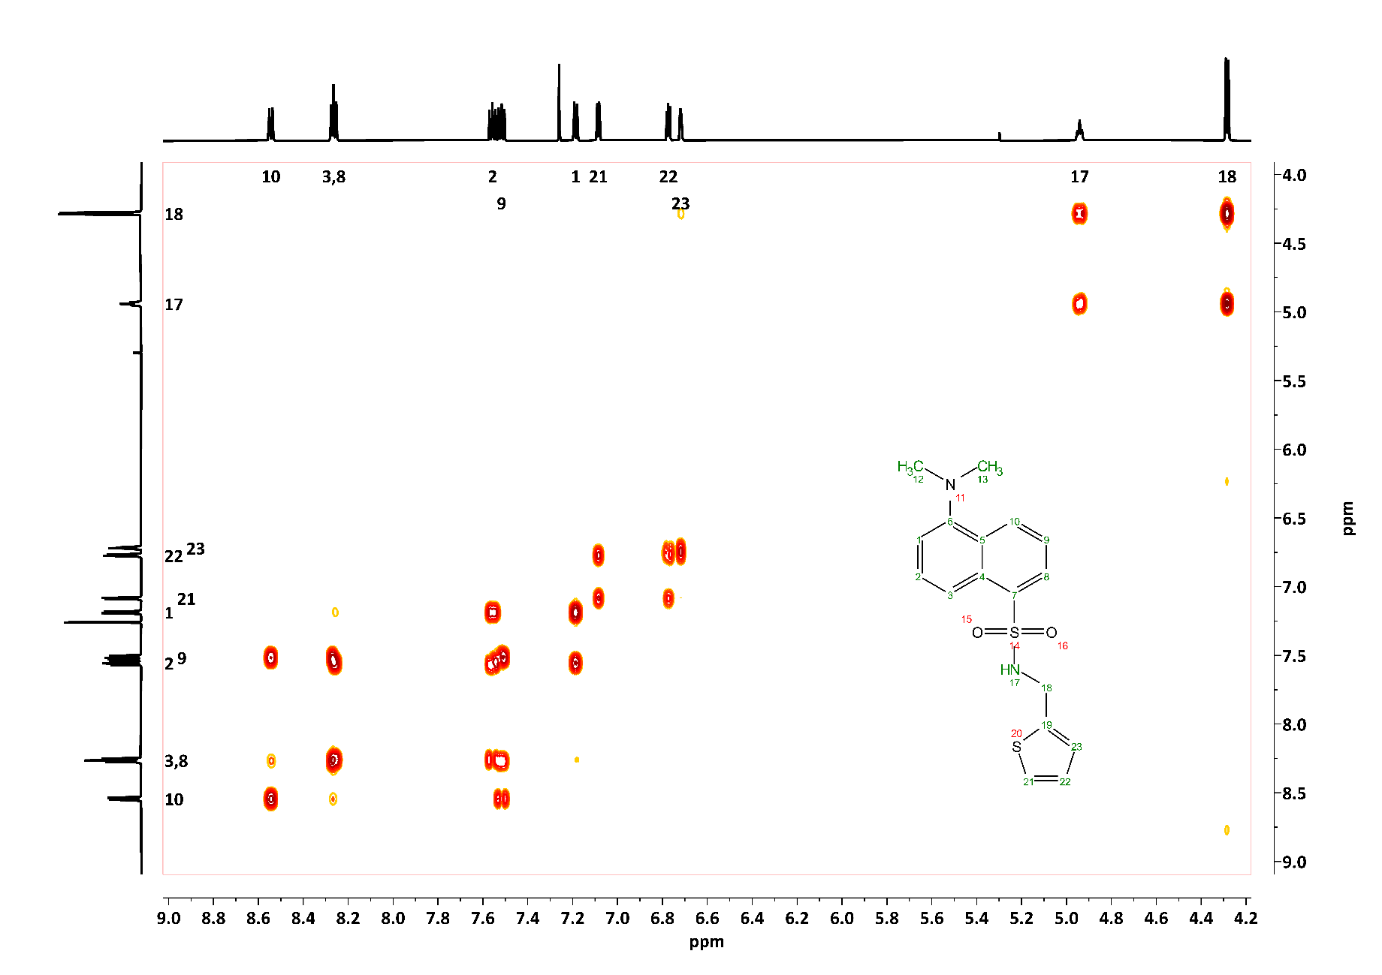


**Figure S1.** COSY-NMR spectrum of **L1**.


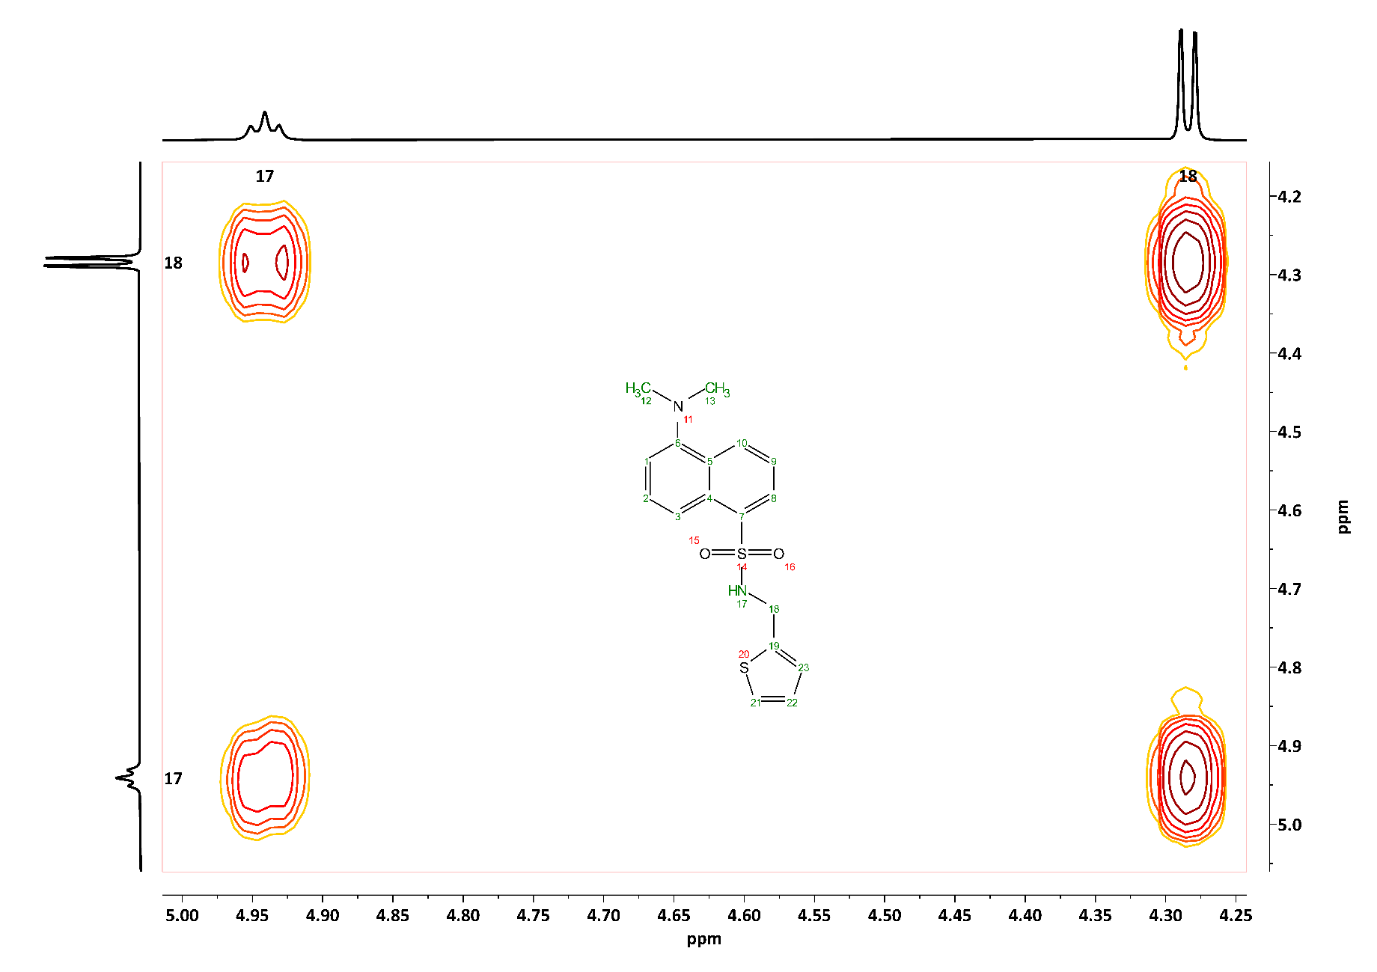


**Figure S1.** COSY-NMR spectrum of **L1** (details).


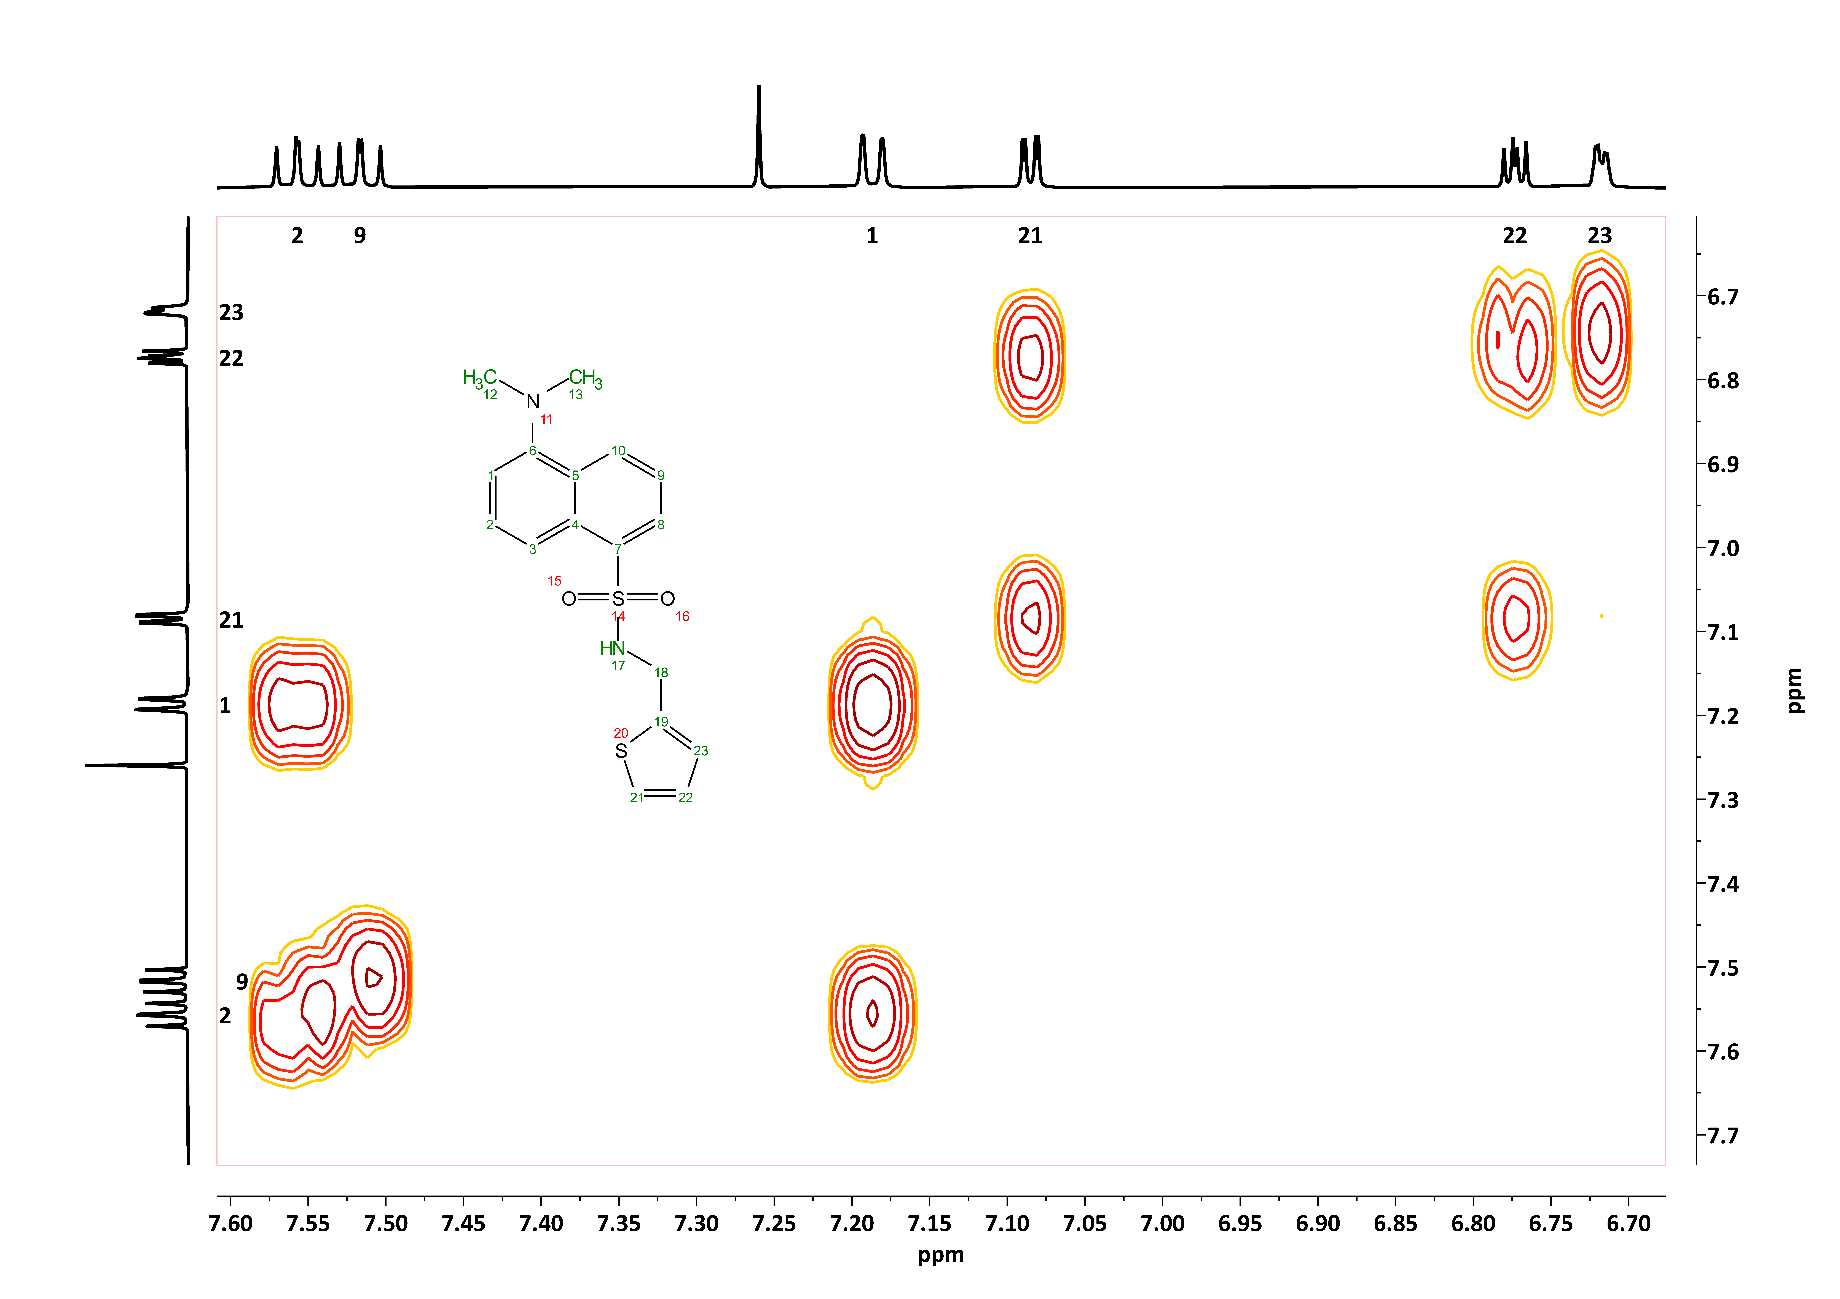


**Figure S1.** COSY-NMR spectrum of **L1** (details).


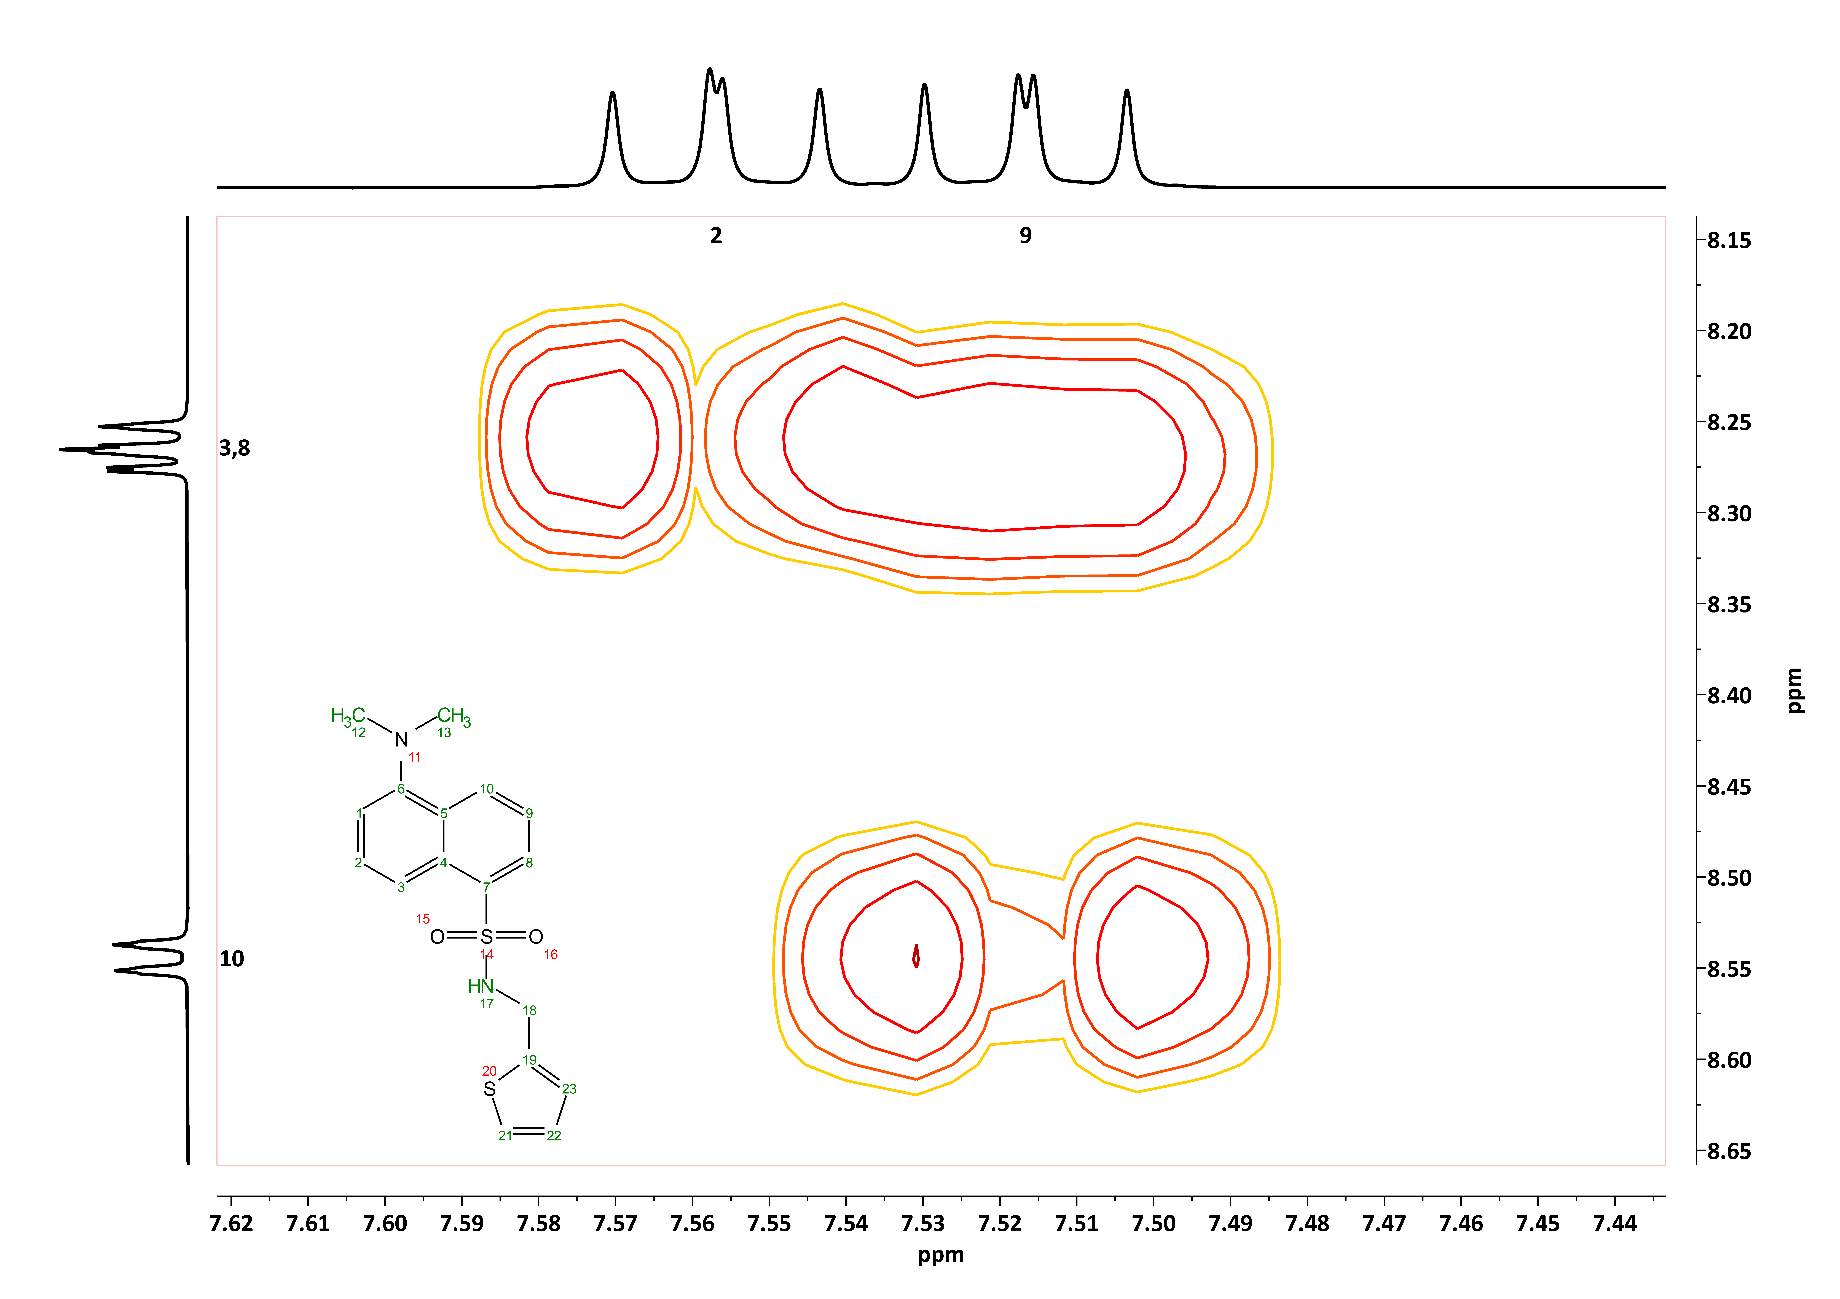


**Figure S1.** COSY-NMR spectrum of **L1** (details).


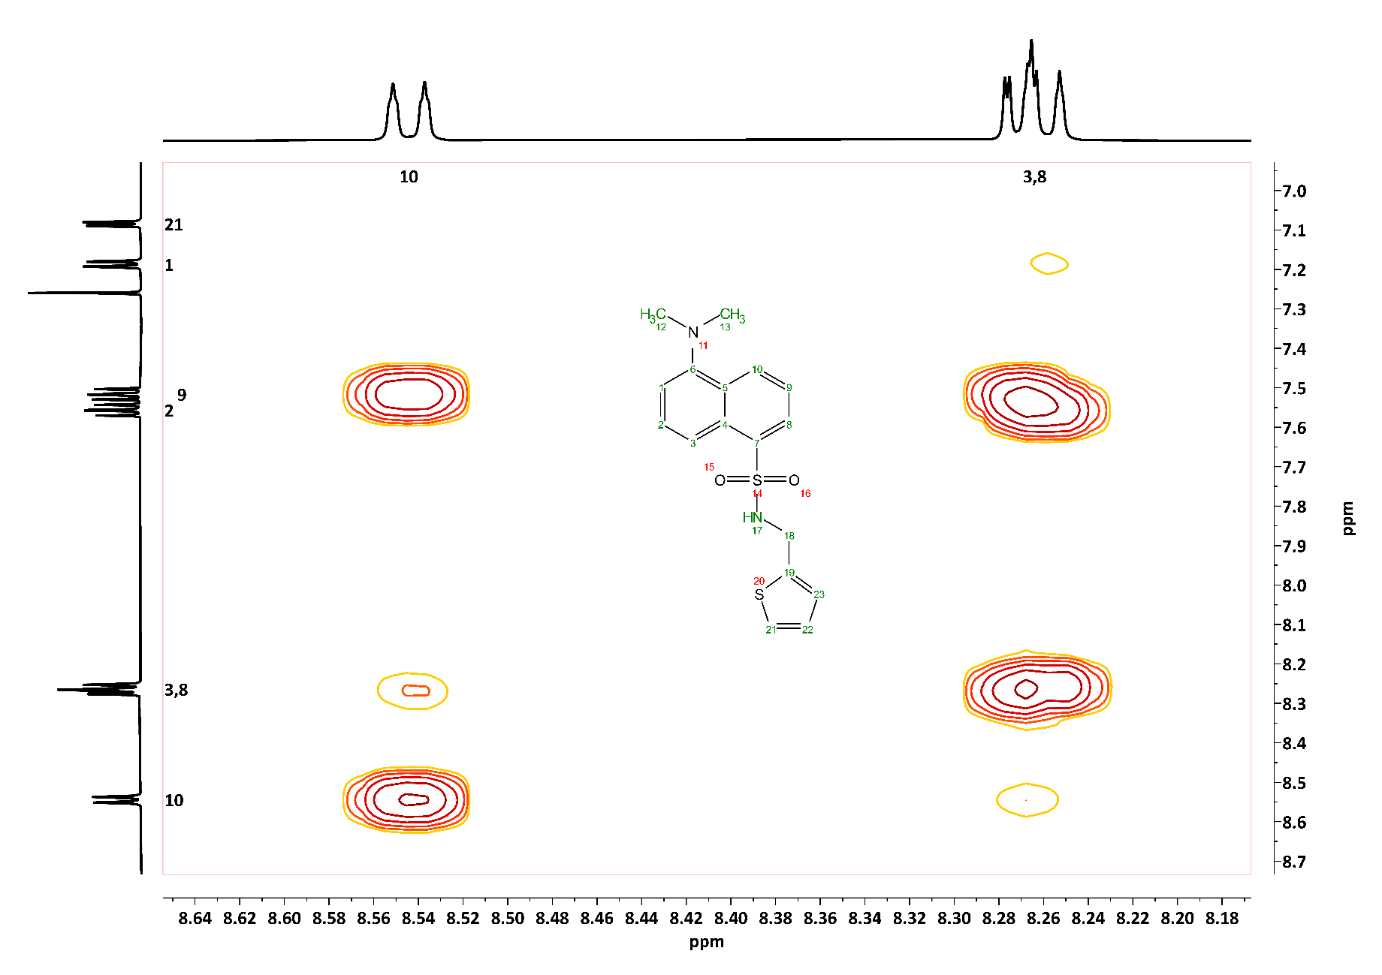


**Figure S1.** COSY-NMR spectrum of **L1** (details).


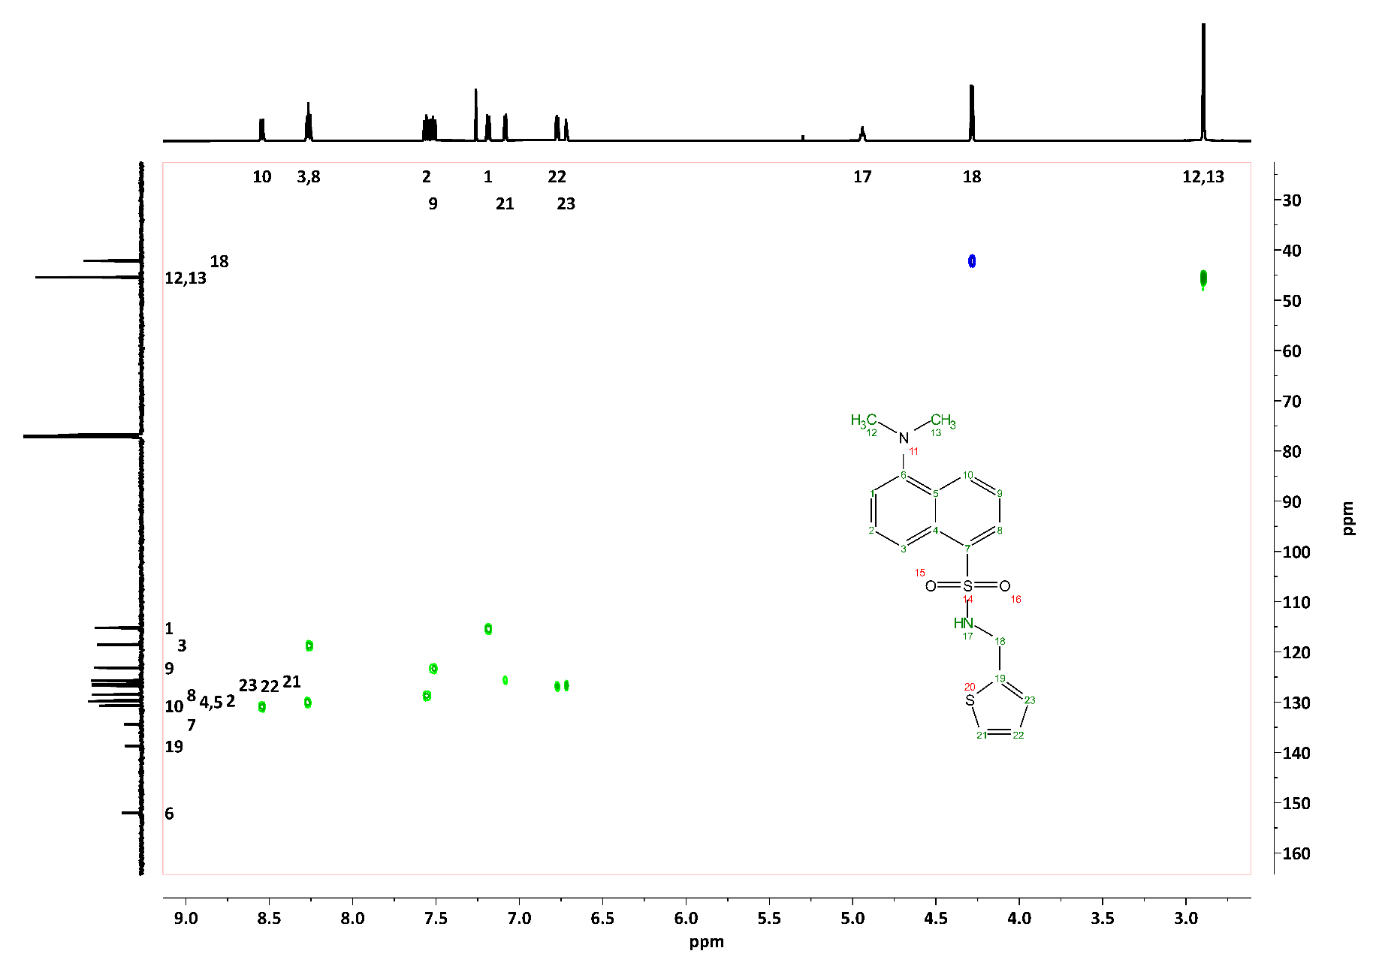


**Figure S1.** HSQC-NMR spectrum of compound **L1**.


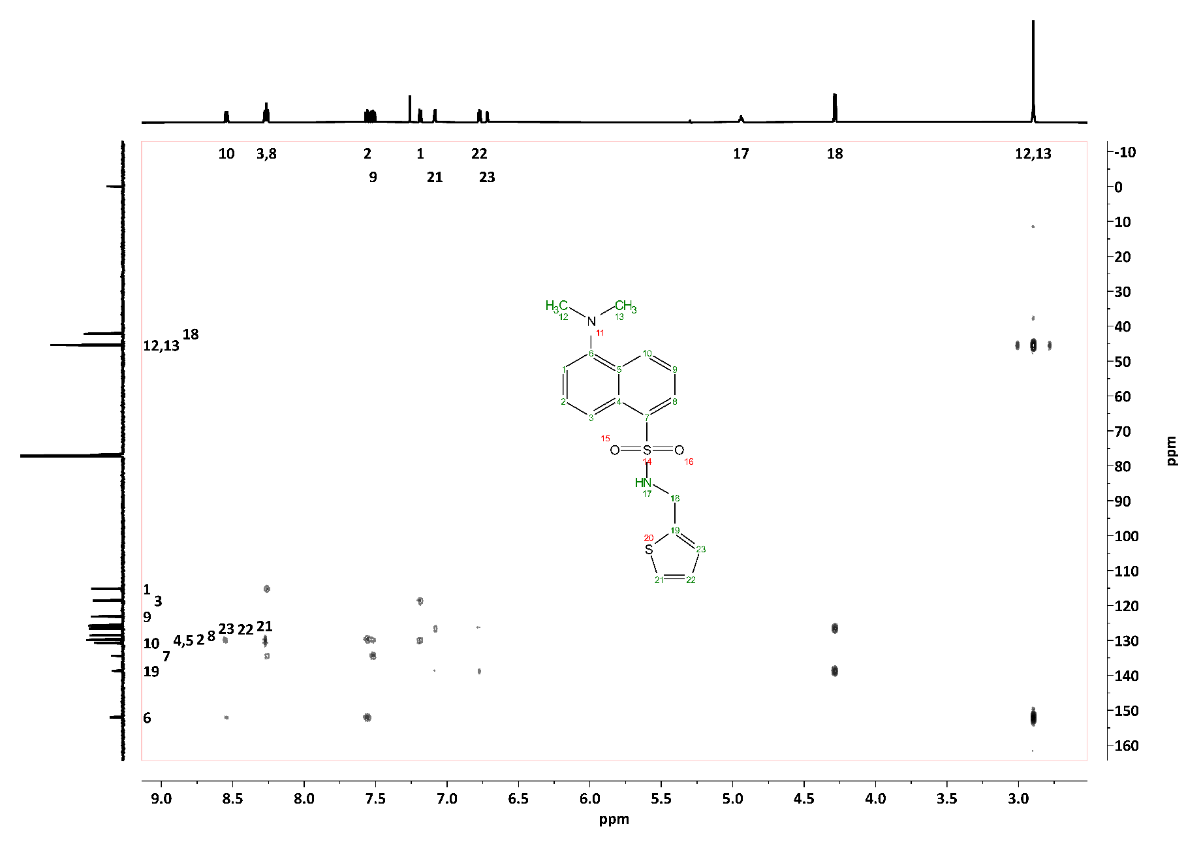

**Figure S1-14.** HSQC-NMR spectrum of compound **L1**.


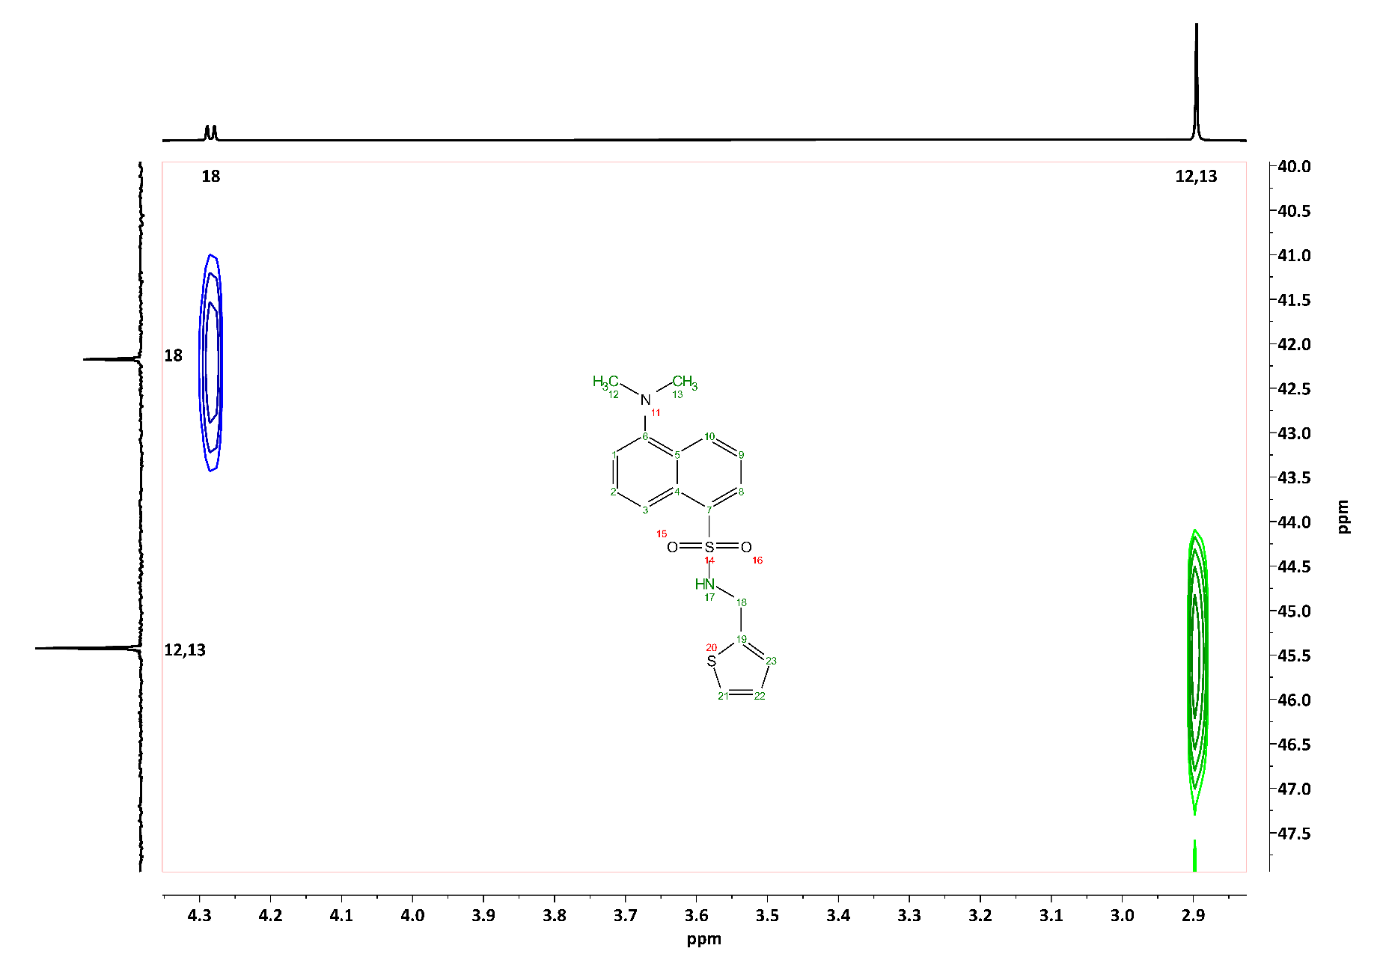


**Figure S1.** HSQC-NMR spectrum of compound **L1** (details).


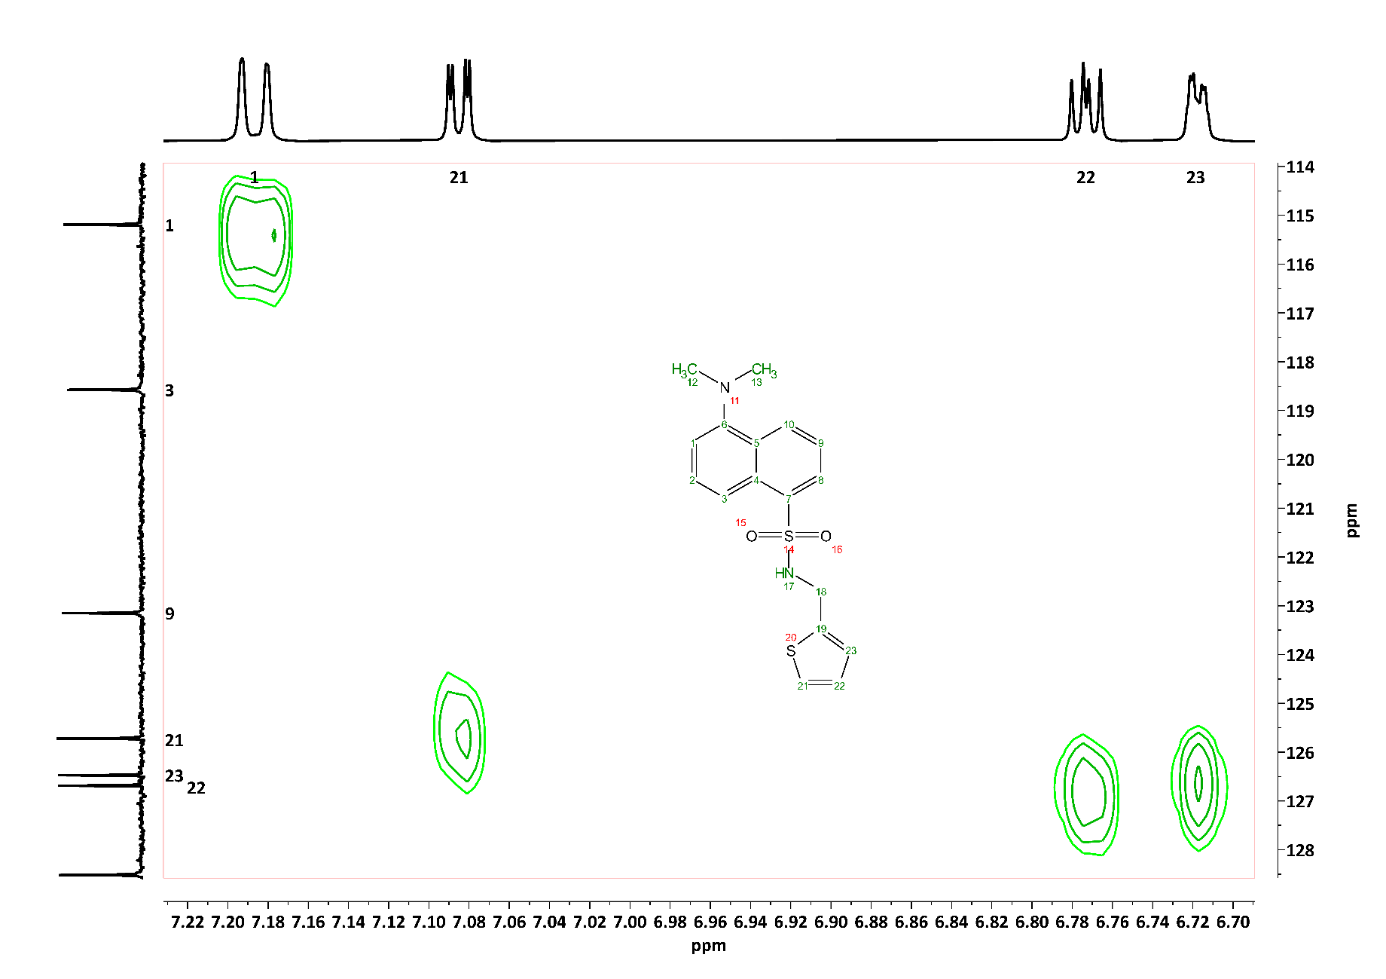


**Figure S1.** HSQC-NMR spectrum of compound **L1** (details).


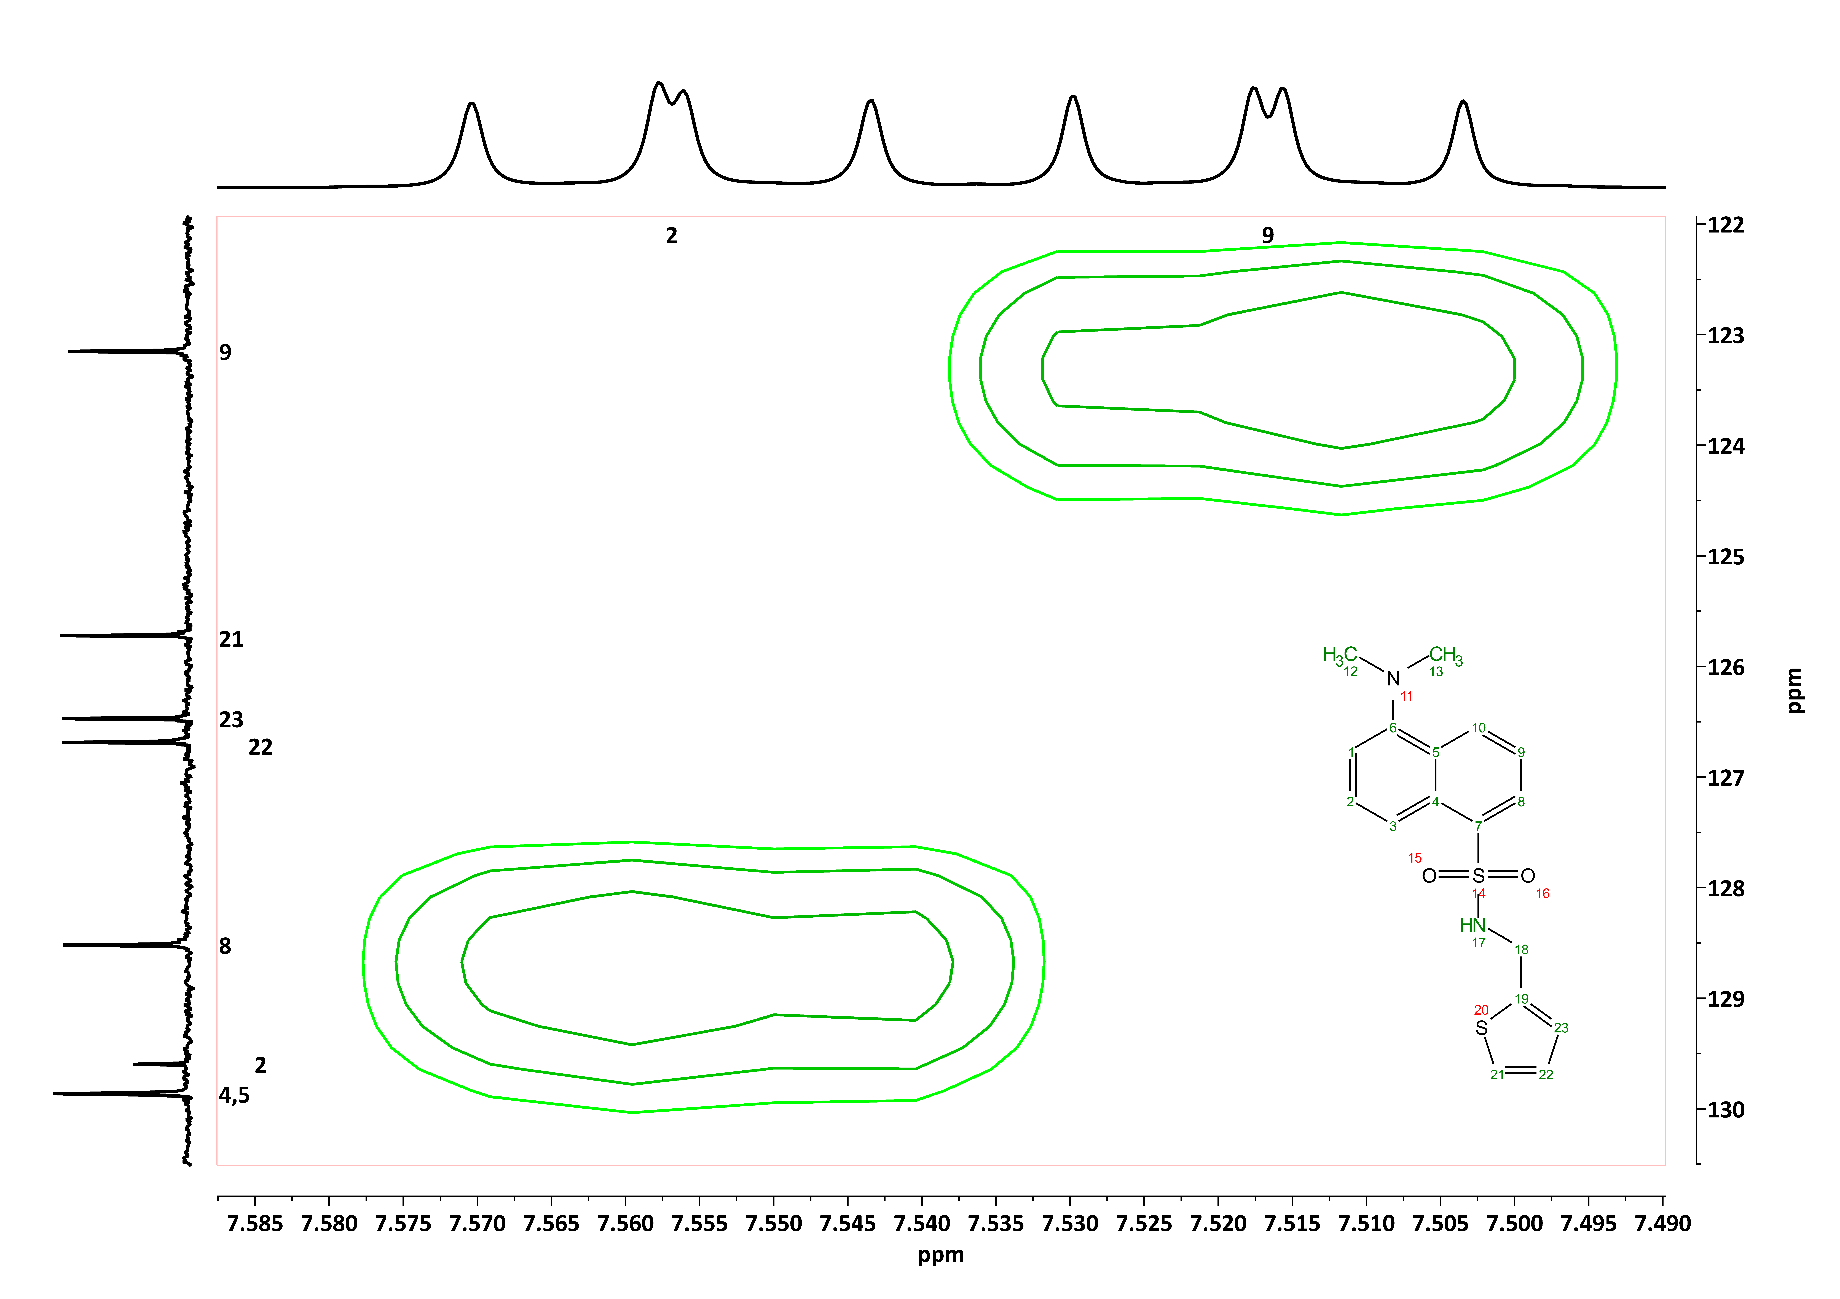


**Figure S1.** HSQC-NMR spectrum of compound **L1** (details).


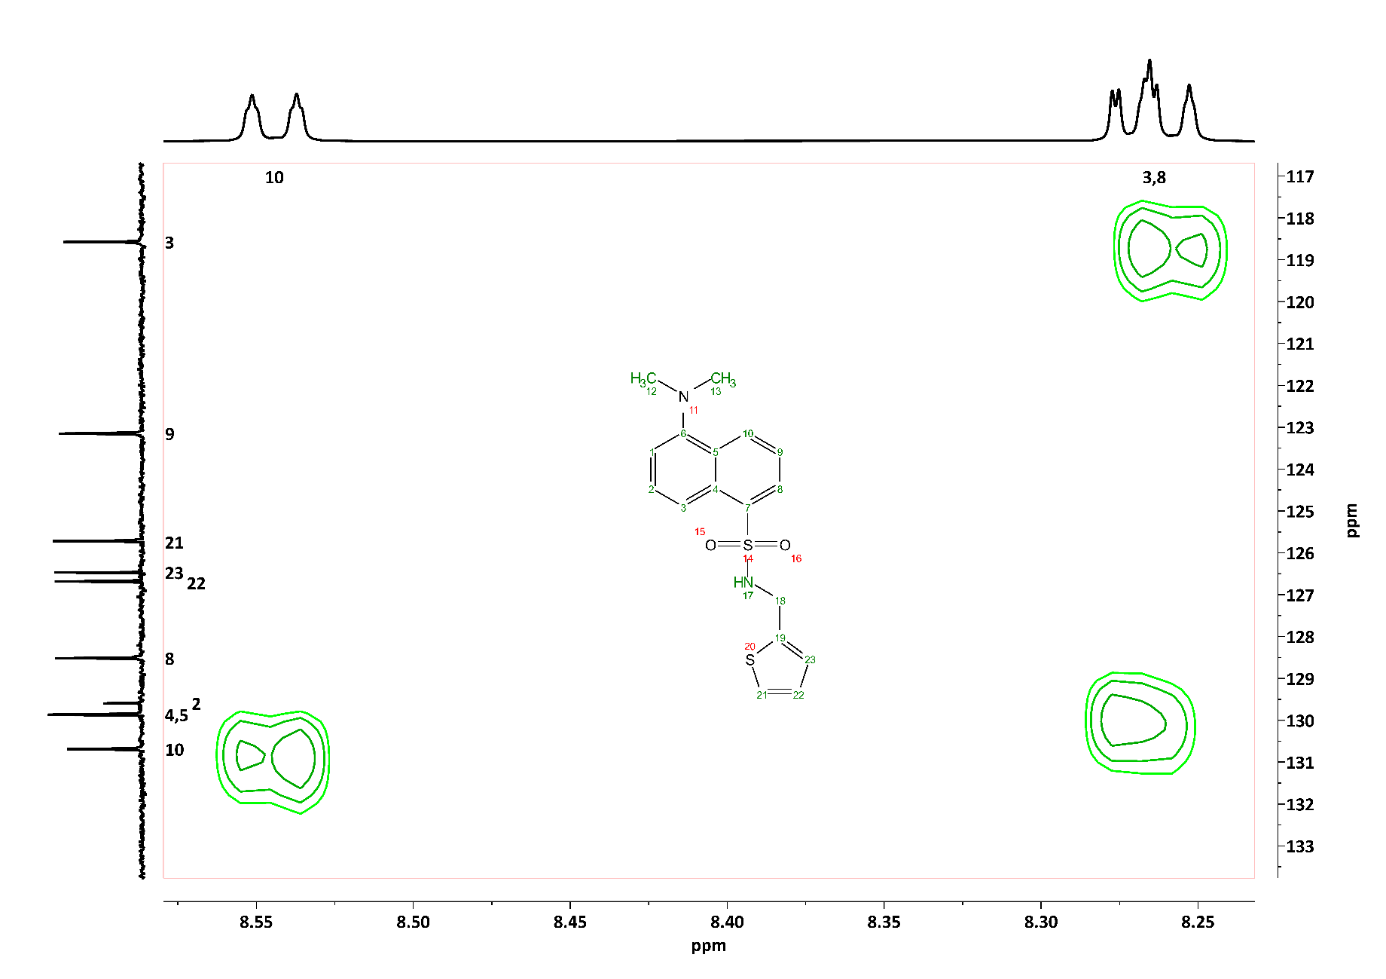


**Figure S1.** HSQC-NMR spectrum of compound **L1** (details).


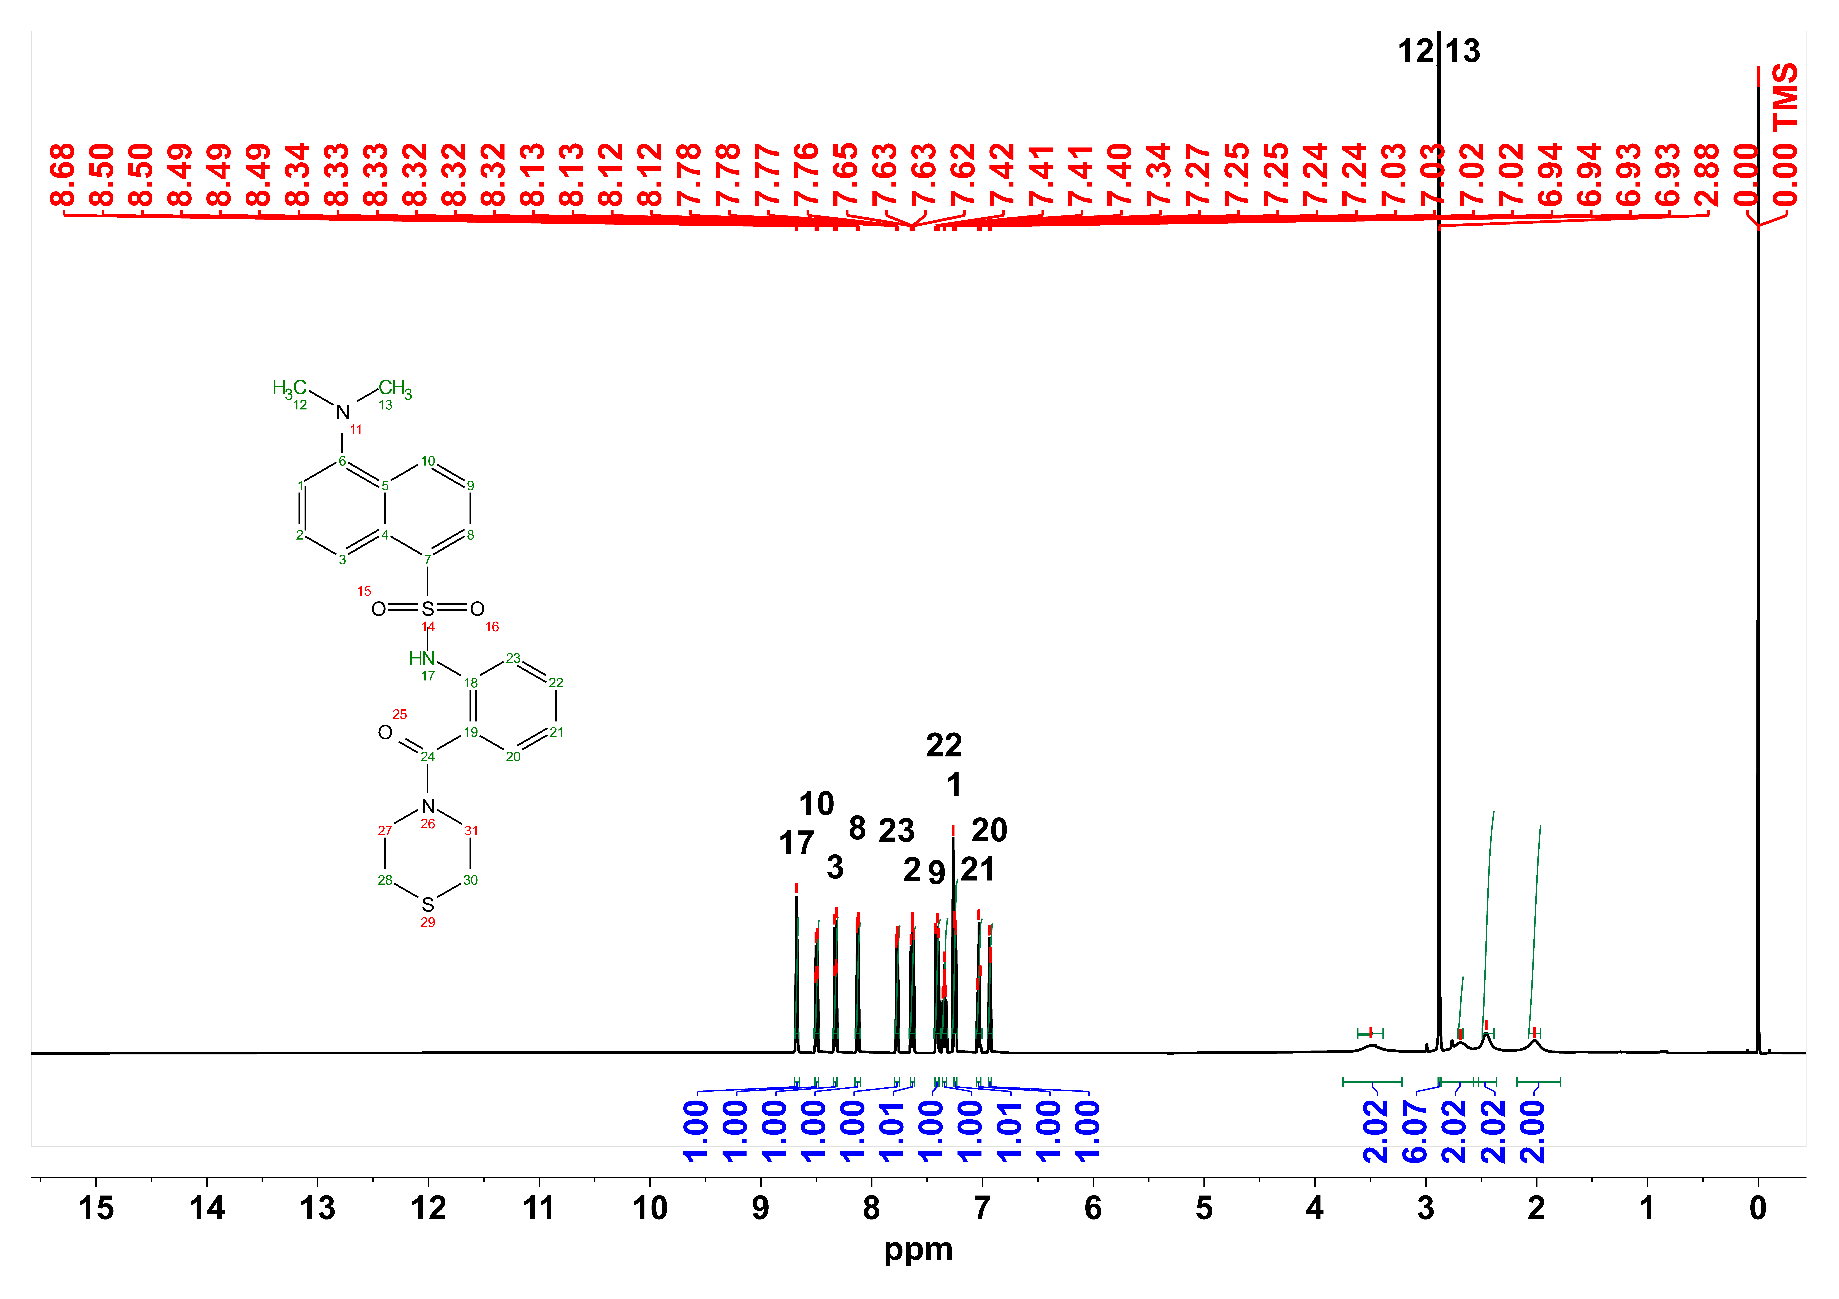


**Figure S2.** 1H-NMR spectrum of compound **2**.


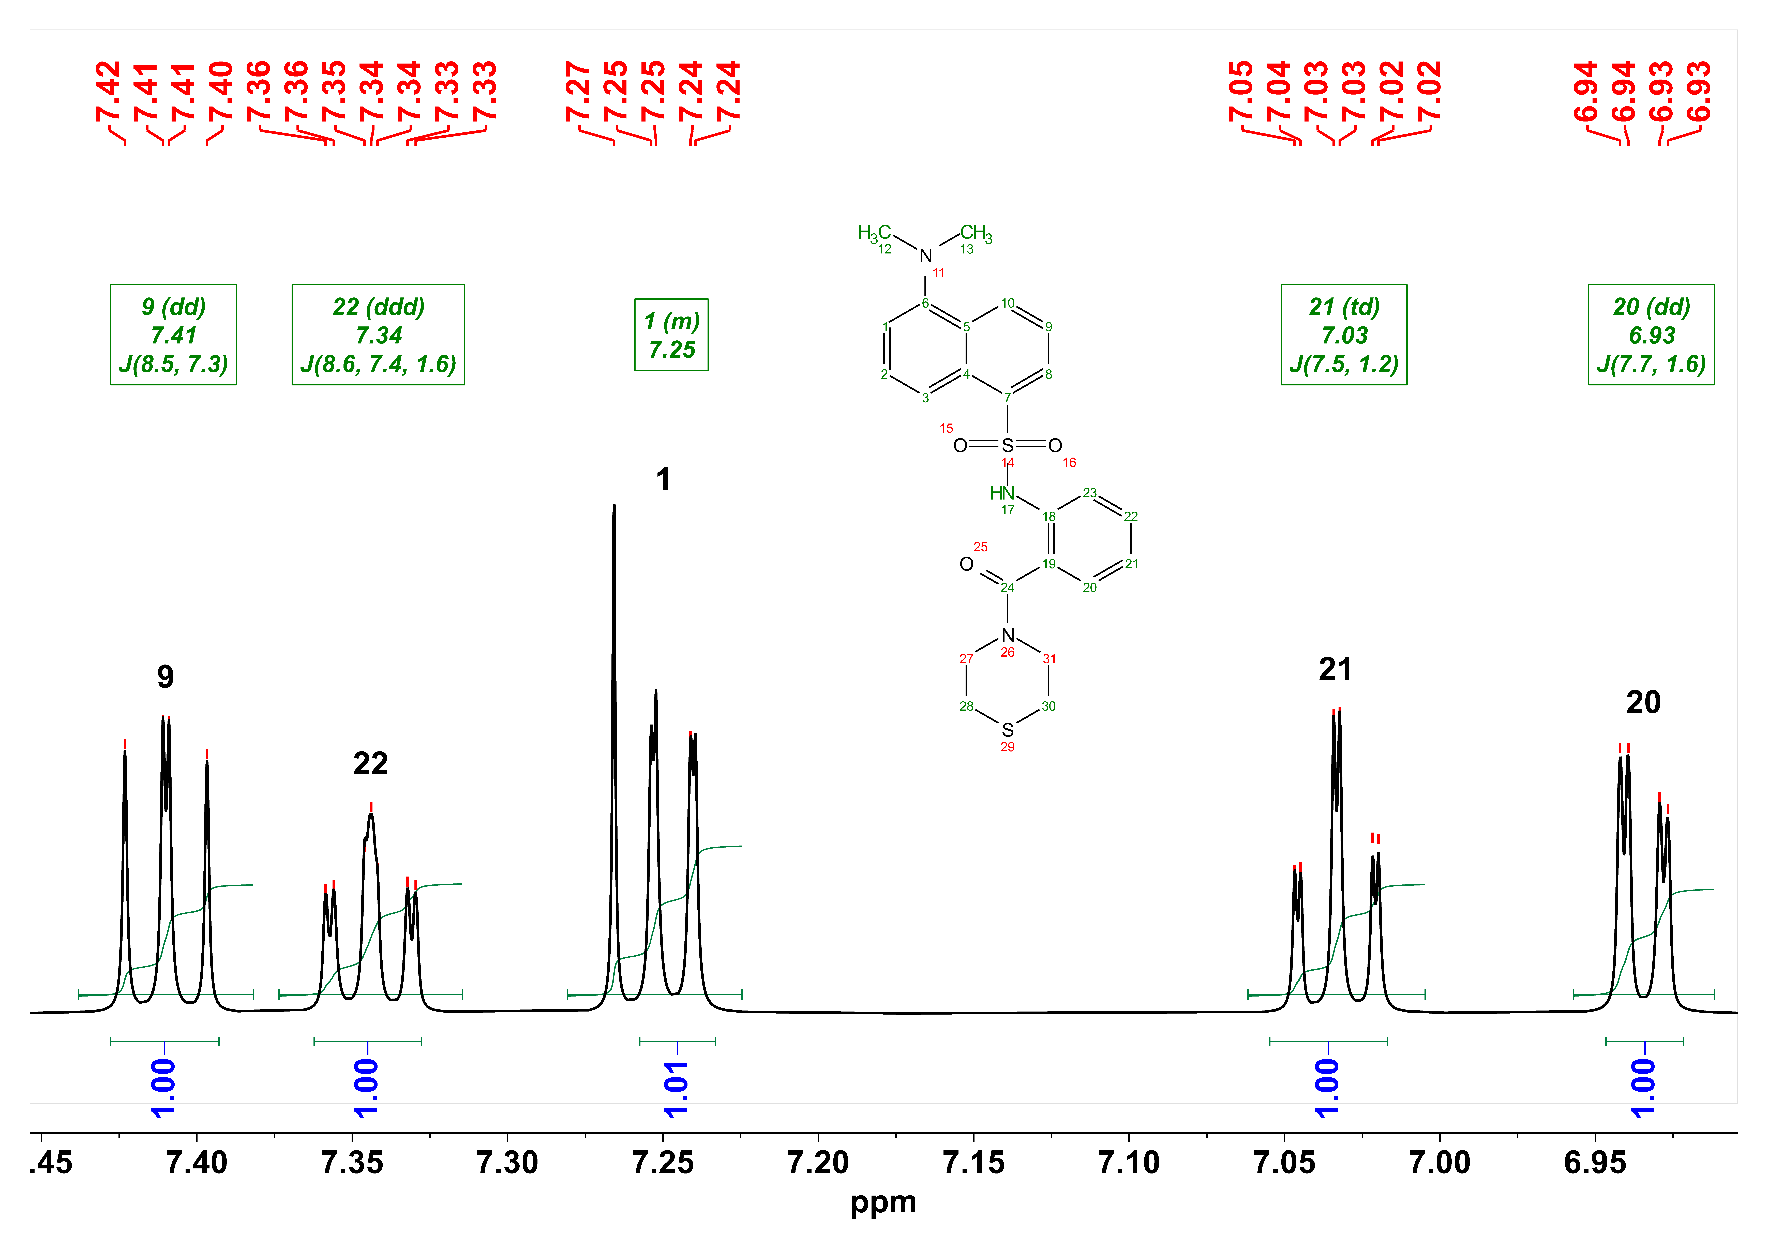


**Figure S2.** 1H-NMR spectrum of compound **2** (details).


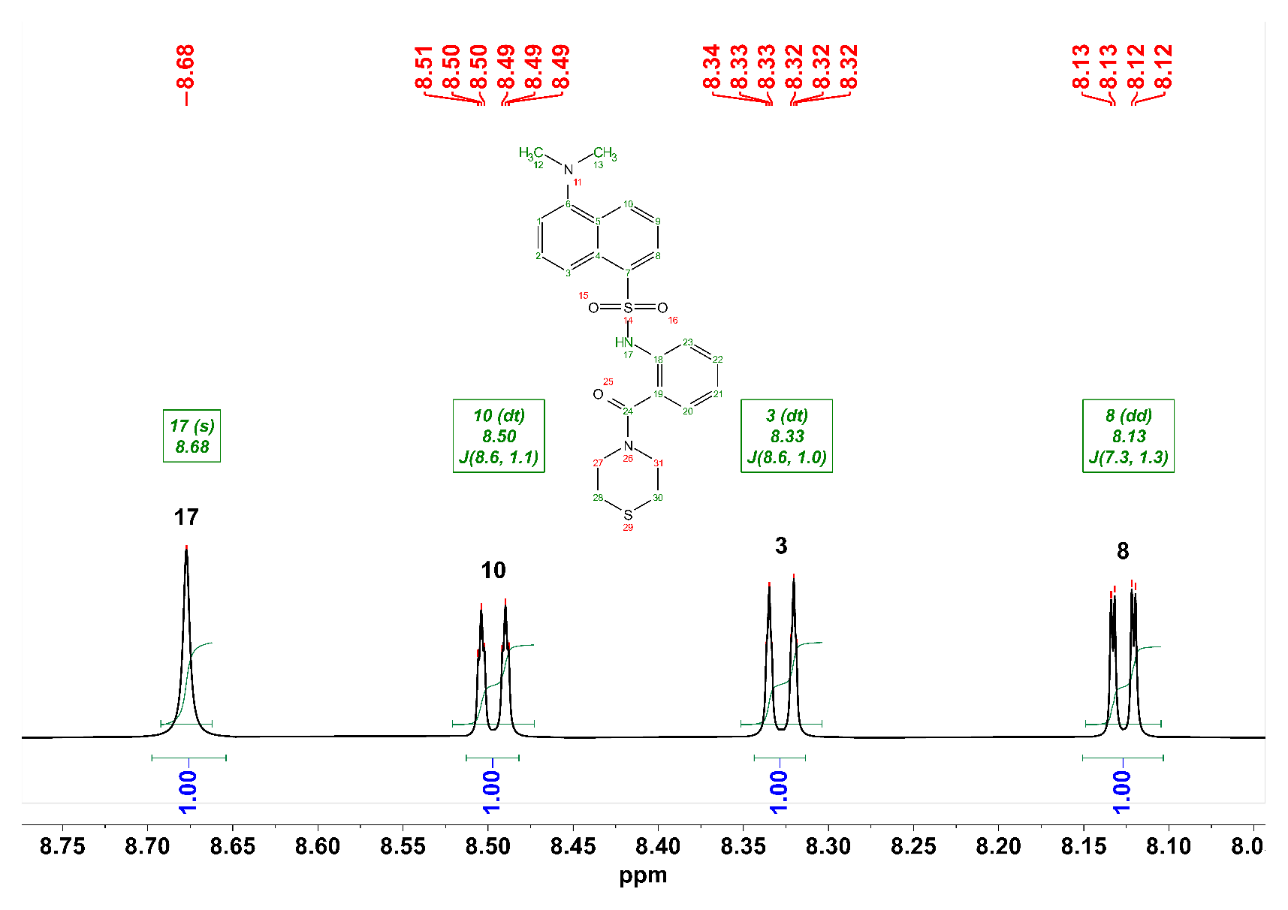


**Figure S2.** 1H-NMR spectrum of compound **2** (details).


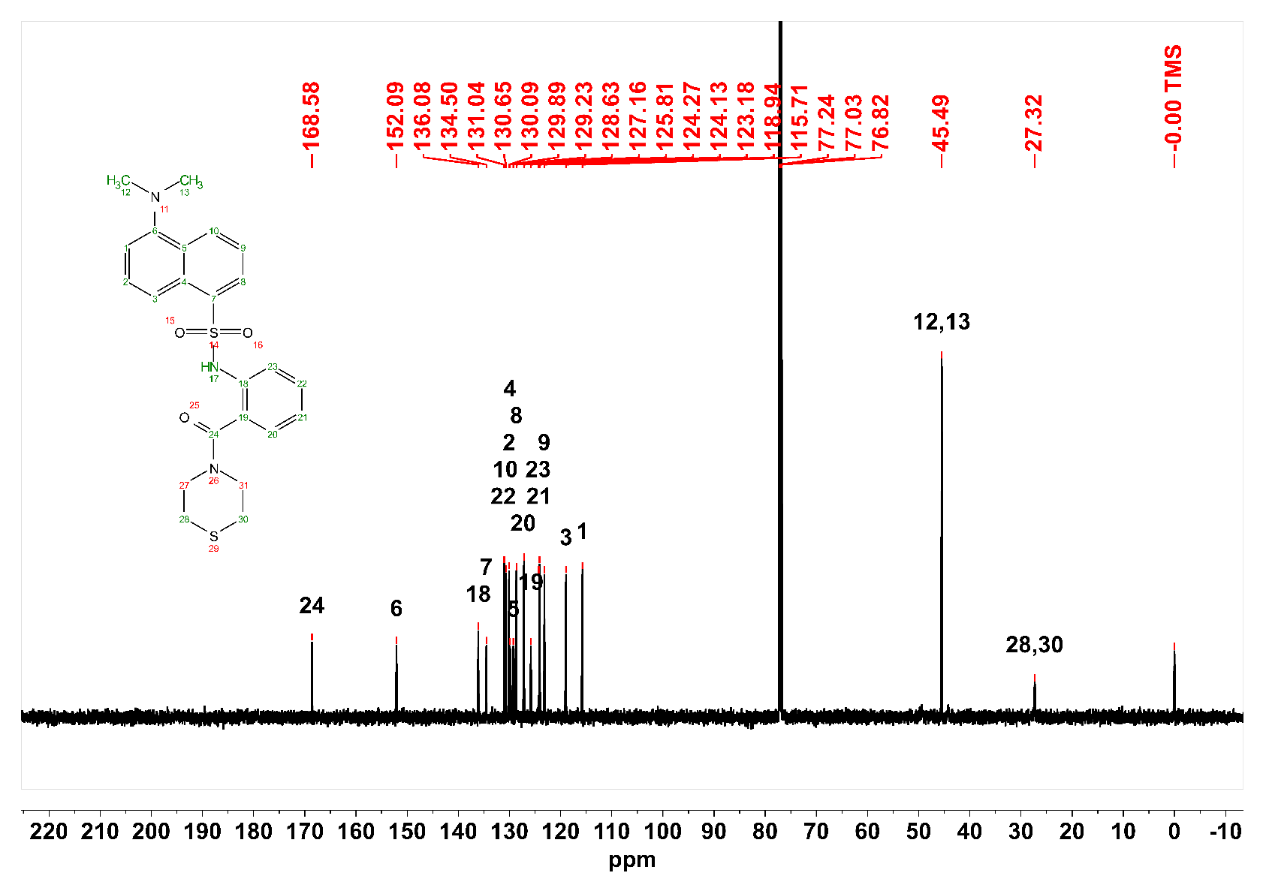


**Figure S2.** 13C-NMR spectrum of compound **2**.


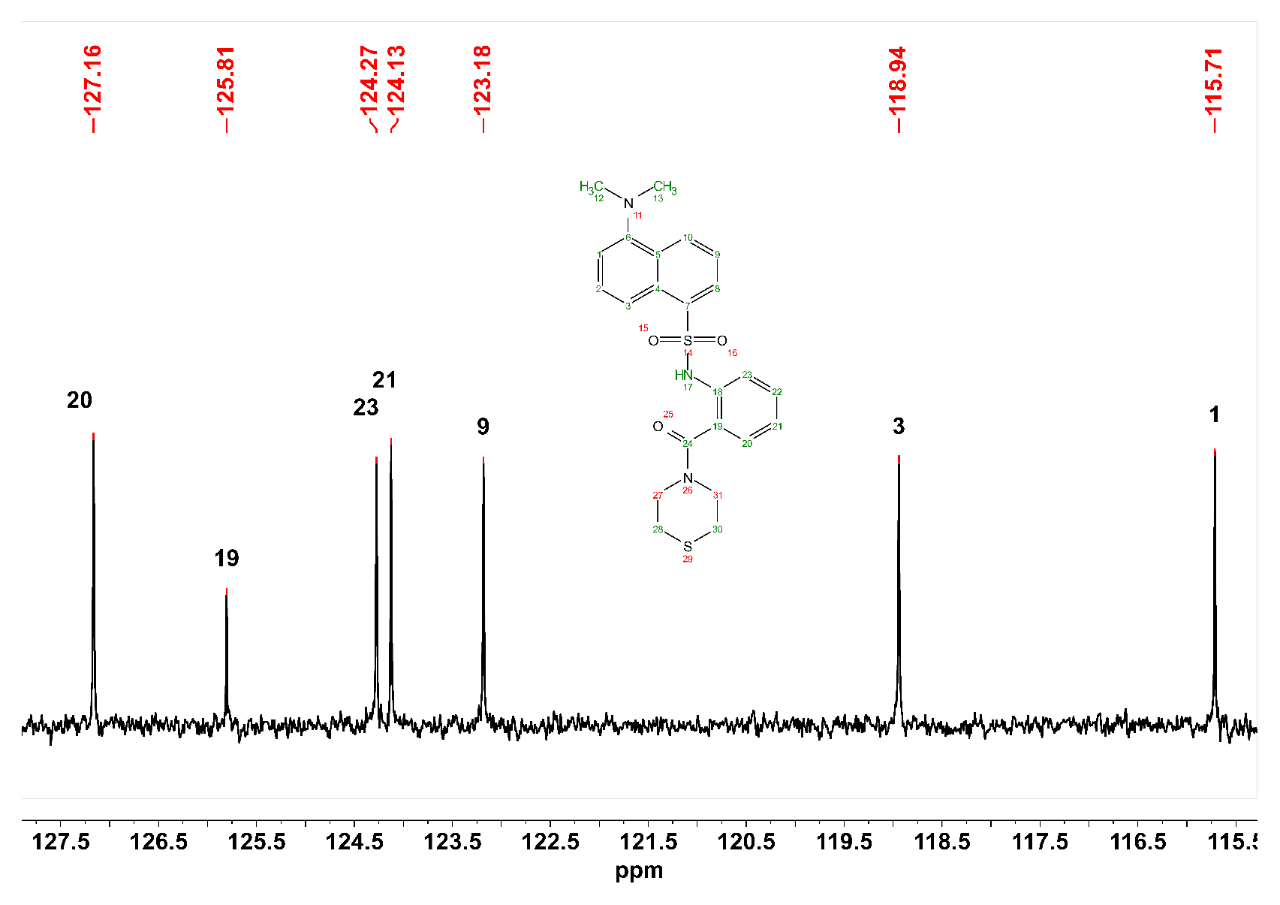


**Figure S2.** 13C-NMR spectrum of compound **2** (details).


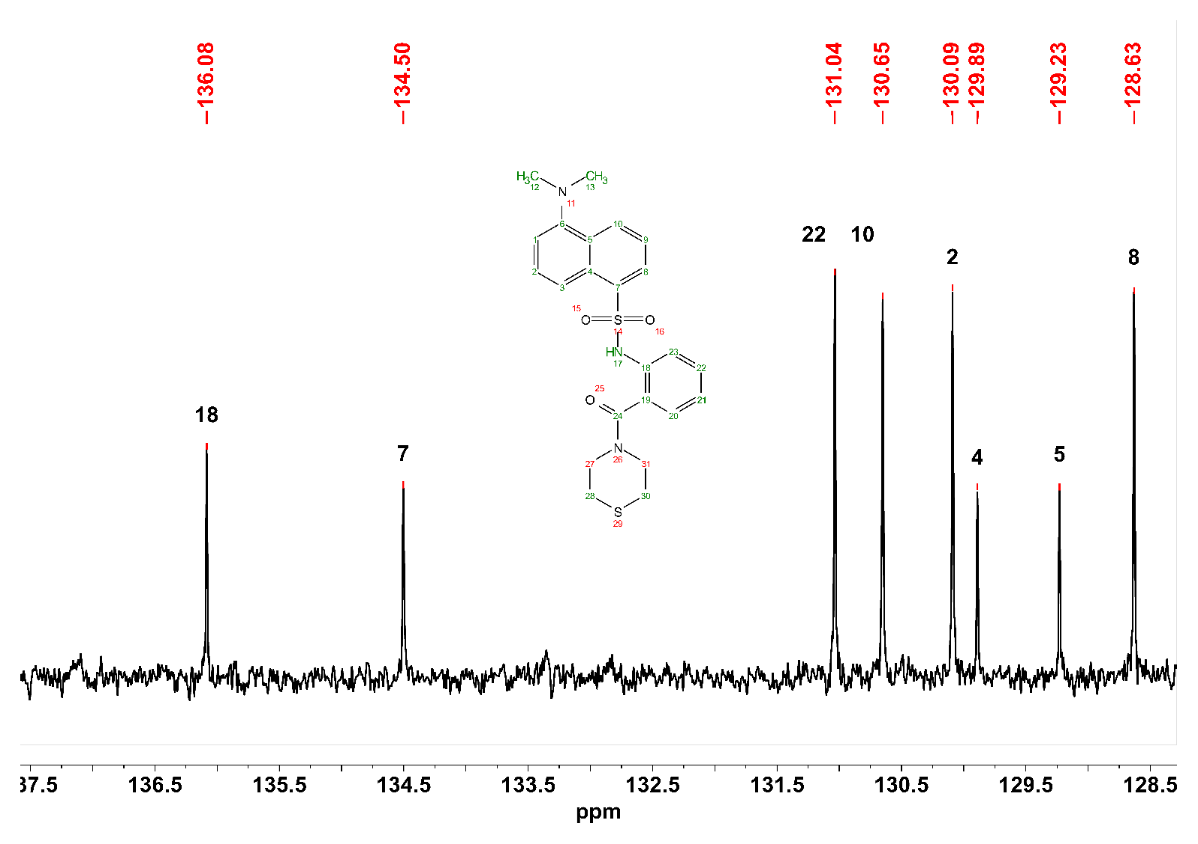


**Figure S2.** 13C-NMR spectrum of compound **2** (details).


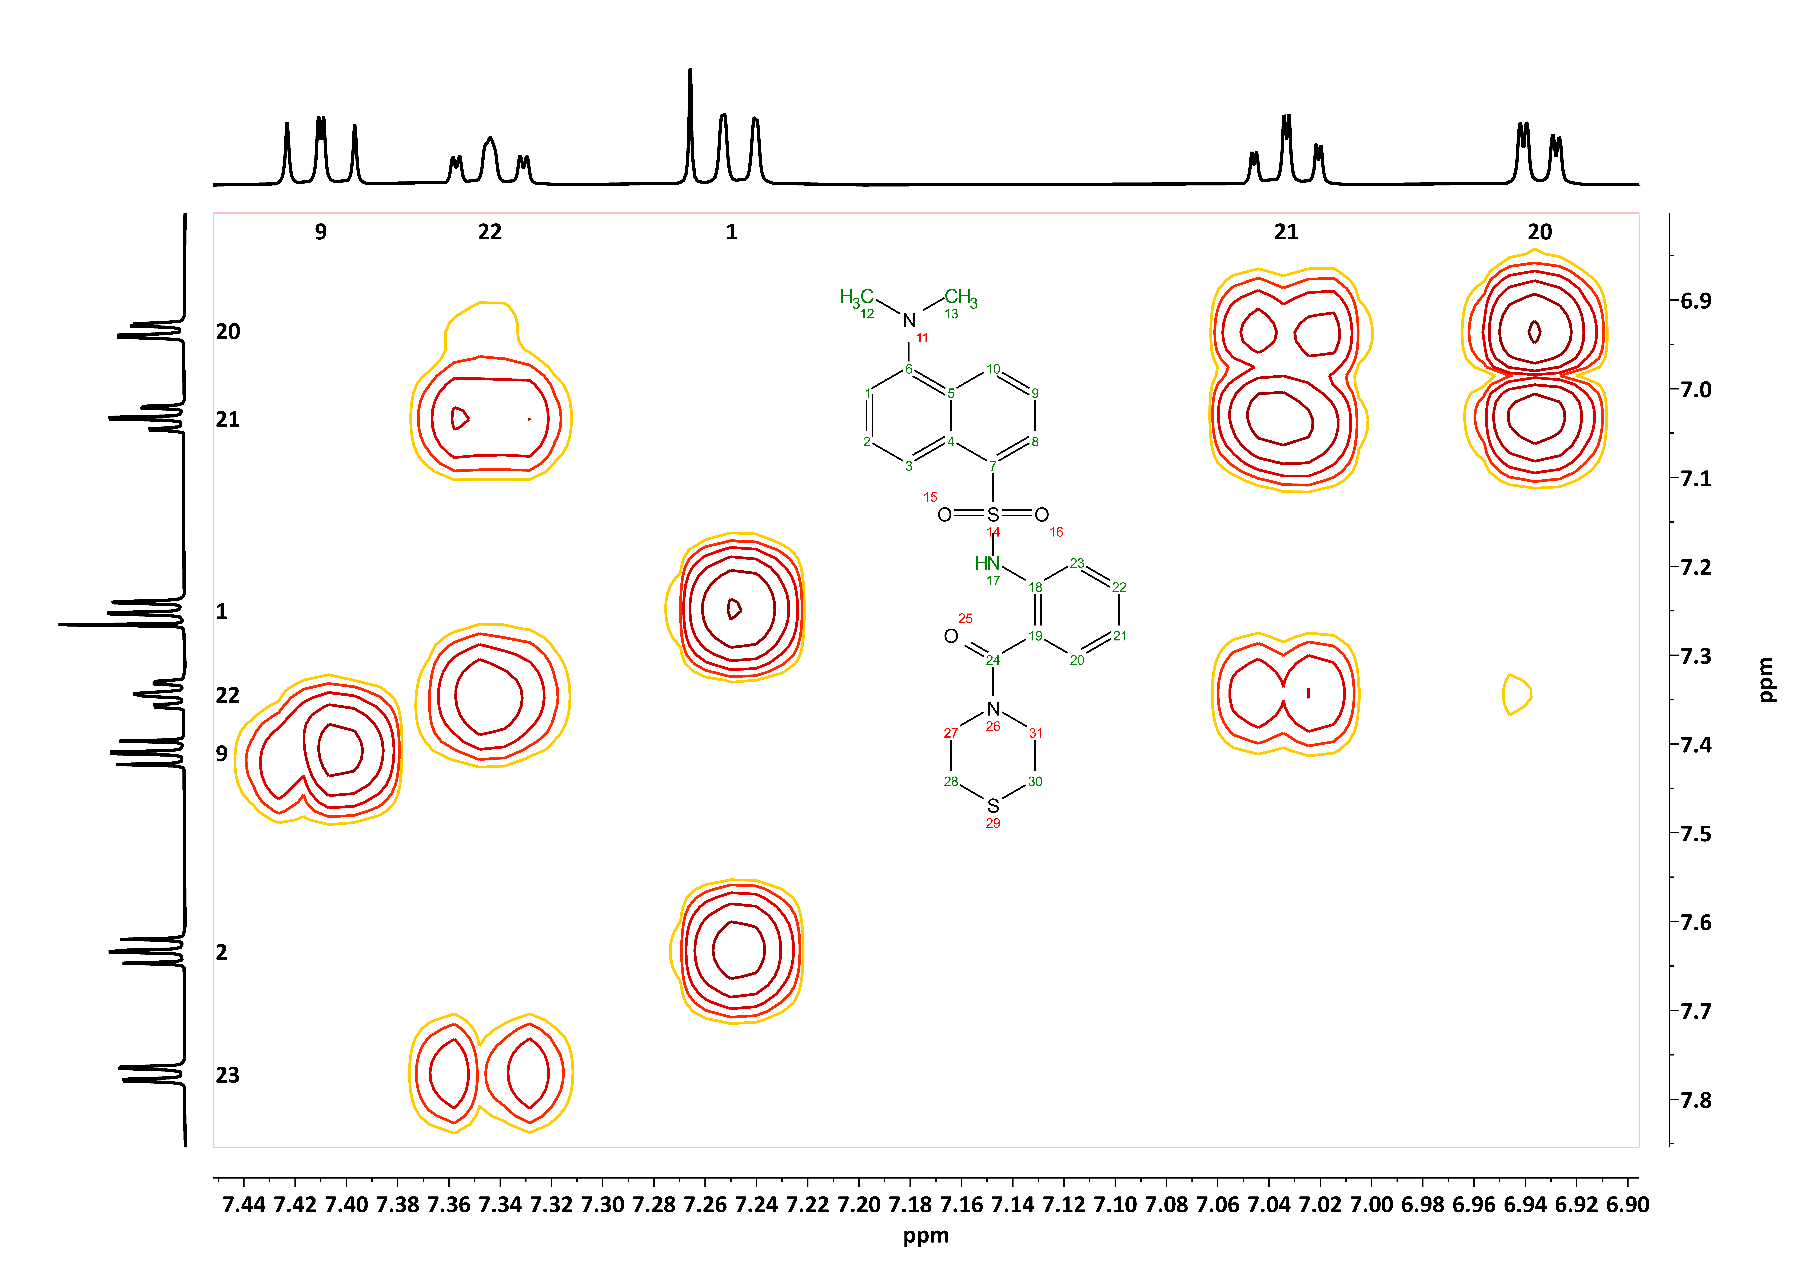


**Figure S2.** COSY-NMR spectrum of **L2.**


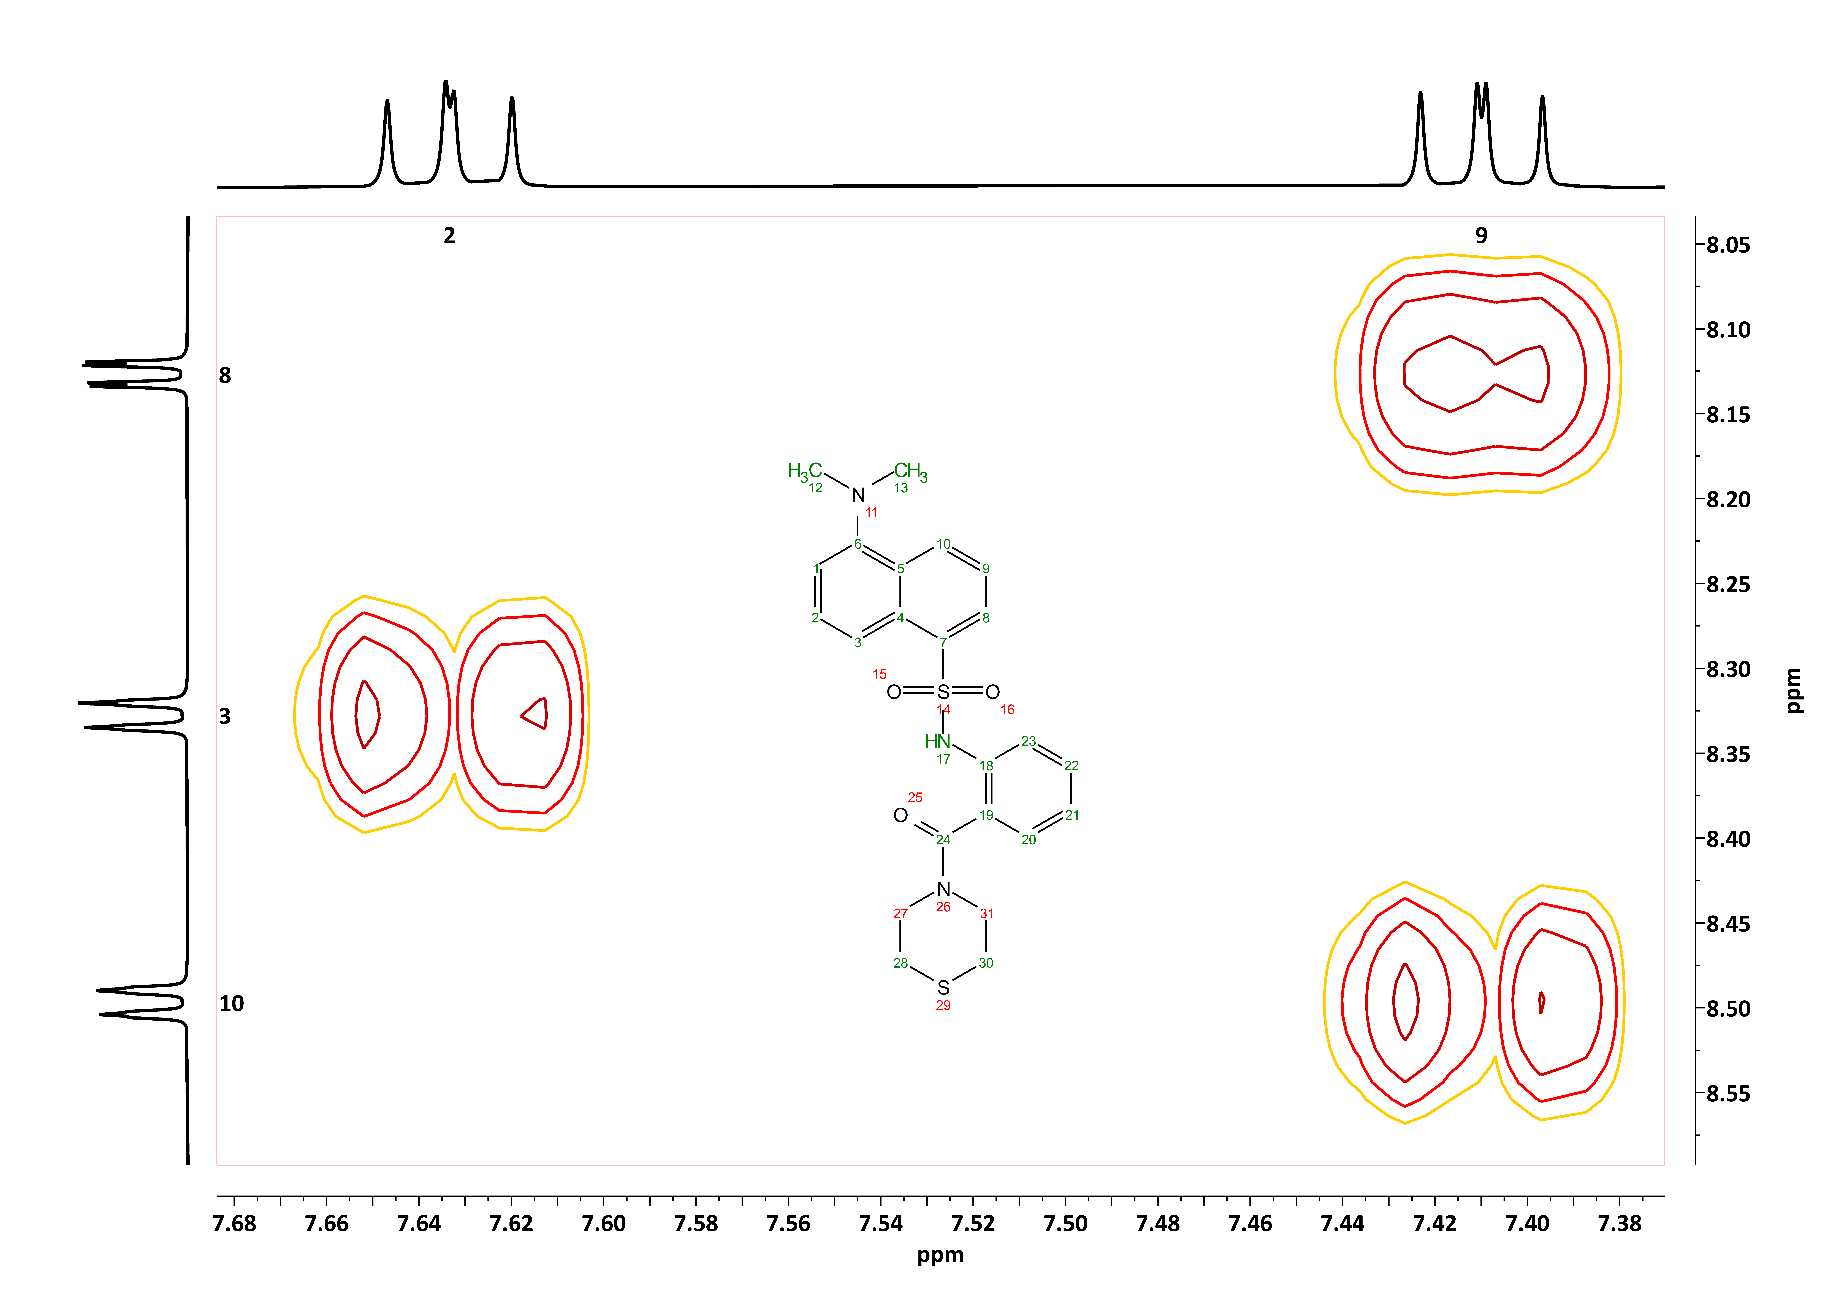


**Figure S2.** COSY-NMR spectrum of **L2.**


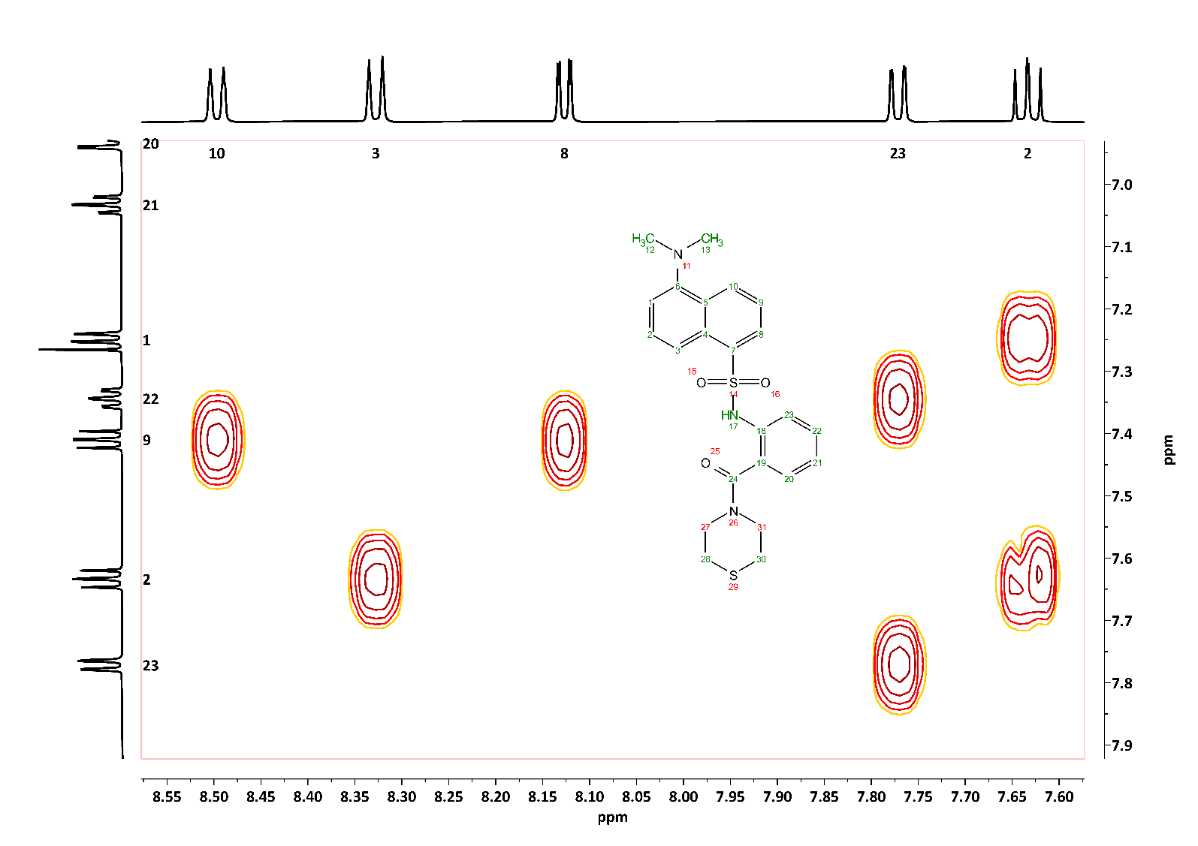


**Figure S2.** COSY-NMR spectrum of **L2.**


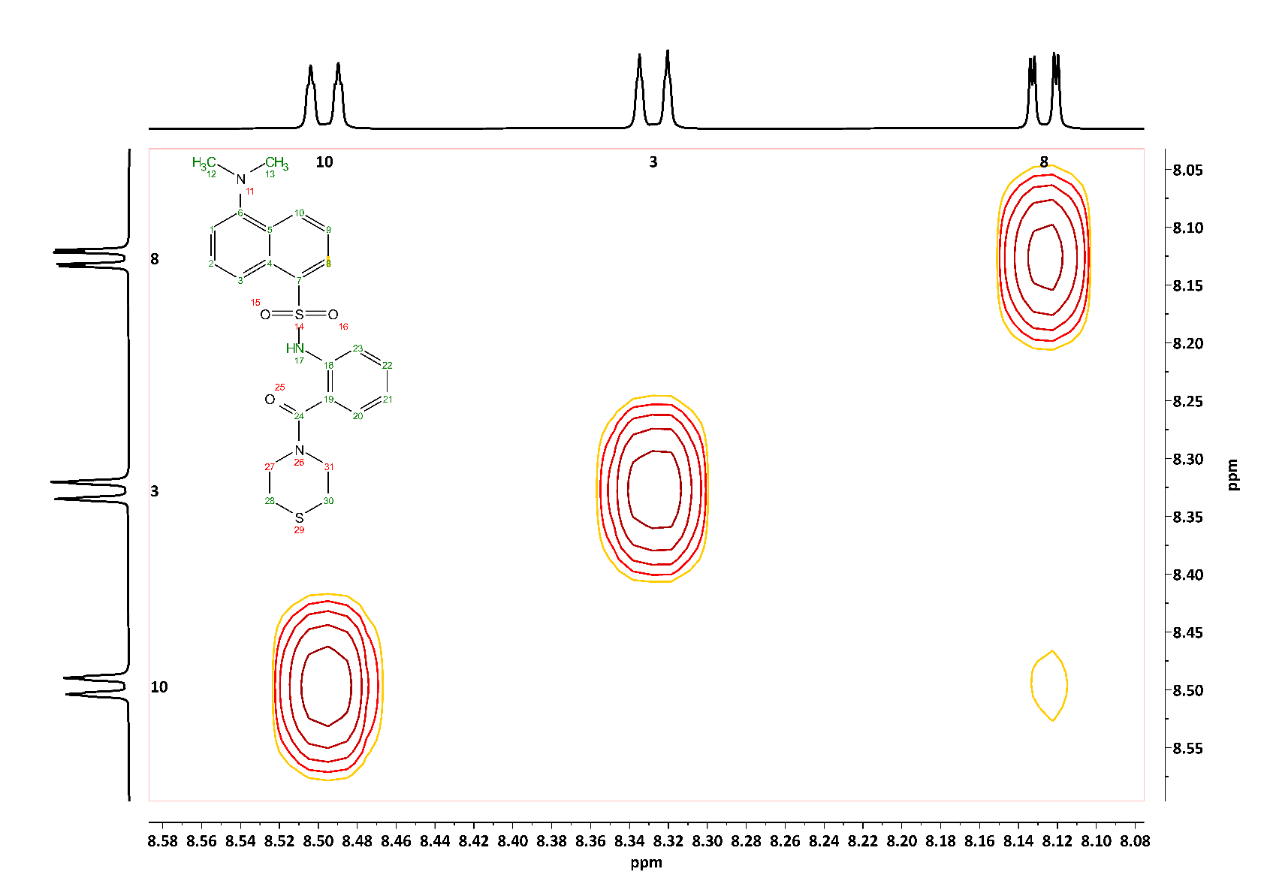


**Figure S2.** COSY-NMR spectrum of **L2.**


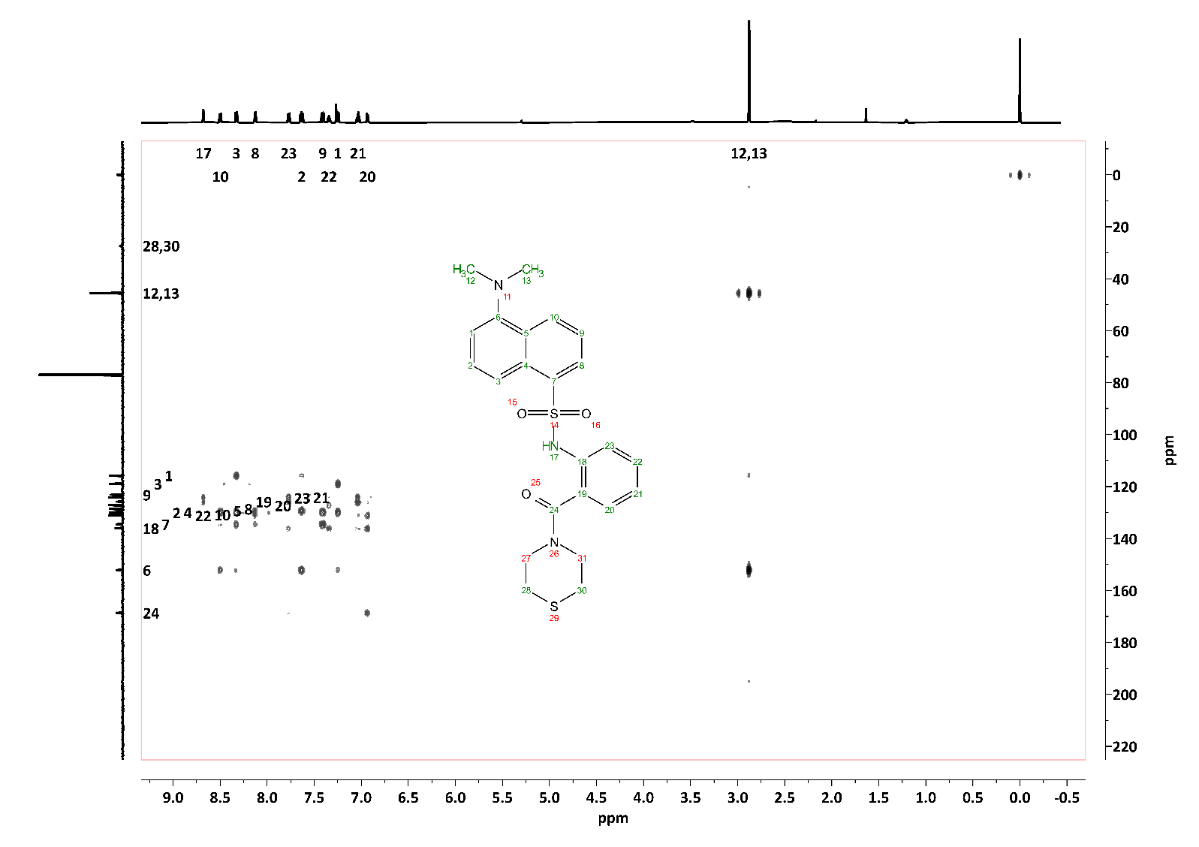


**Figure S2.** HSQC-NMR spectrum of **L2.**


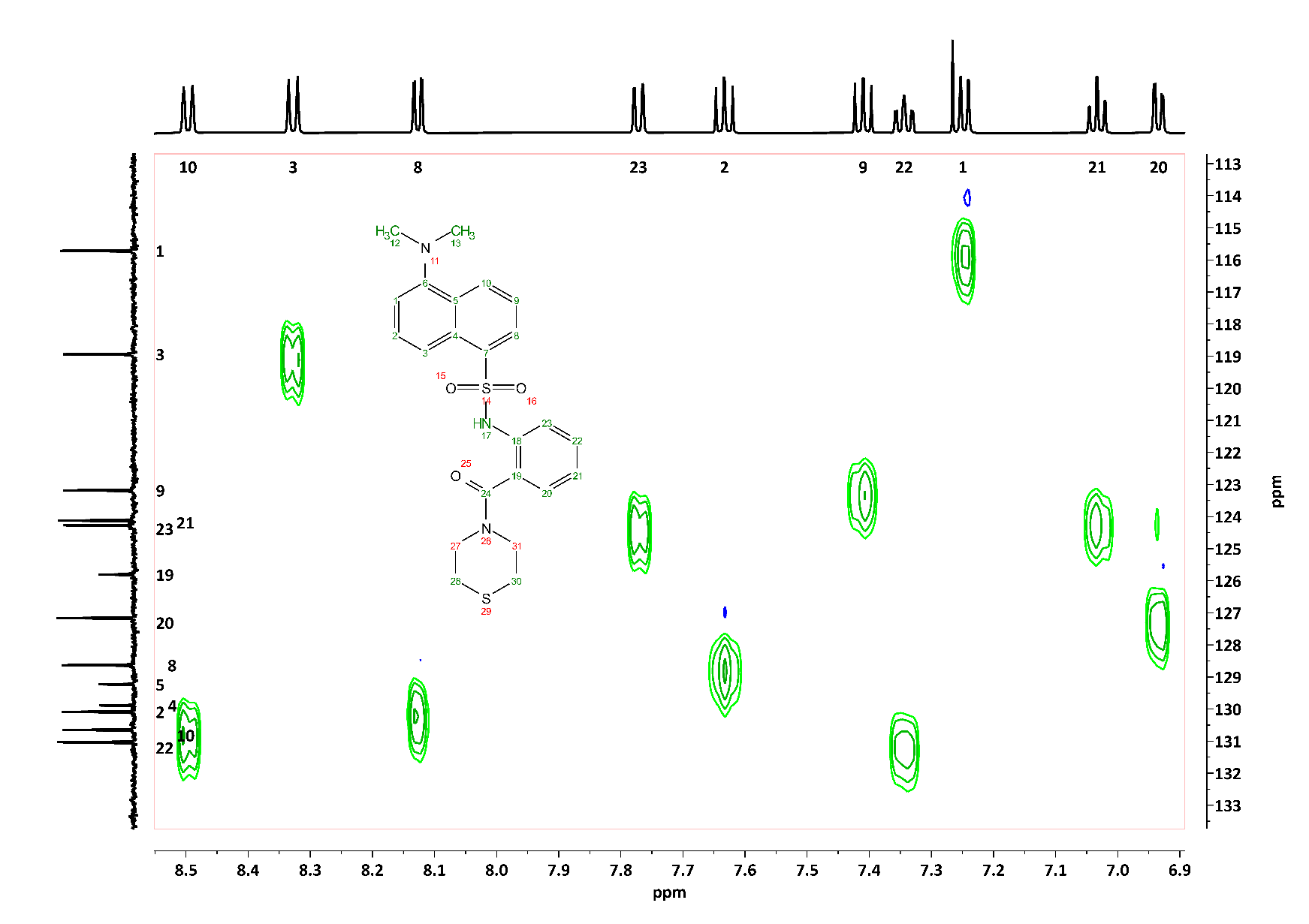


**Figure S2.** HSQC-NMR spectrum of **L2.**


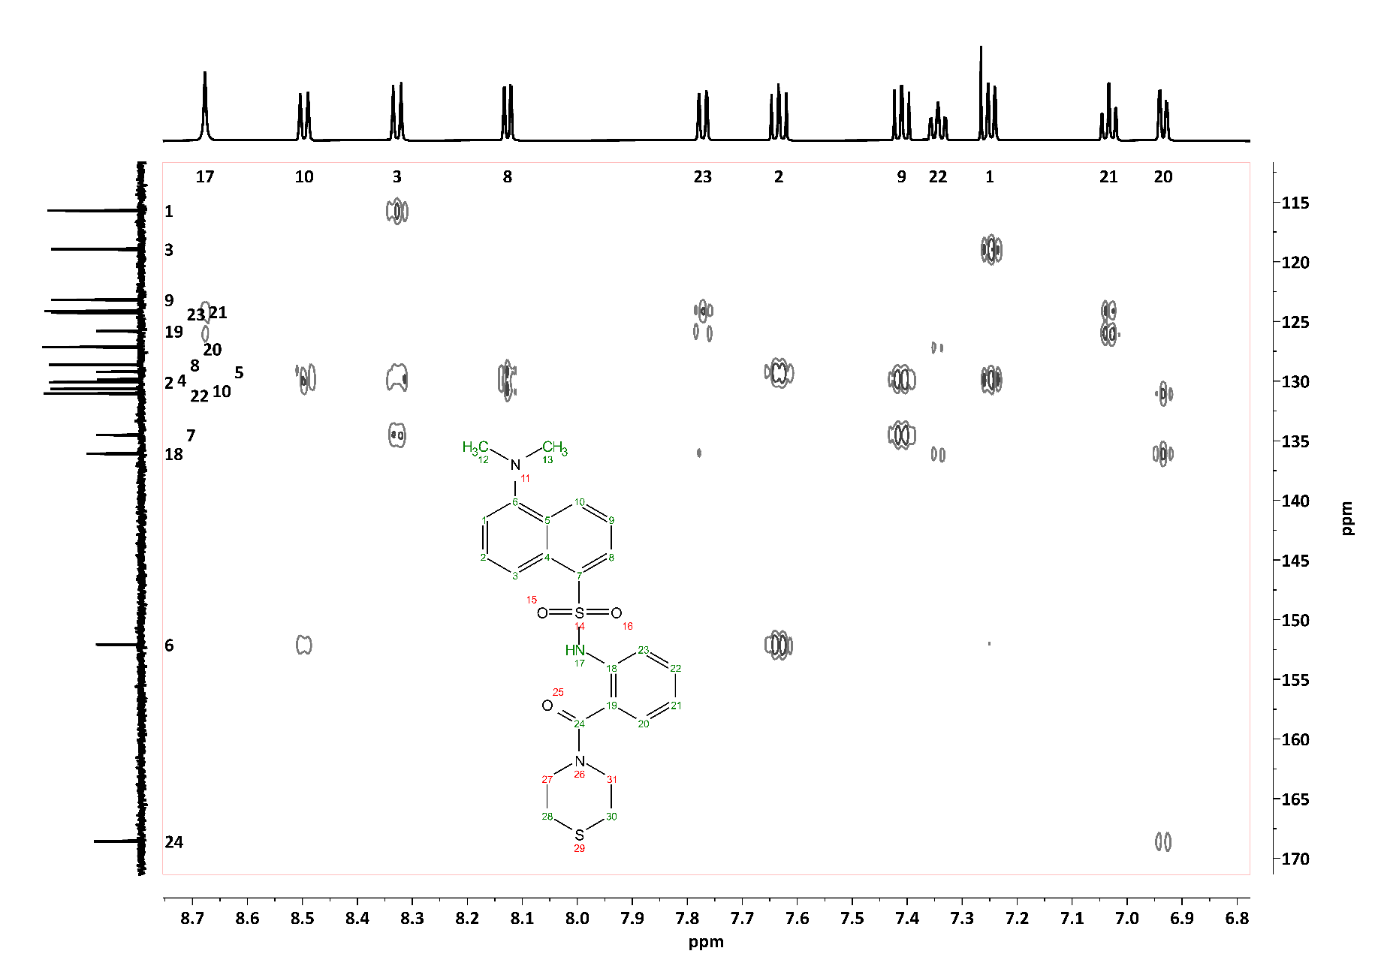


**Figure S2.** HSQC-NMR spectrum of **L2.**


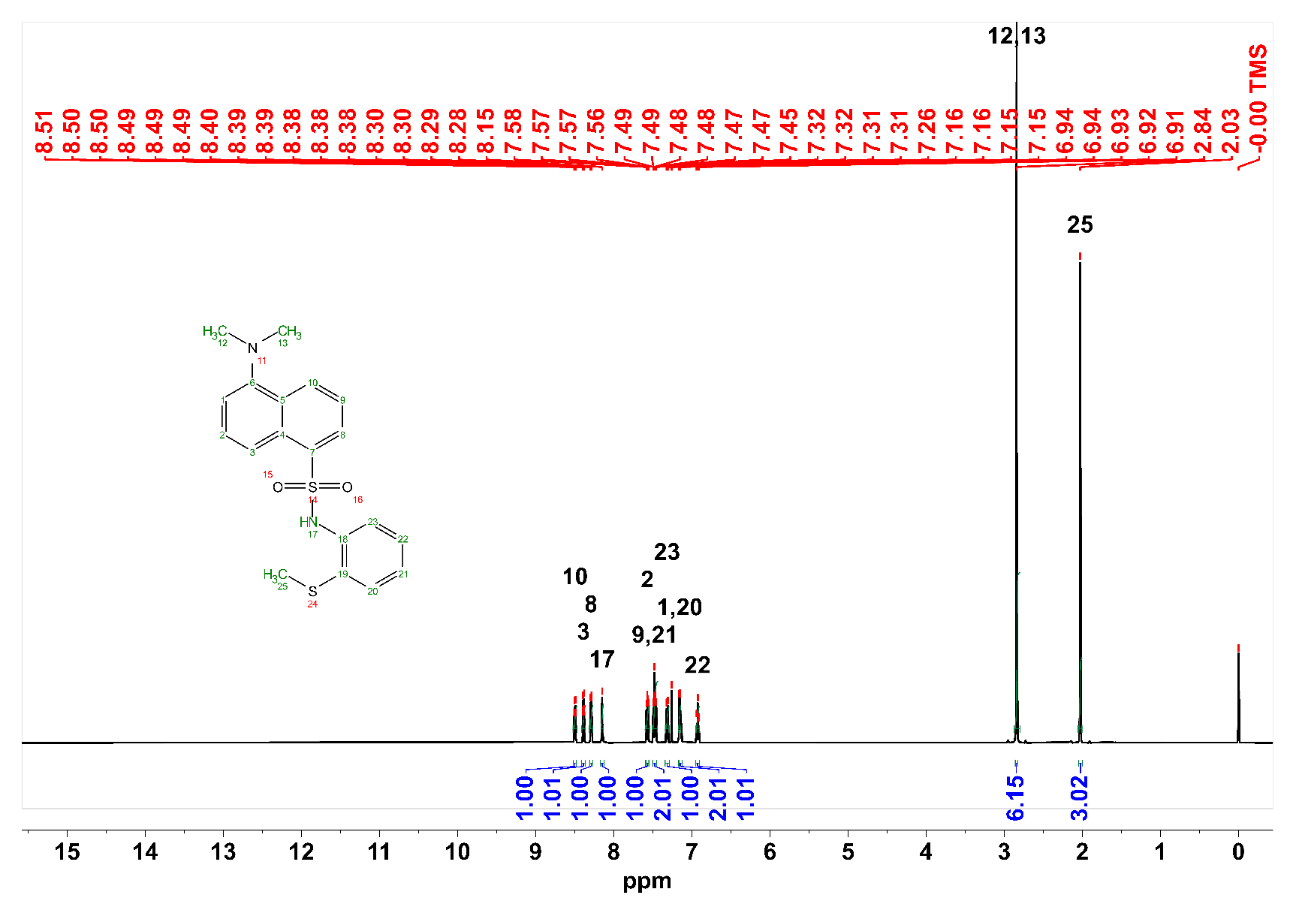


**Figure S3.** 1H NMR spectrum of **L3**.


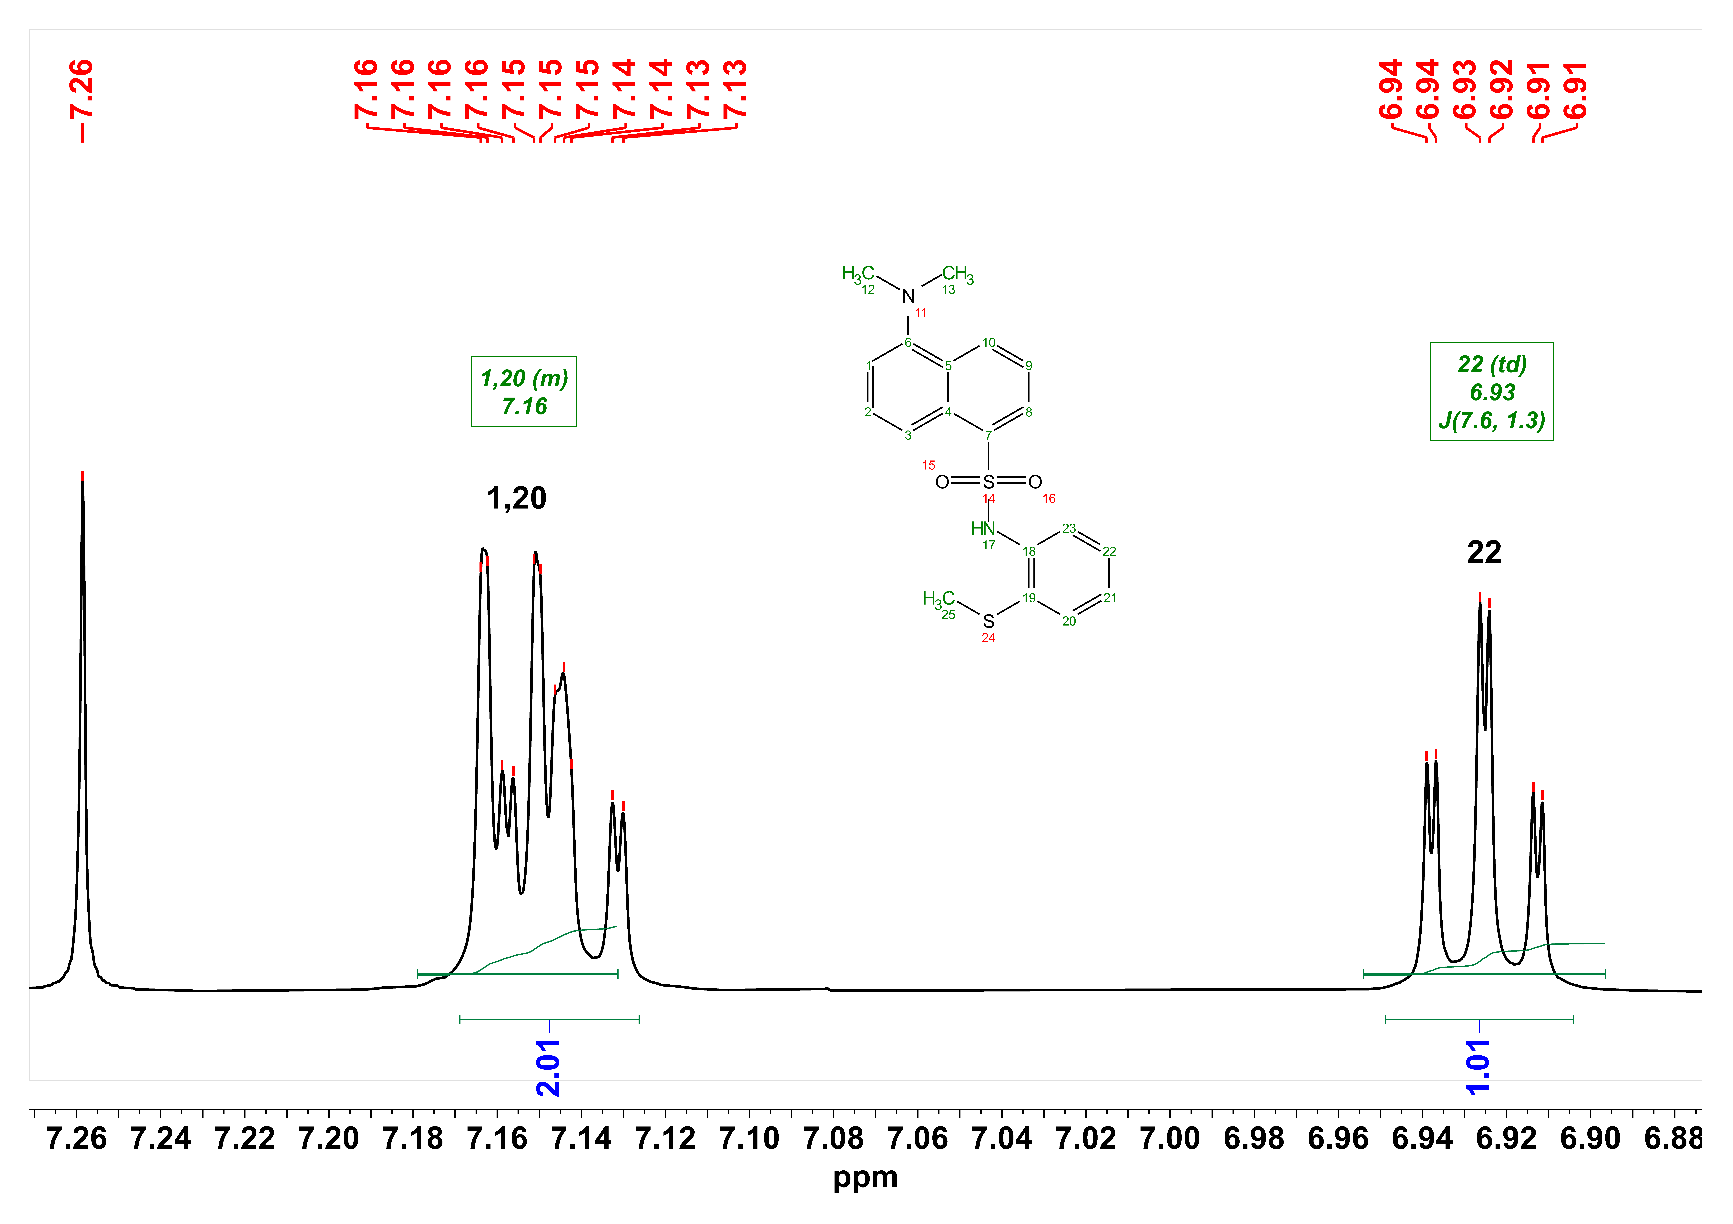


**Figure S3.** 1H NMR spectrum of **L3** (details).


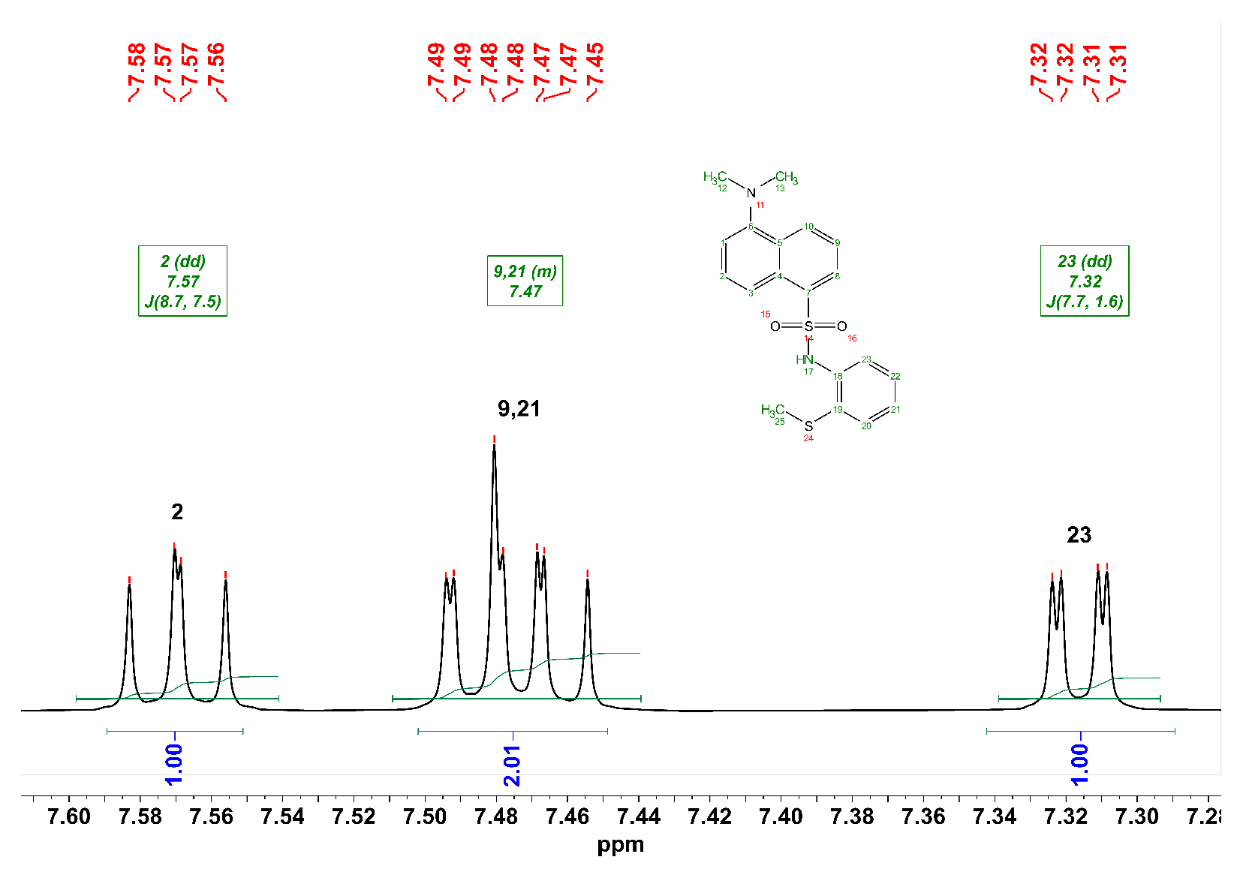


**Figure S3.** 1H NMR spectrum of **L3** (details).


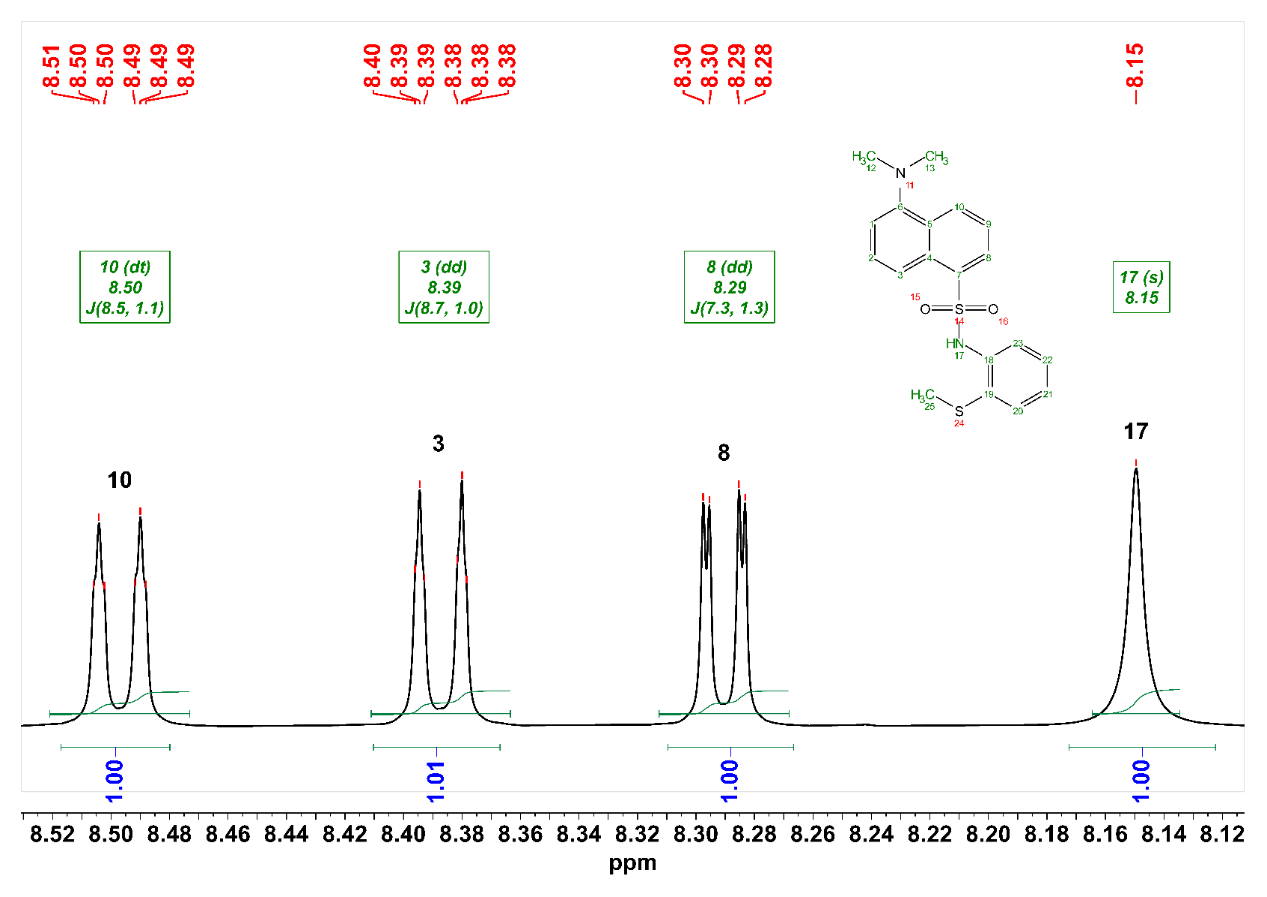


**Figure S3.** 1H NMR spectrum of **L3** (details).


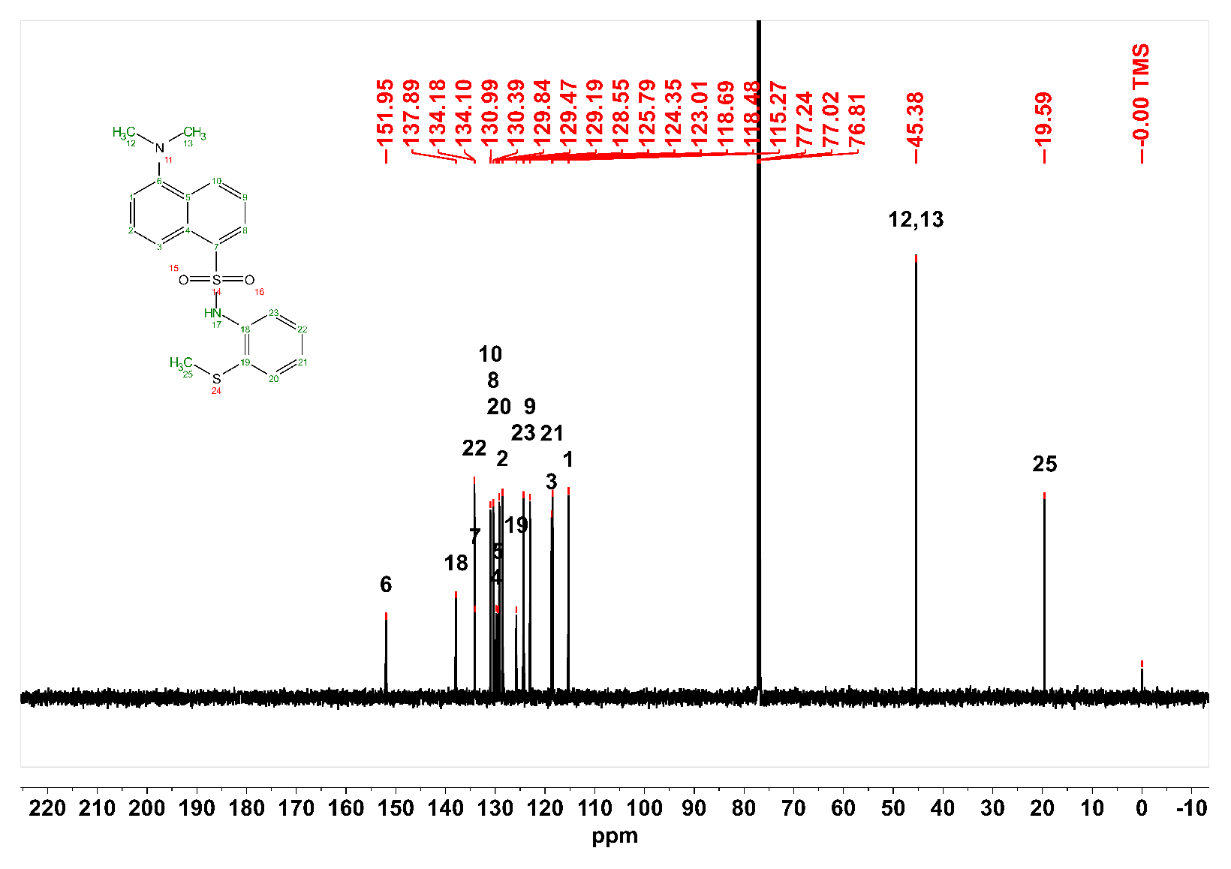


**Figure S3.** 13C NMR spectrum of **L3**.


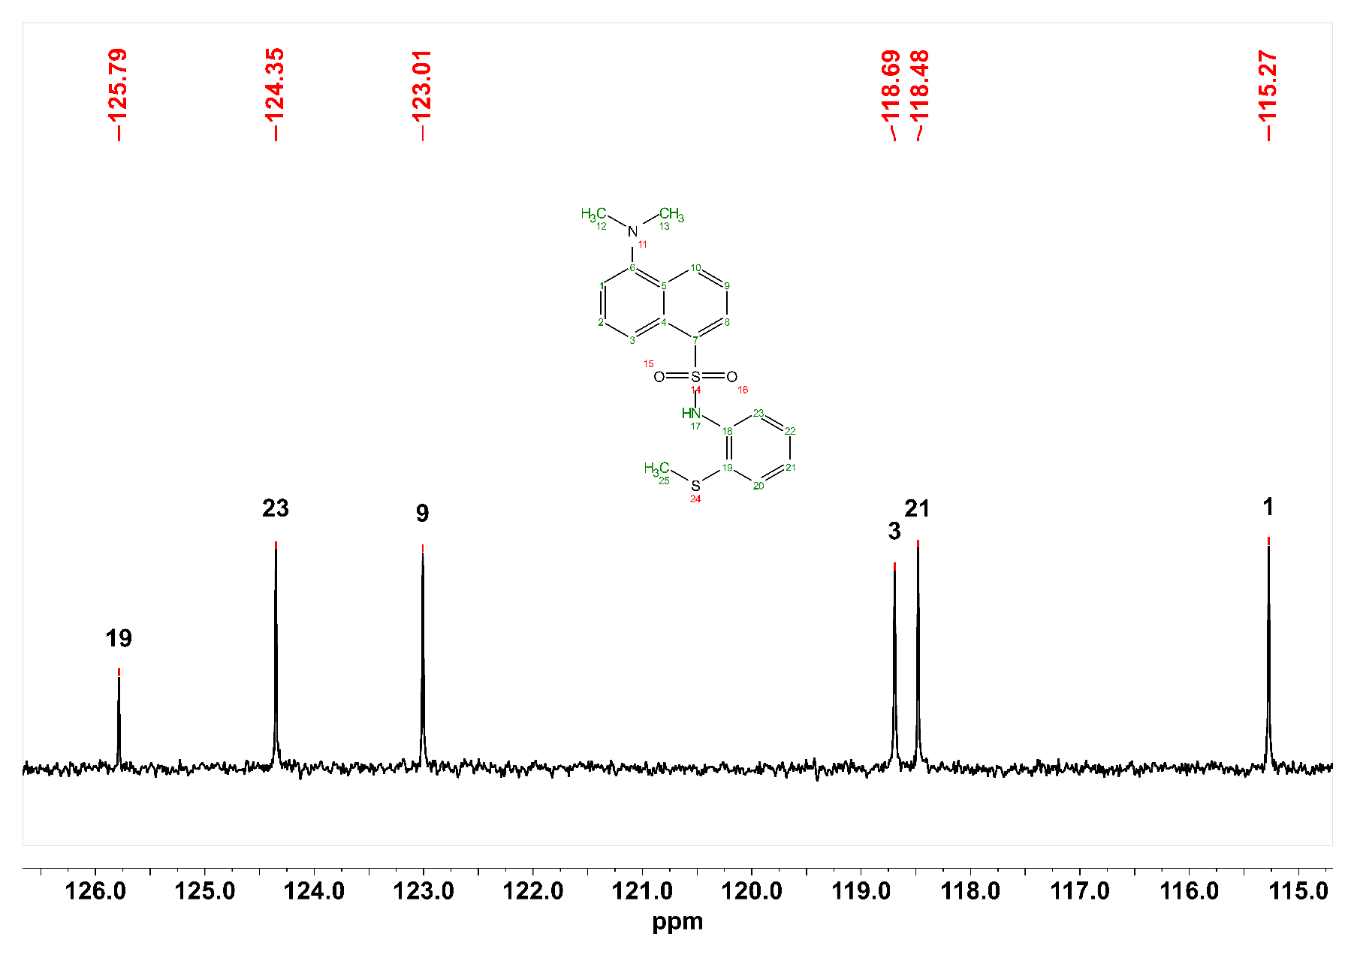


**Figure S3.** 13C NMR spectrum of **L3** (details).


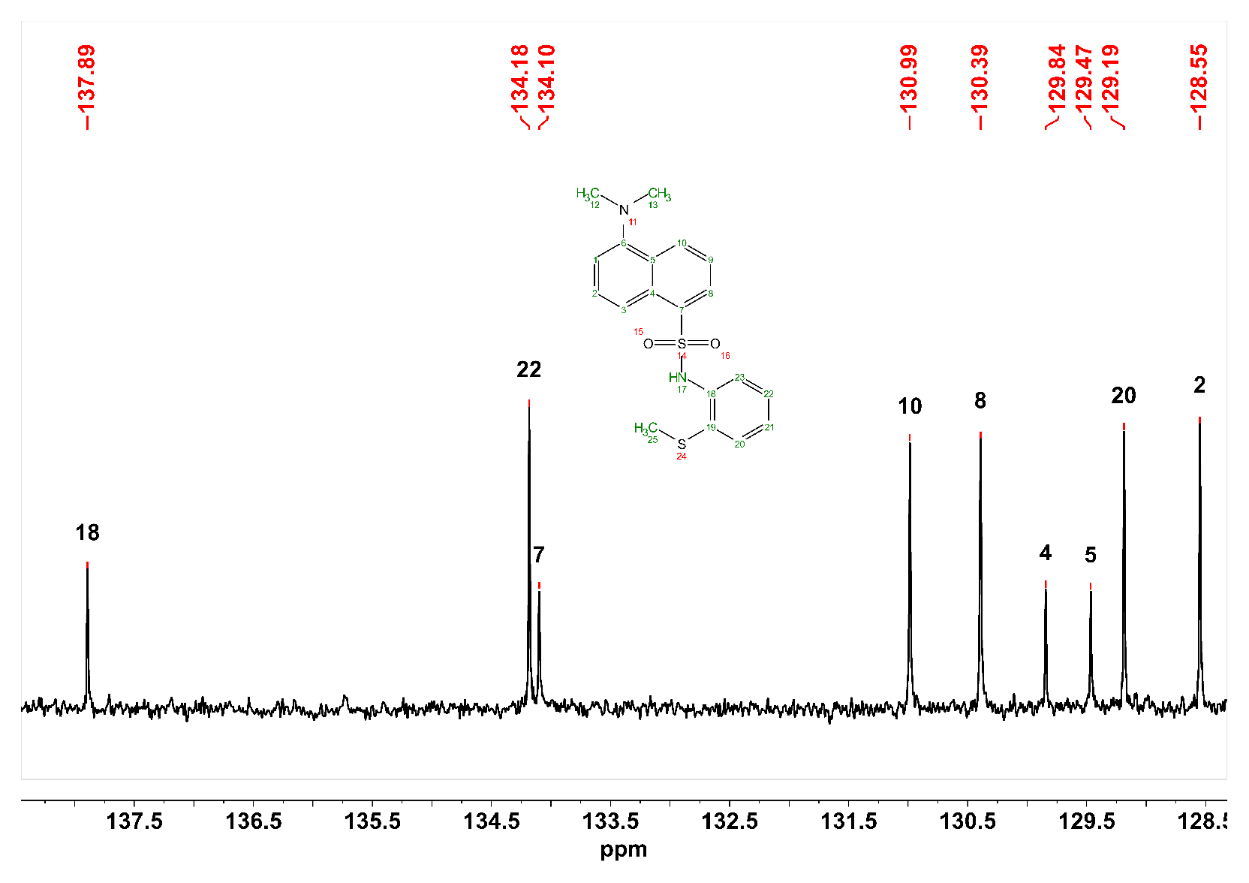


**Figure S3.** 13C NMR spectrum of **L3** (details).


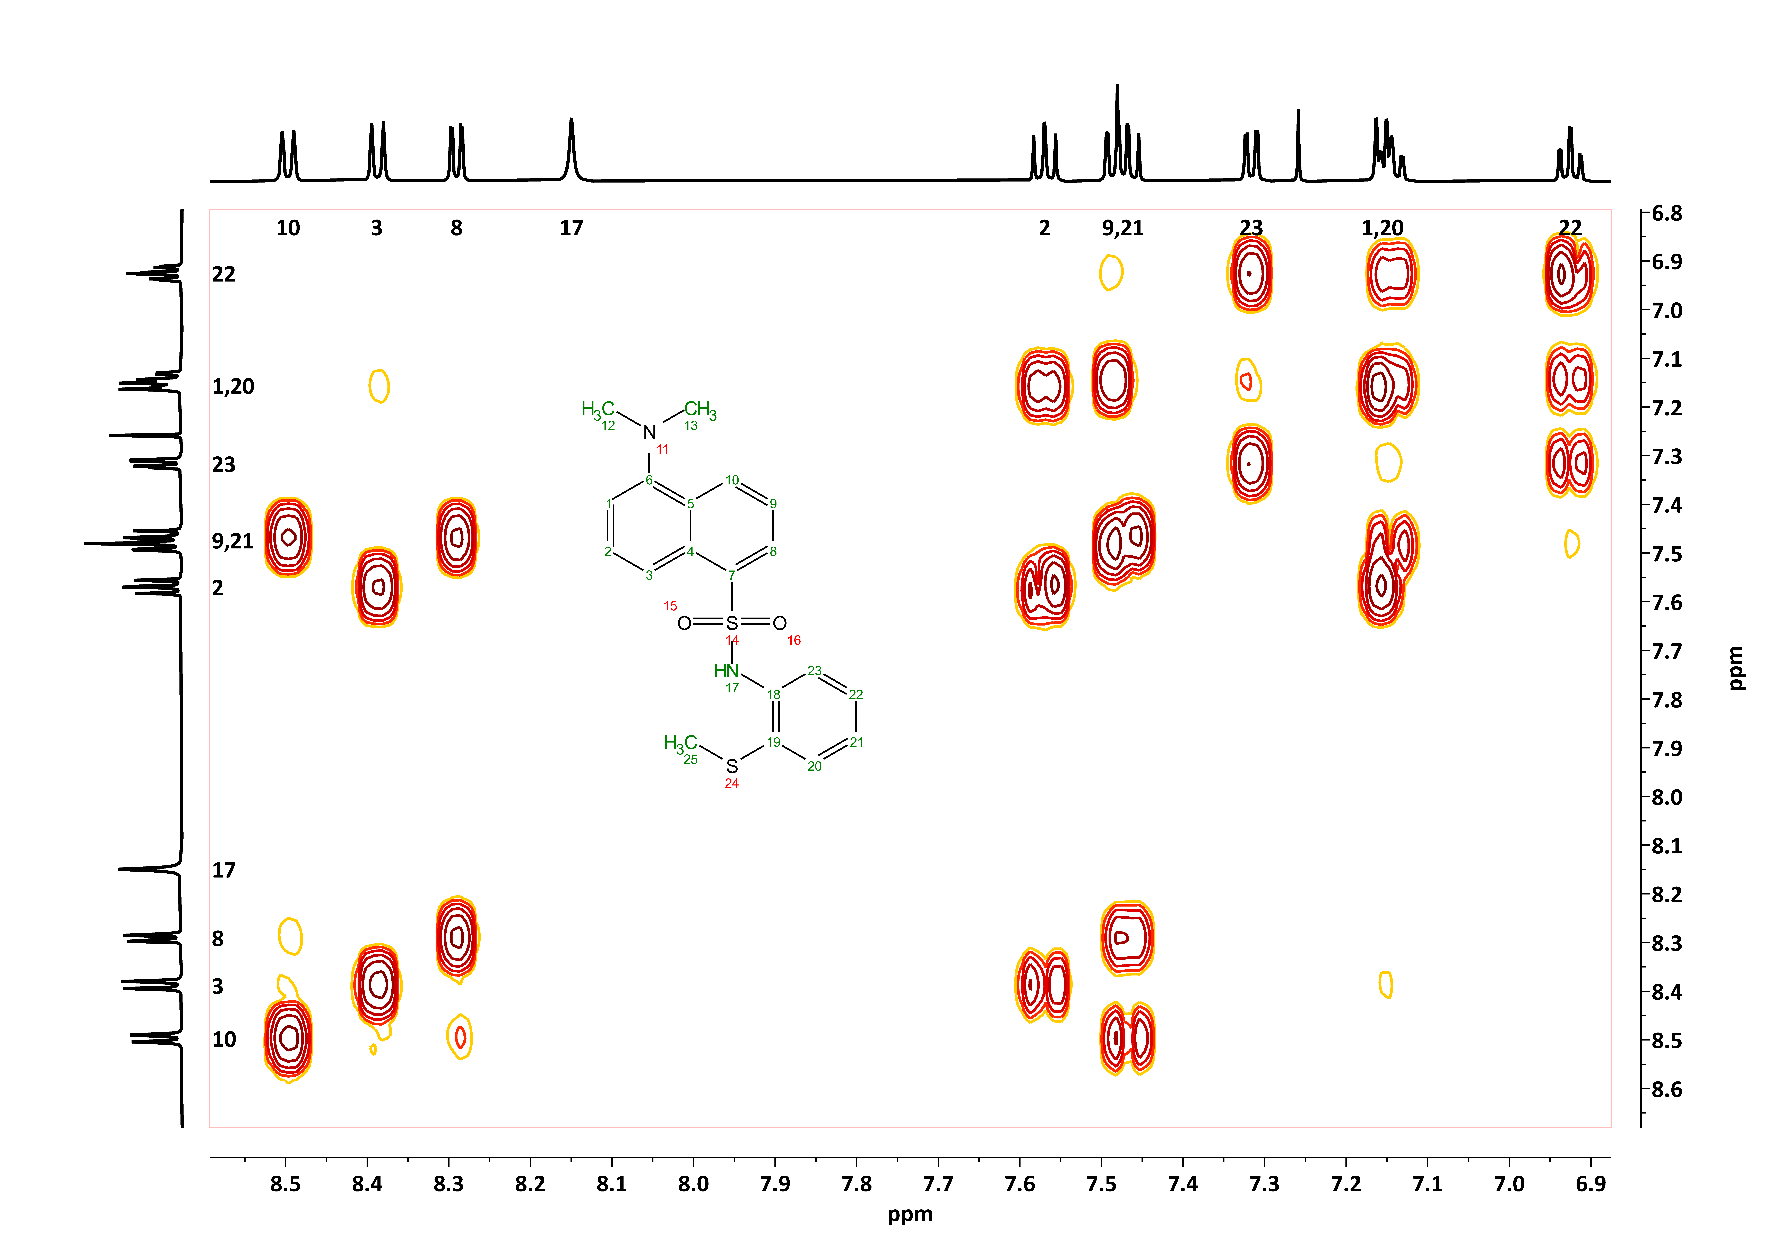


**Figure S3.** COSY NMR spectrum of **L3**.


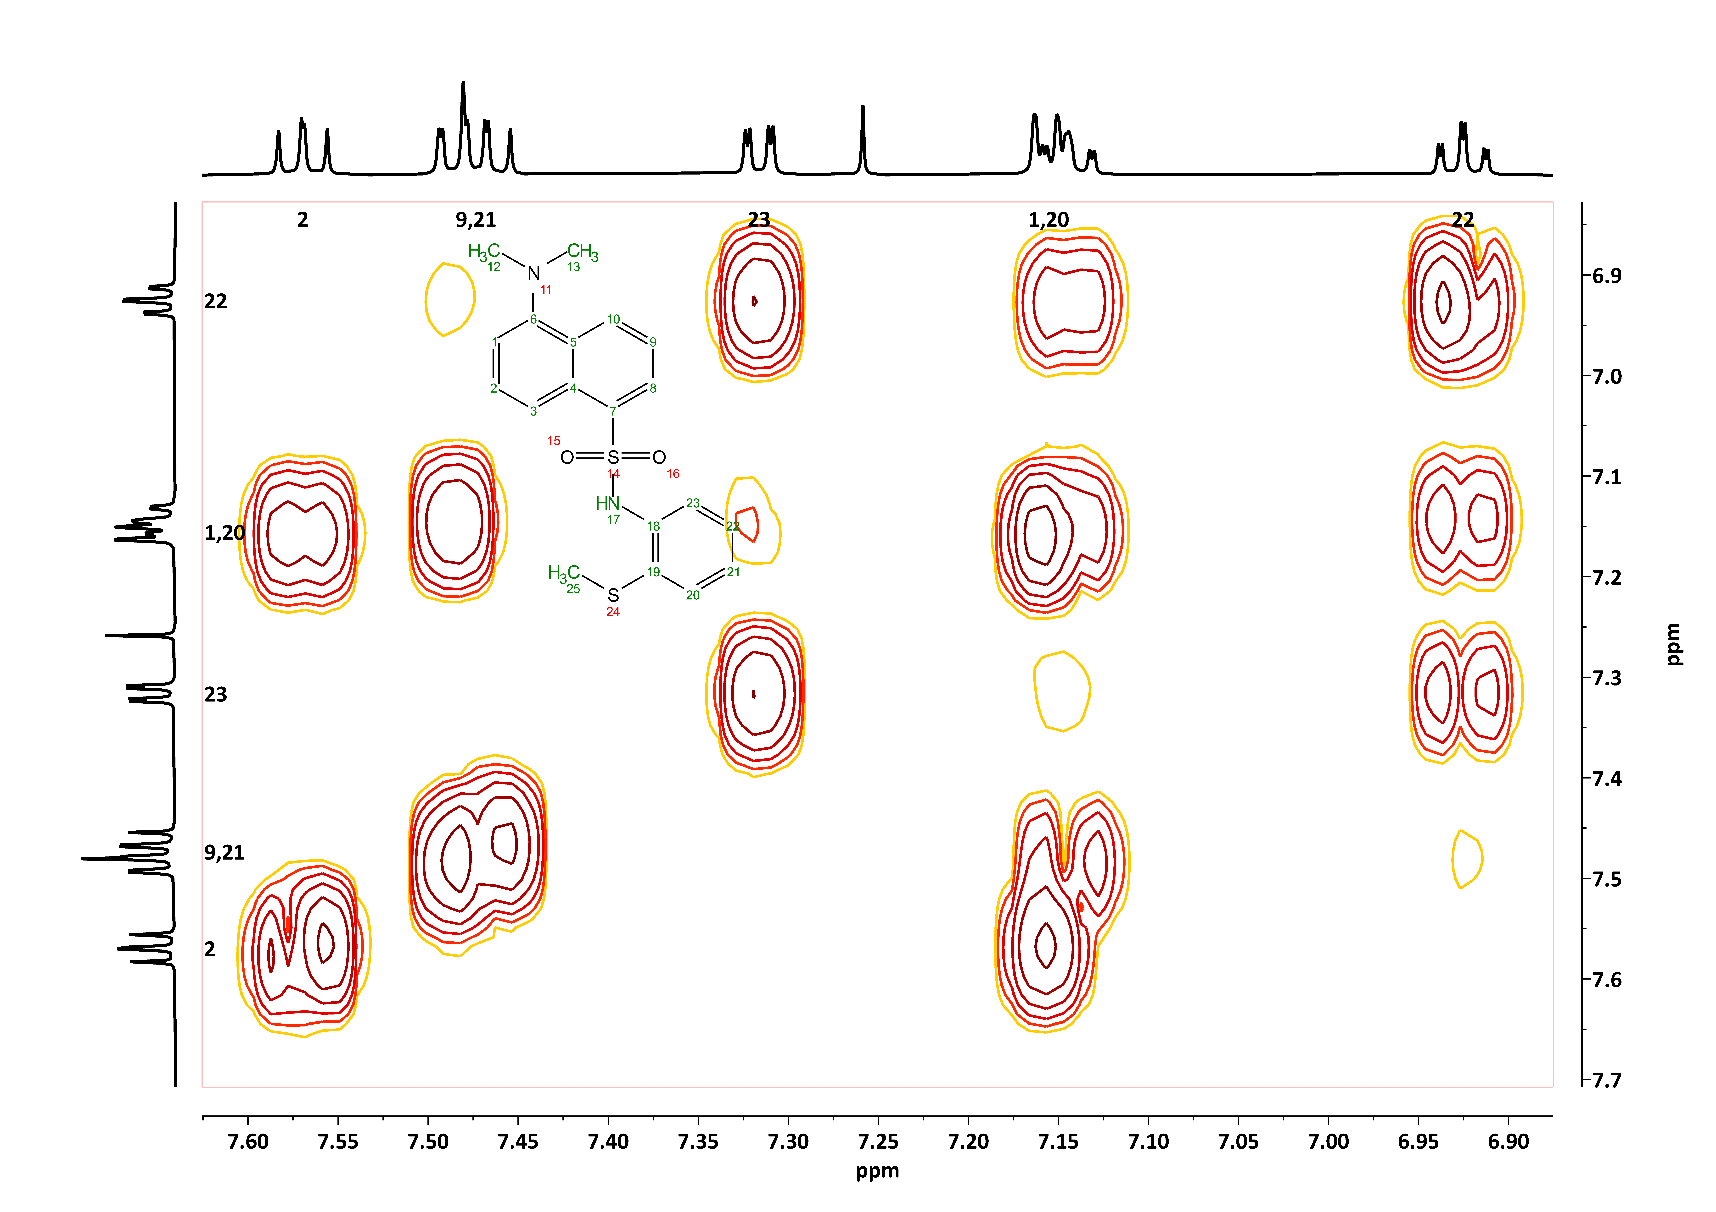


**Figure S3.** COSY NMR spectrum of **L3**.


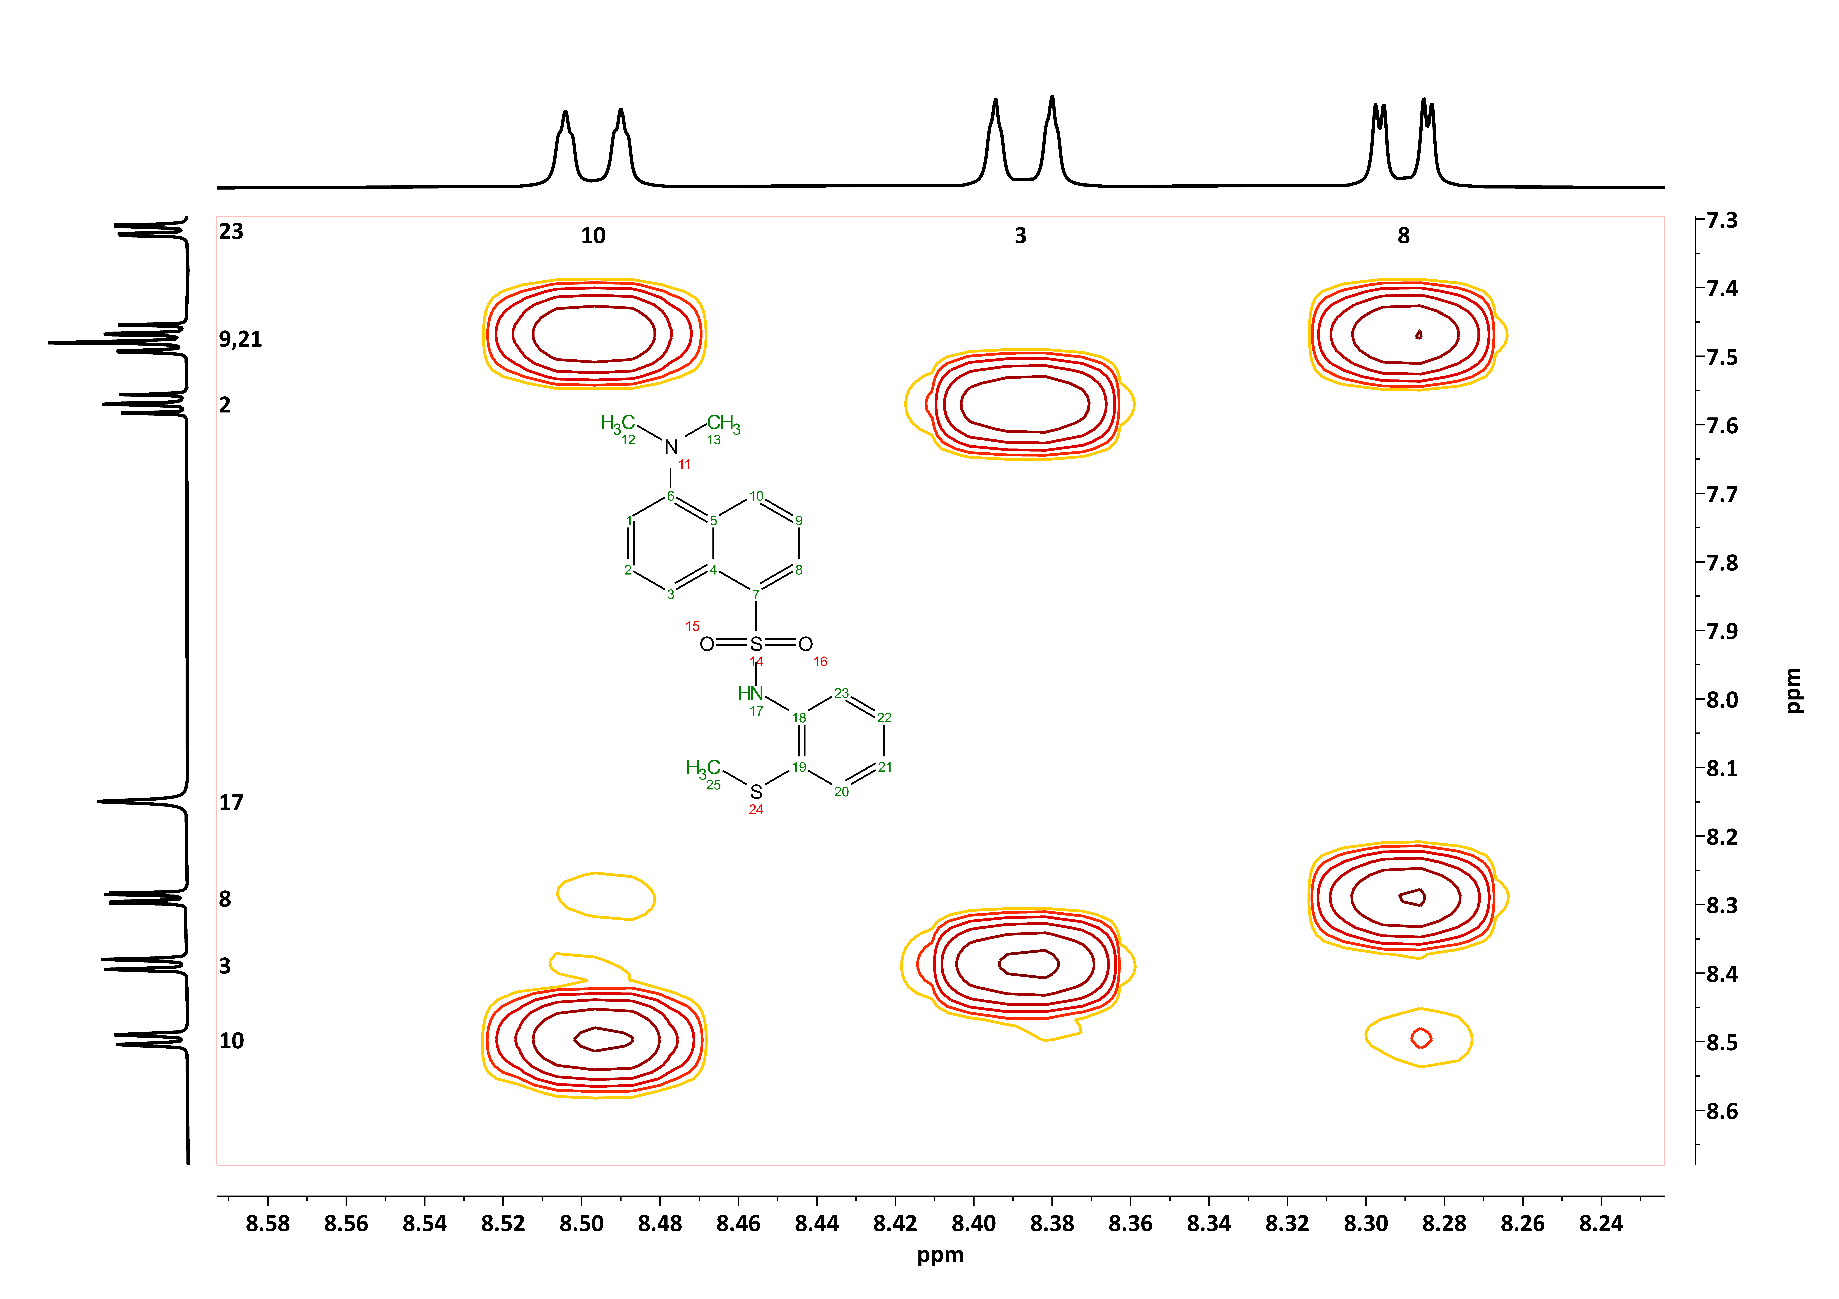


**Figure S3.** COSY NMR spectrum of **L3**.


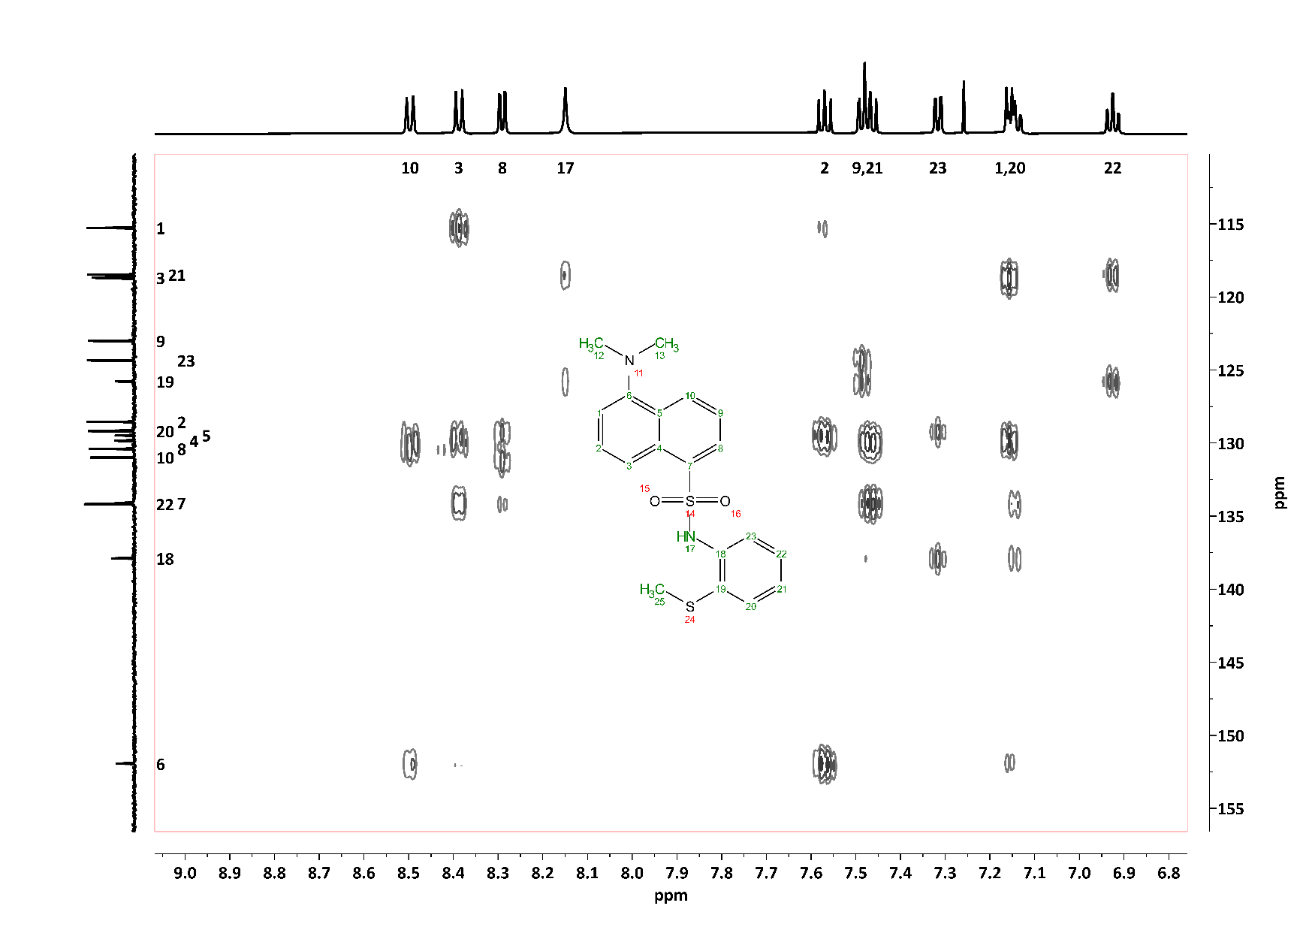


**Figure S3.** HSQC NMR spectrum of **L3**.


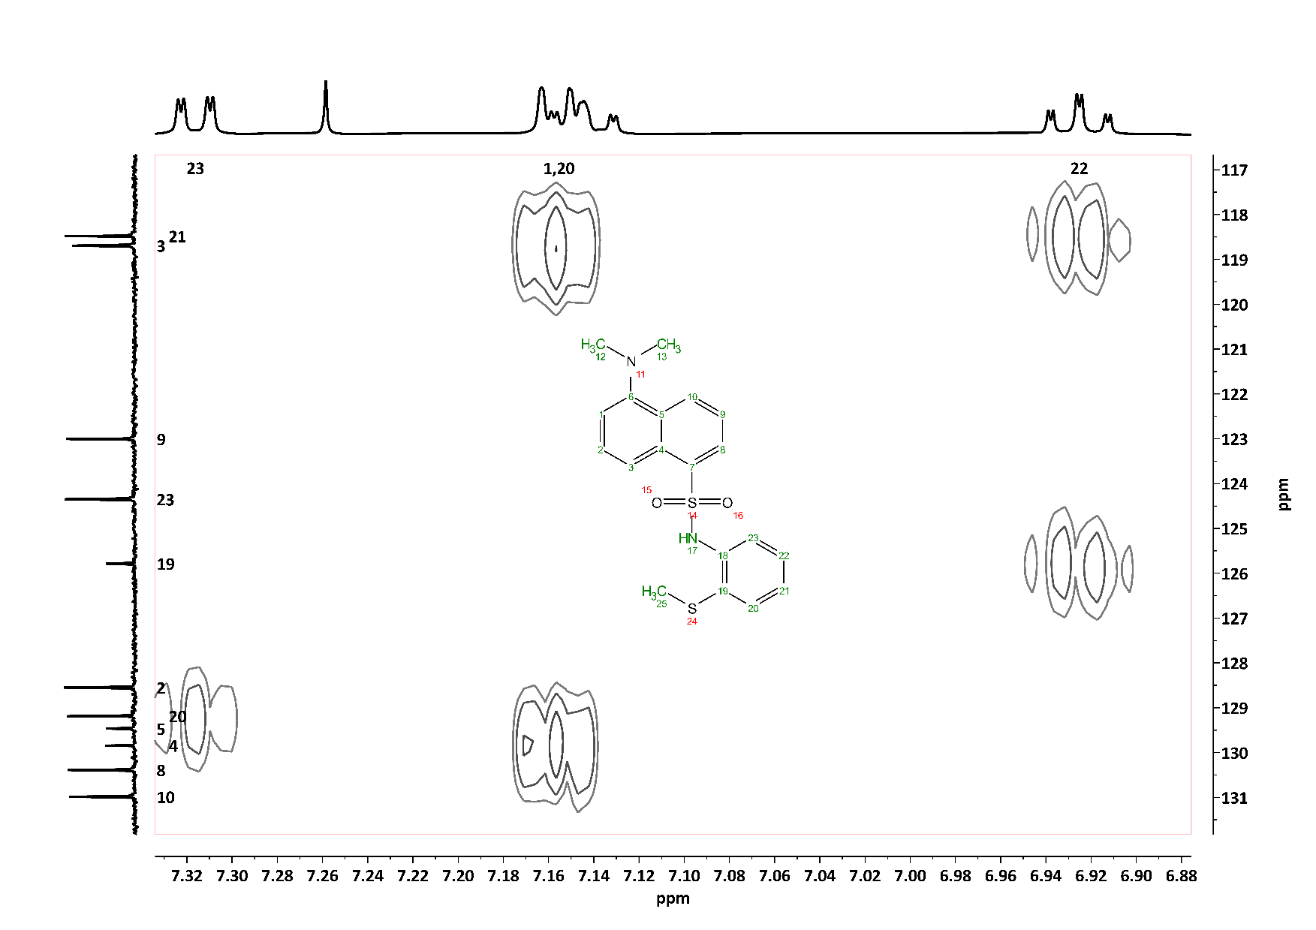


**Figure S3.** HSQC NMR spectrum of **L3**.F**igure S3-12.** HSQC NMR spectrum of **L3**. .


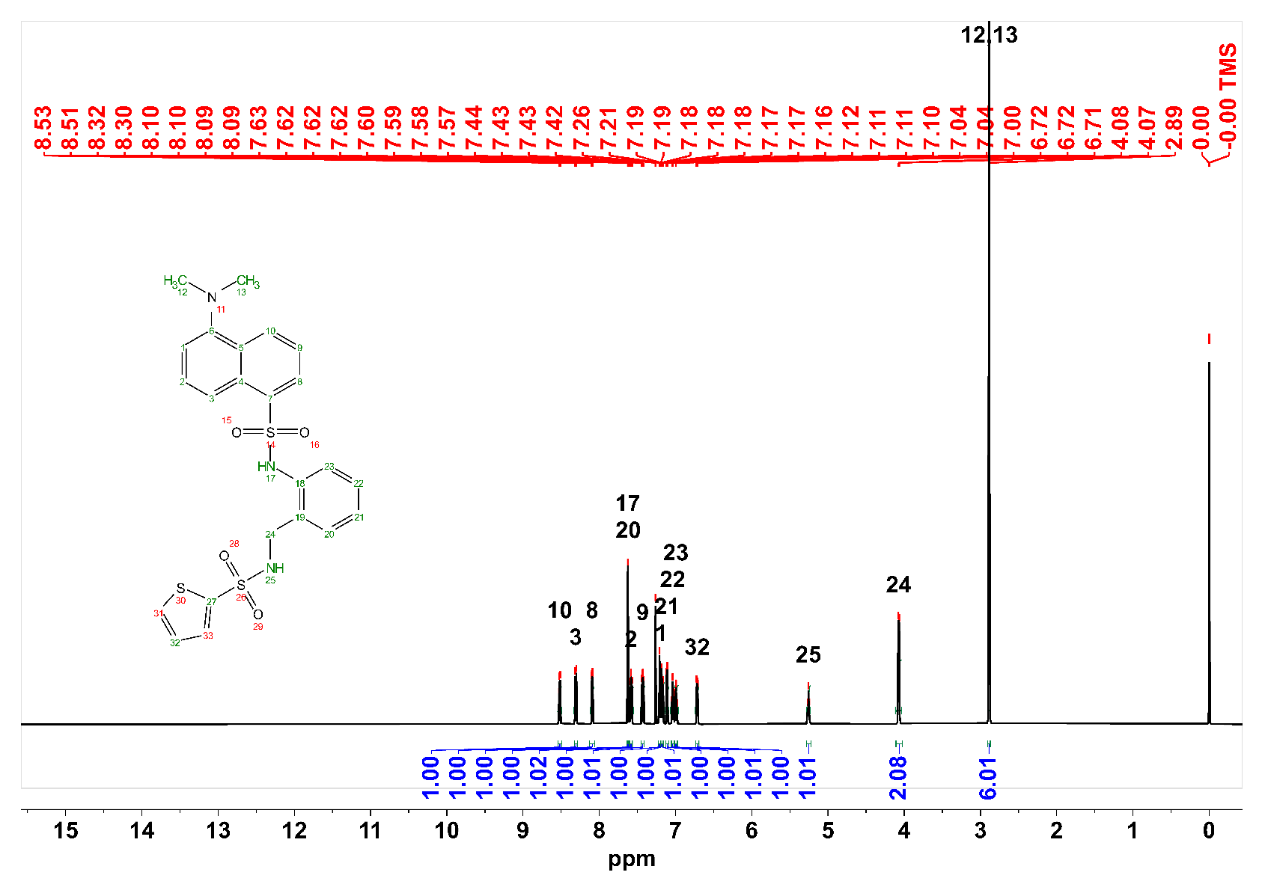


**Figure S4.** 1H NMR spectrum of **L4**.


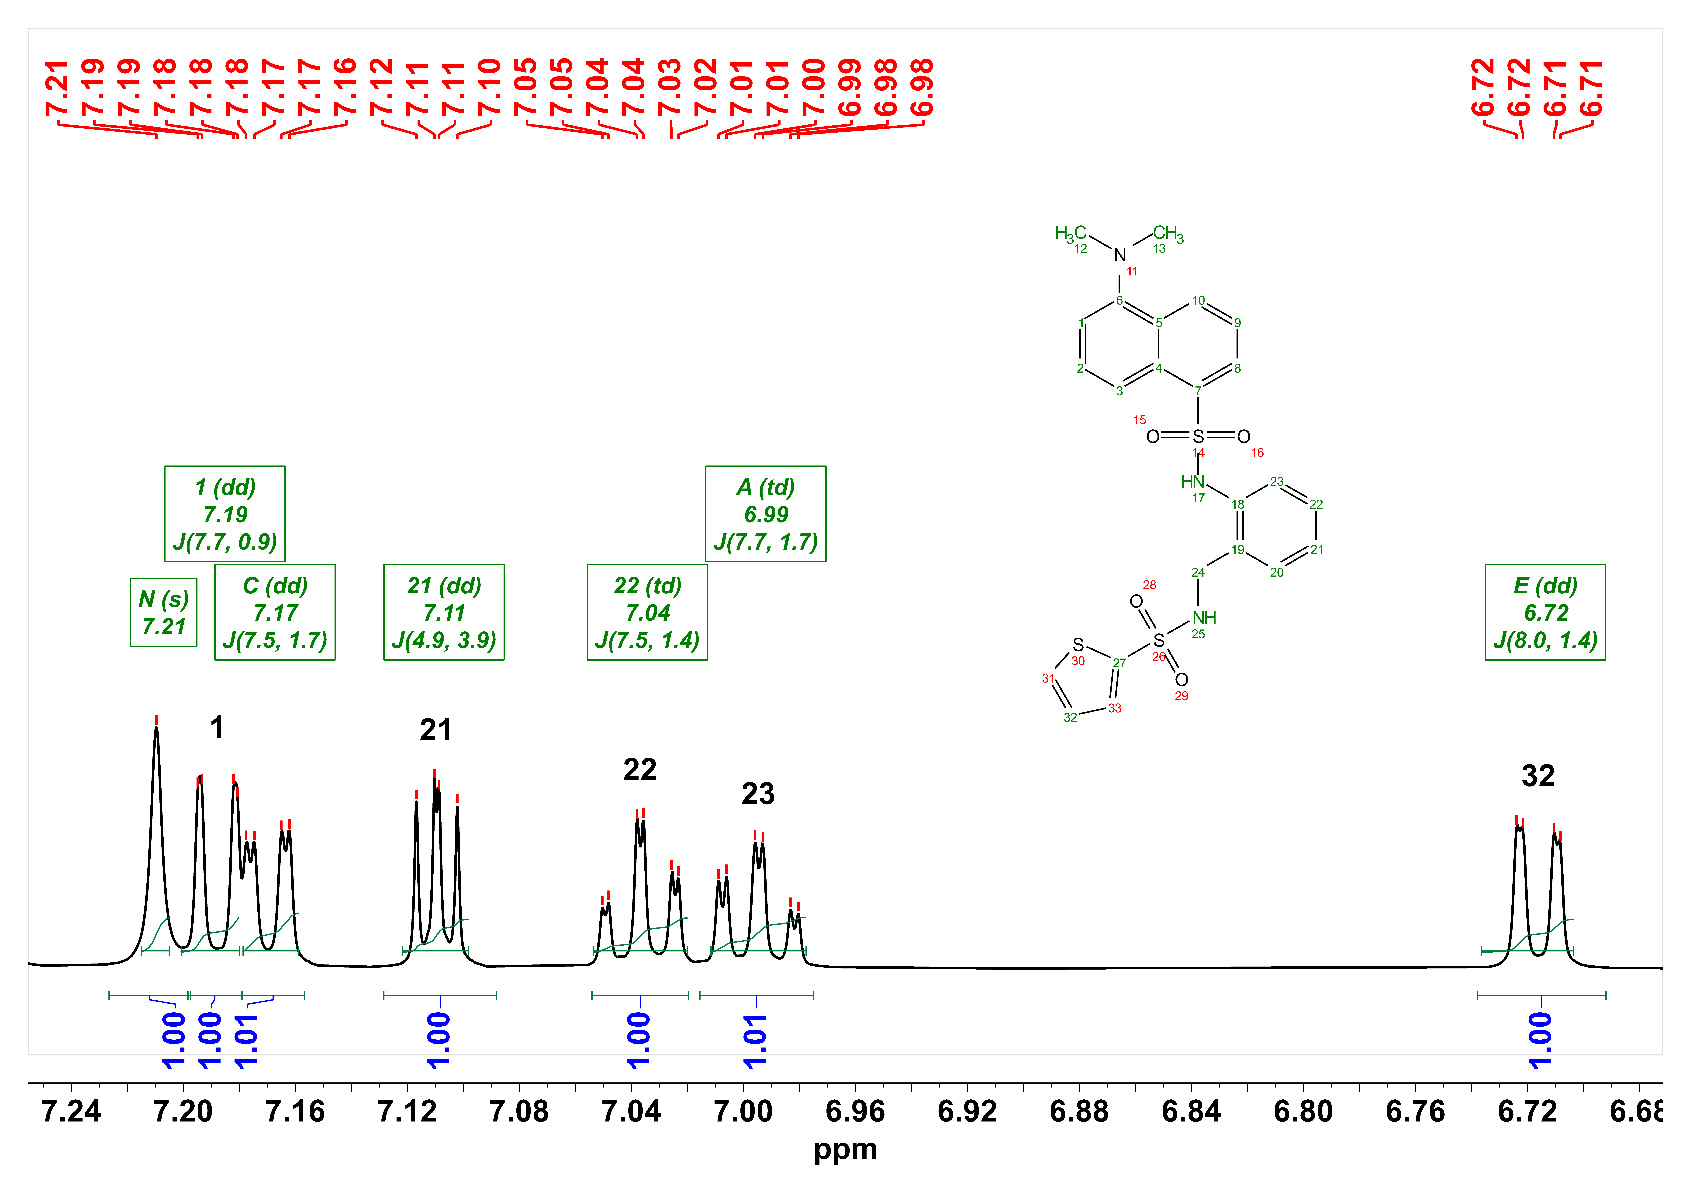


**Figure S4.** 1H NMR spectrum of **L4**.


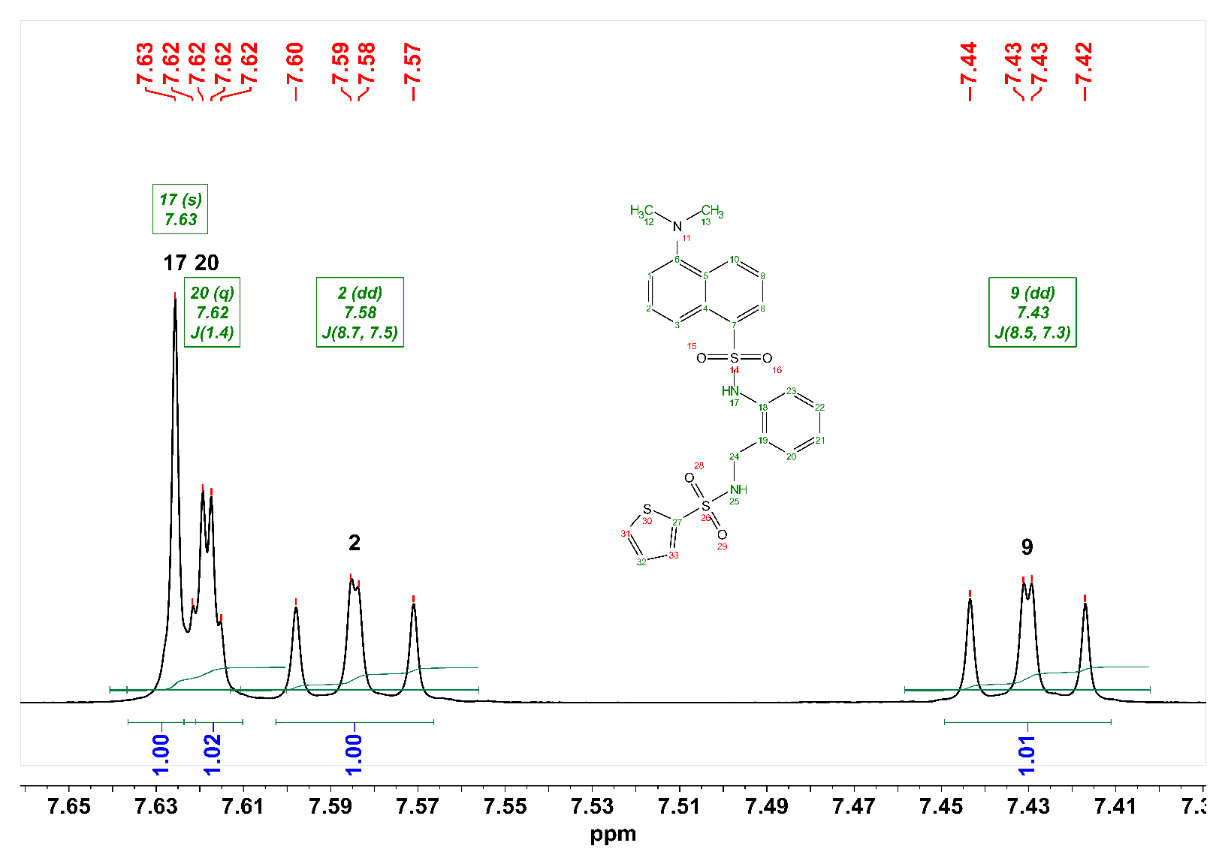


**Figure S4.** 1H NMR spectrum of **L4**.


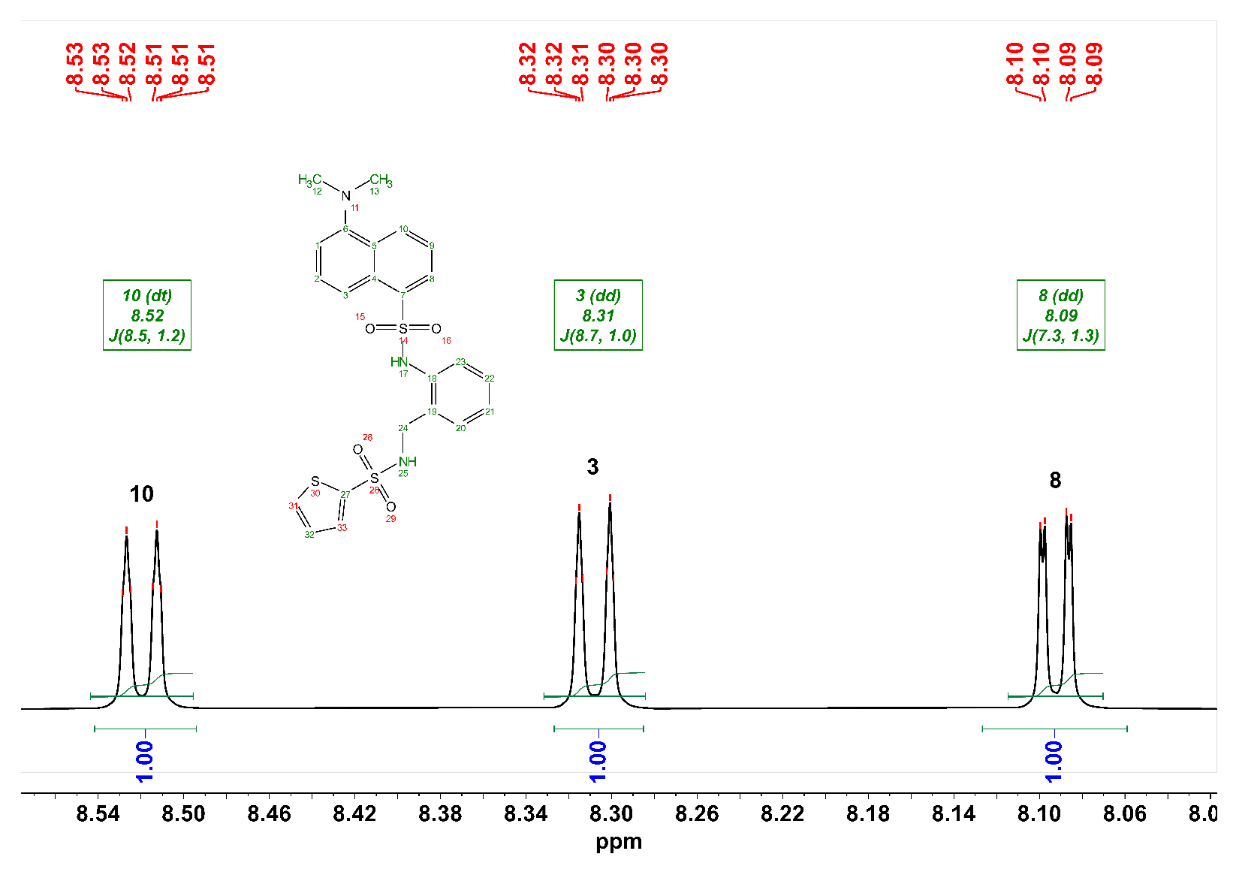


**Figure S4.** 1H NMR spectrum of **L4**.


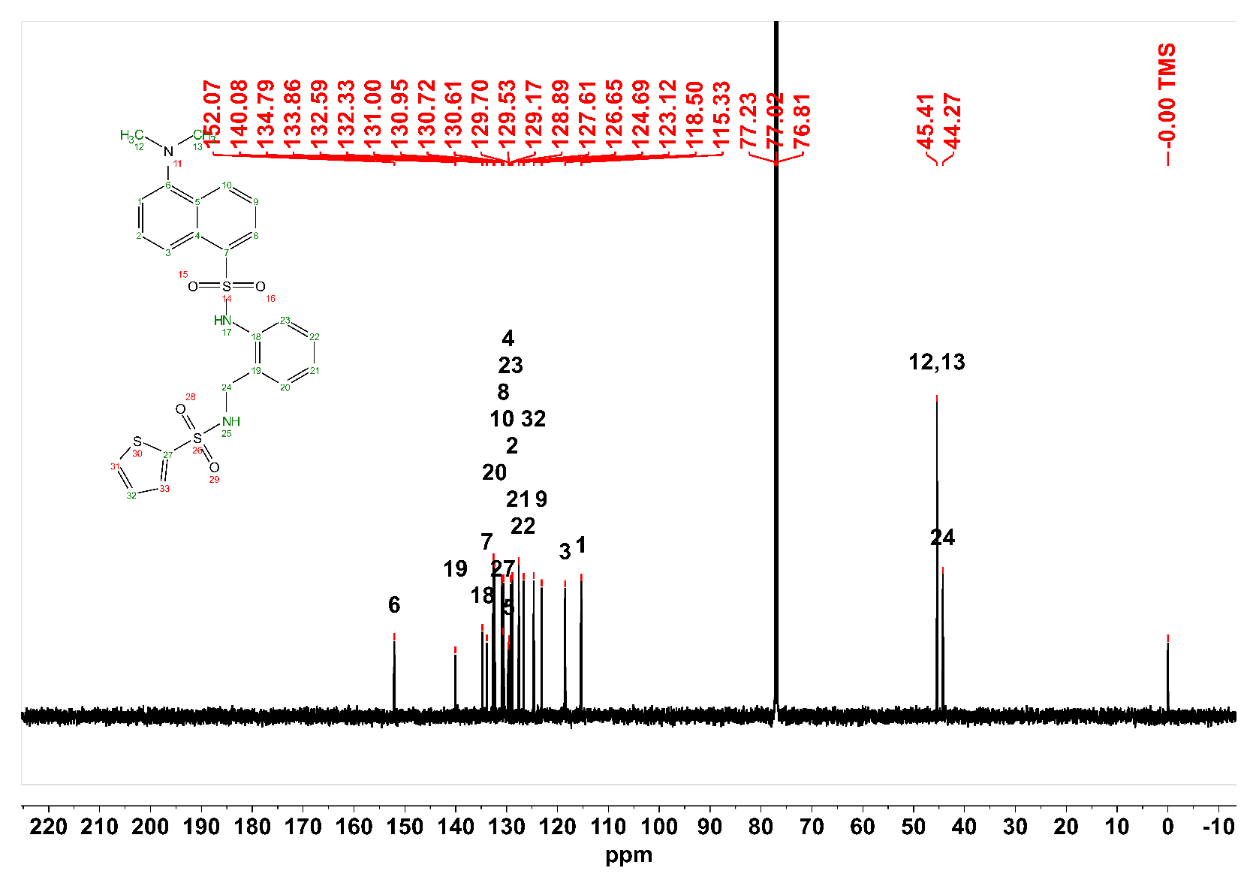


**Figure S4.** 13C NMR spectrum of **L4**.


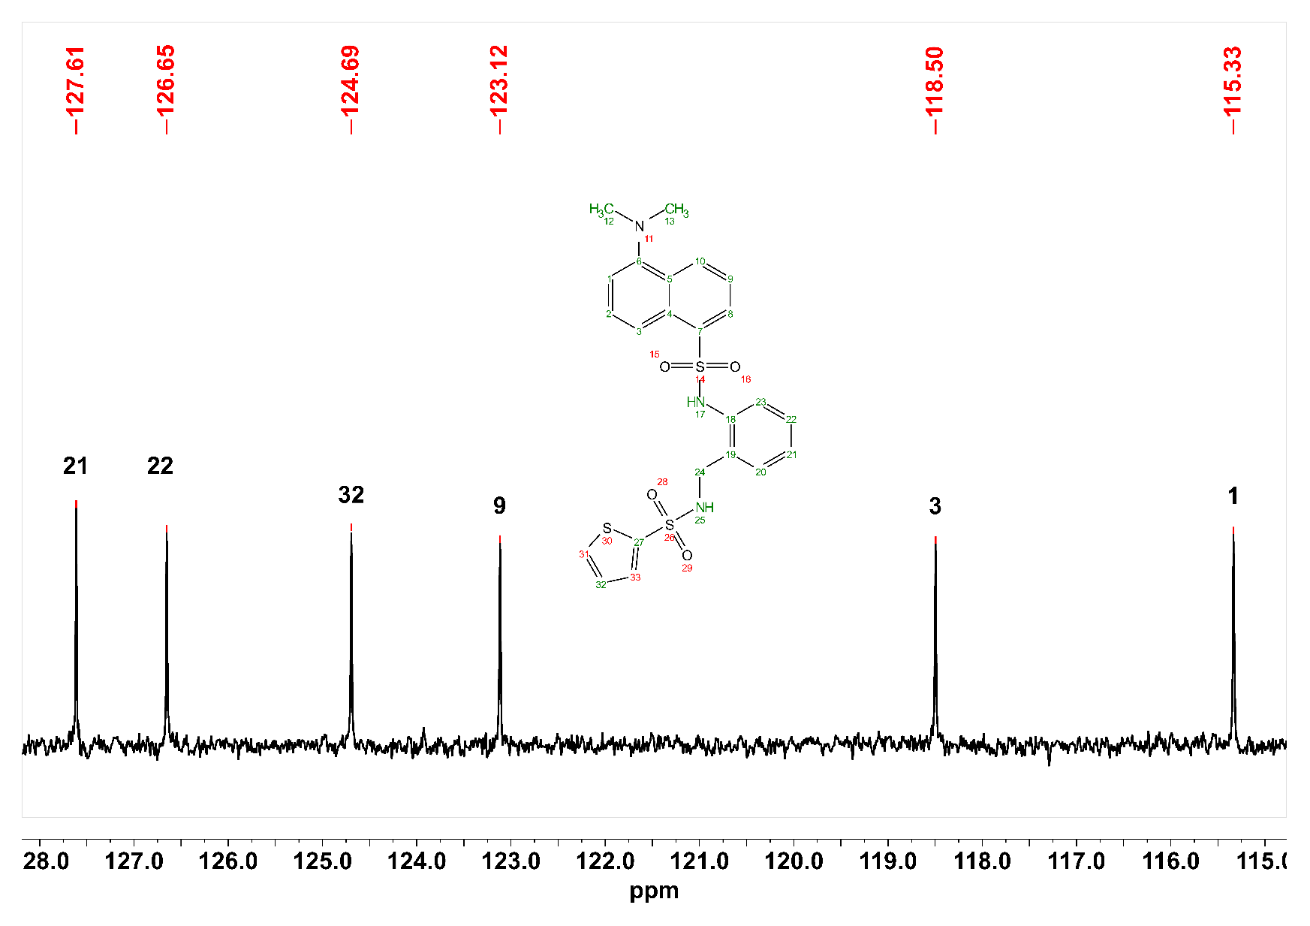


**Figure S4.** 13C NMR spectrum of **L4**.


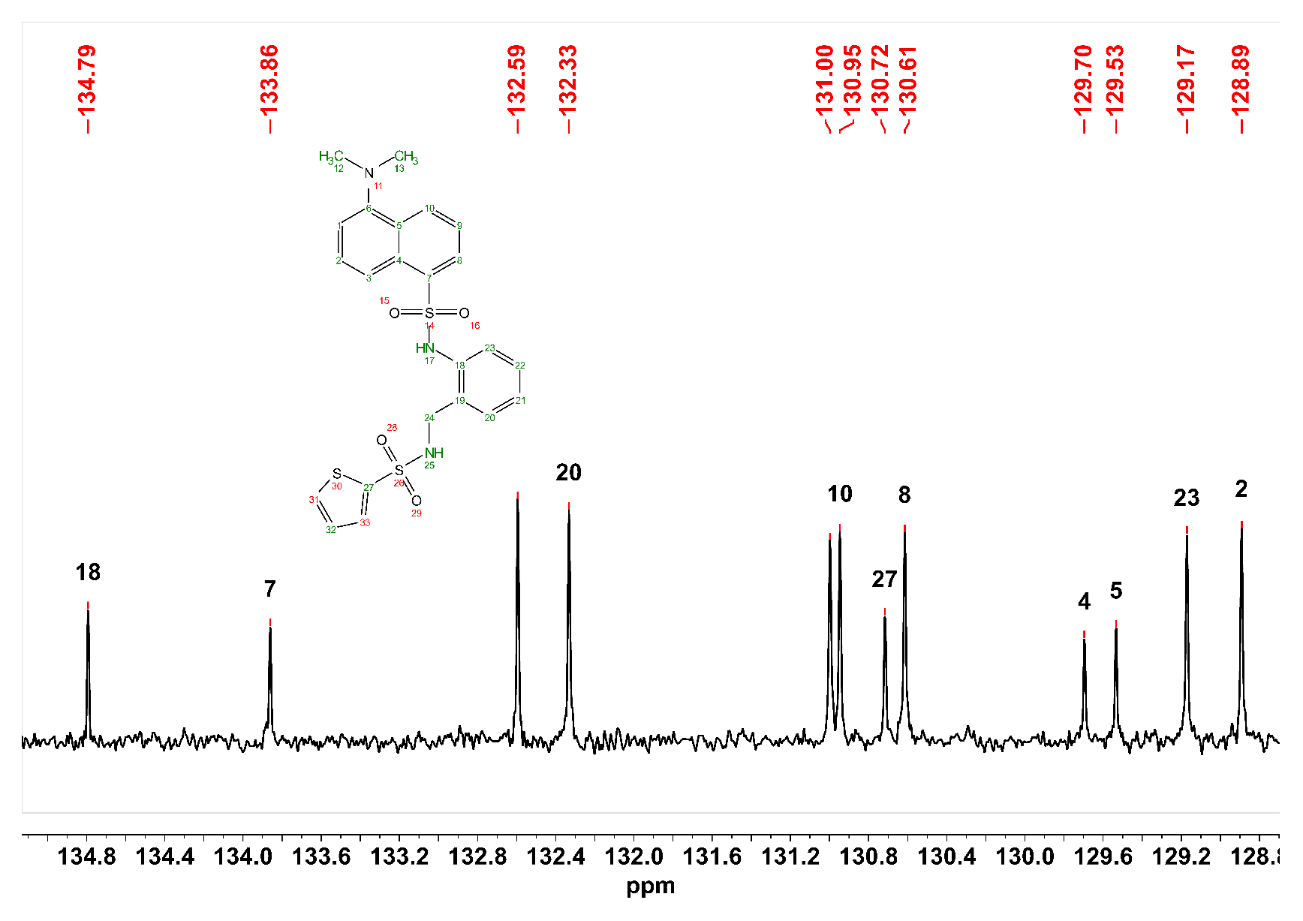


**Figure S4.** 13C NMR spectrum of **L4**.


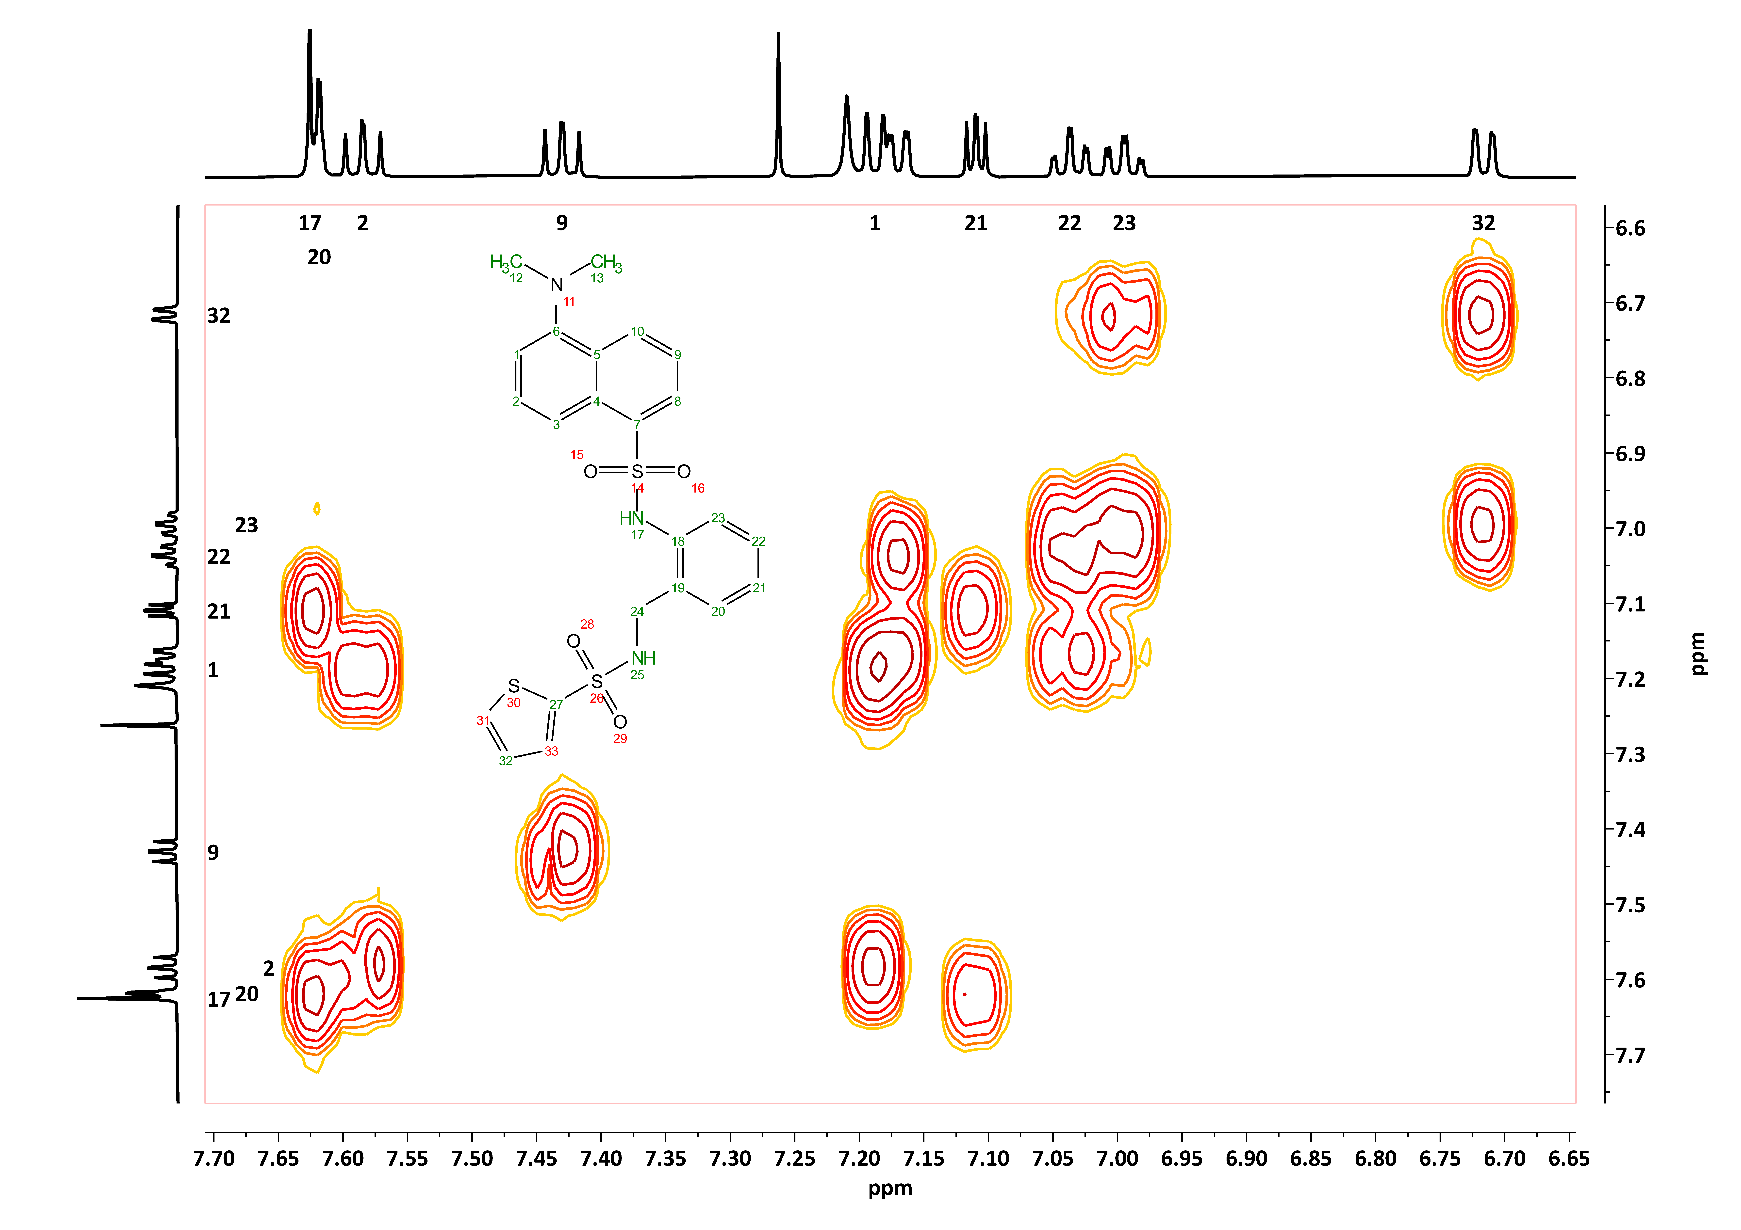


**Figure S4.** COSY NMR spectrum of **L4**.


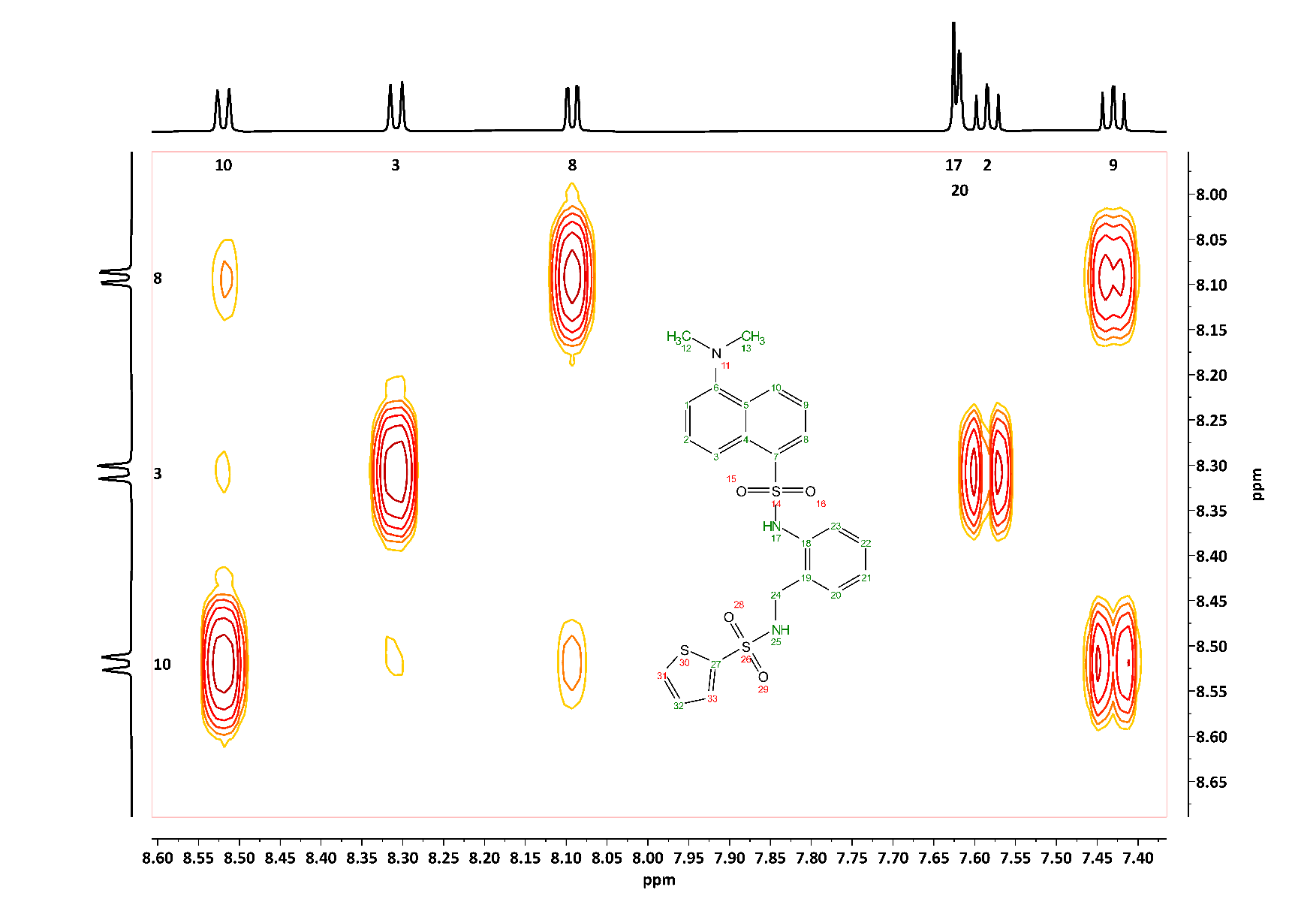


**Figure S4.** COSY NMR spectrum of **L4**.


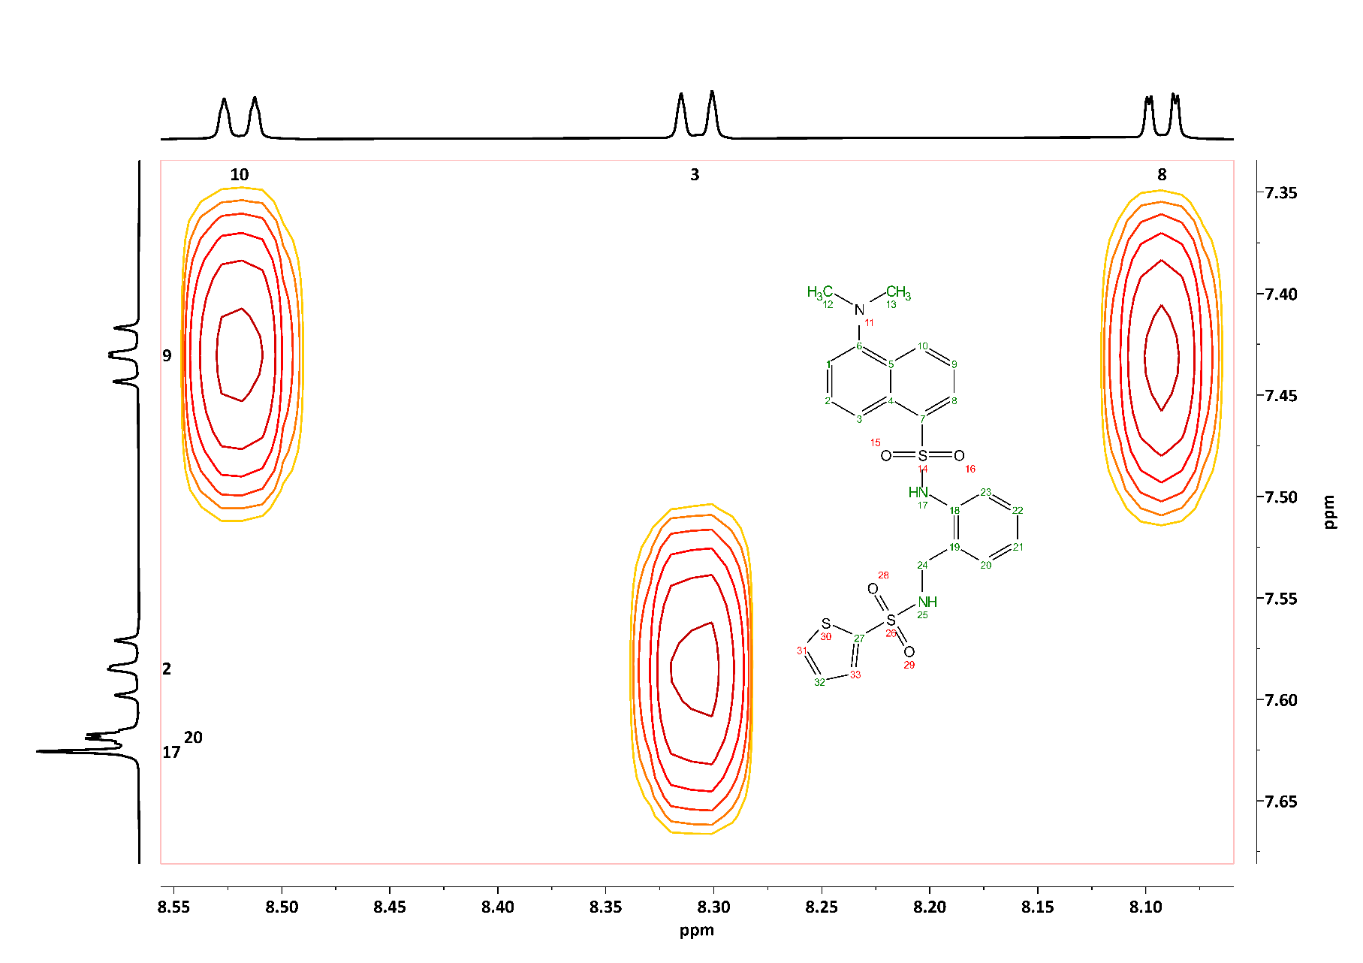


**Figure S4.** COSY NMR spectrum of **L4**.


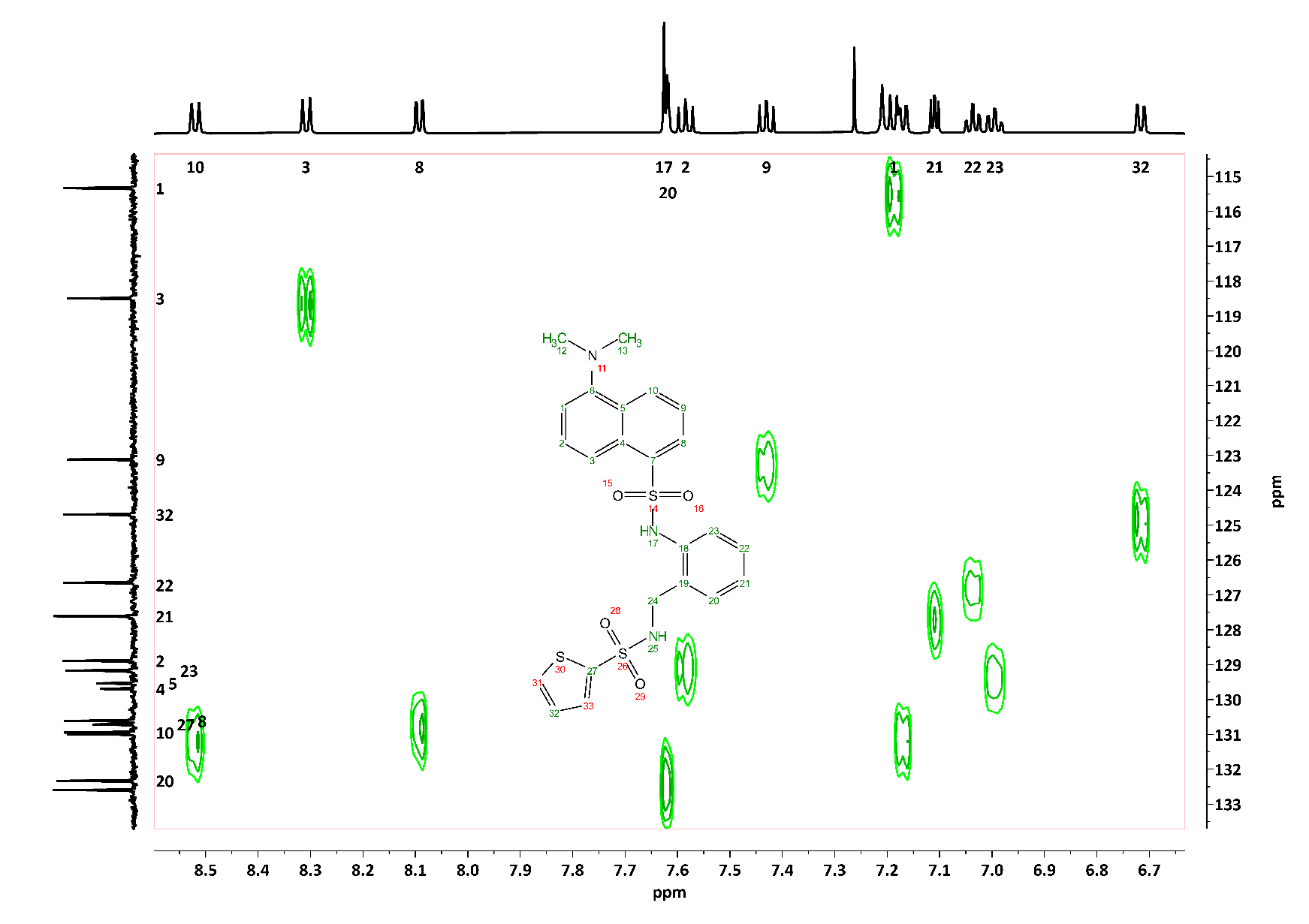


**Figure S4.** HSQC NMR spectrum of **L4**.


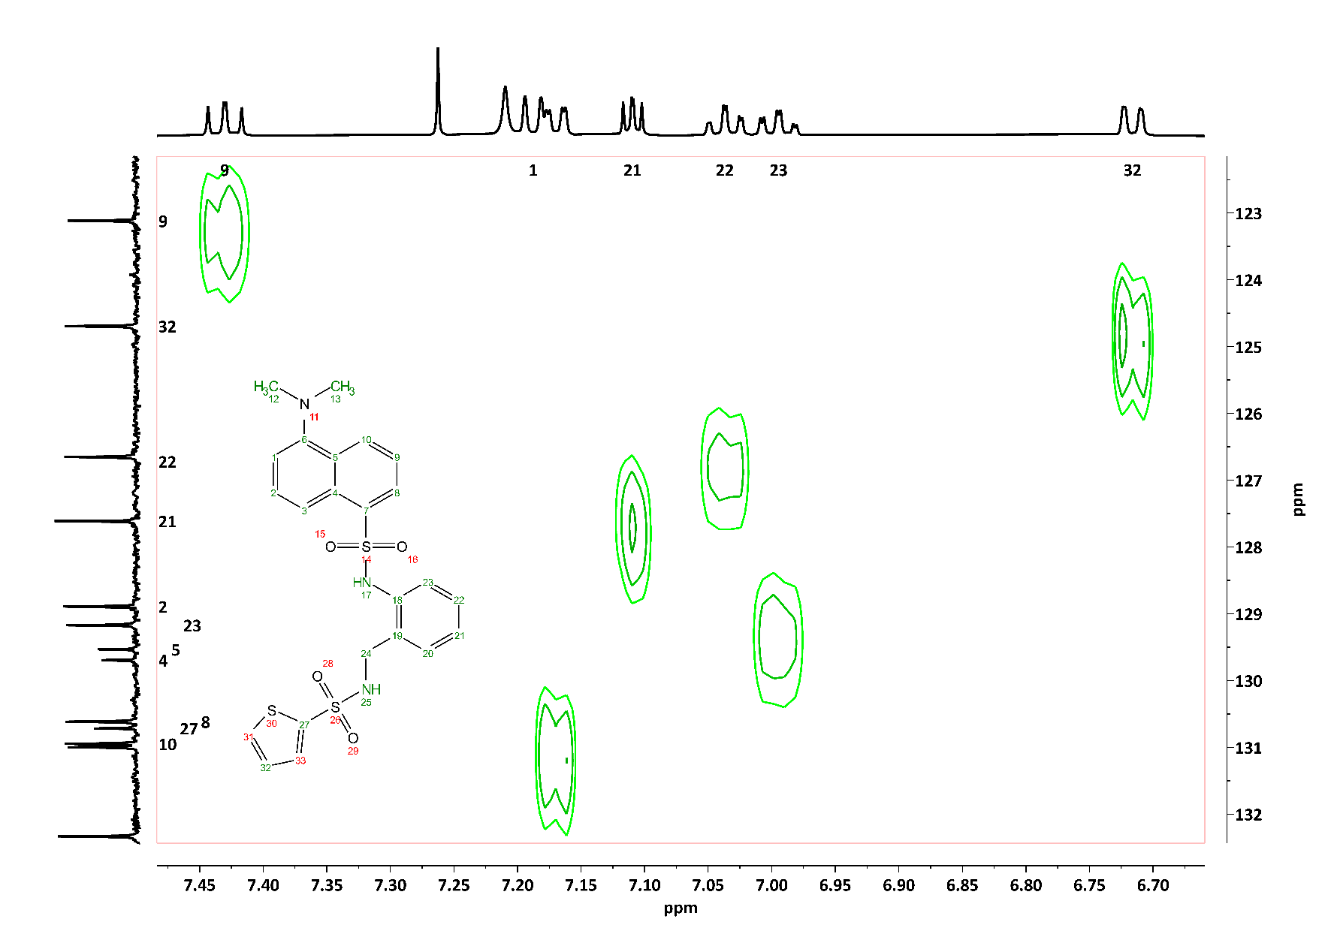


**Figure S4.** COSY NMR spectrum of **L4**.


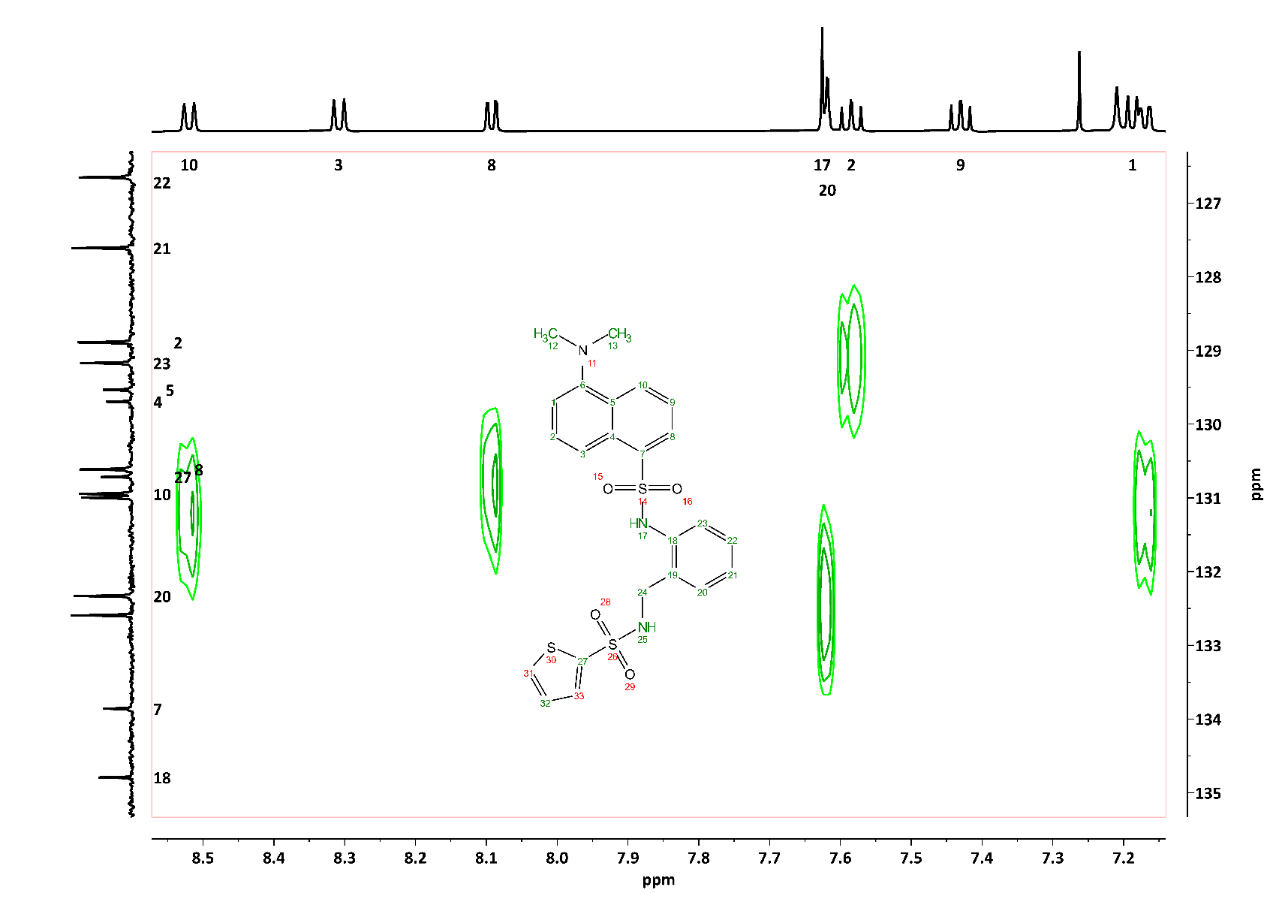


**Figure S4.** COSY NMR spectrum of **L4**.


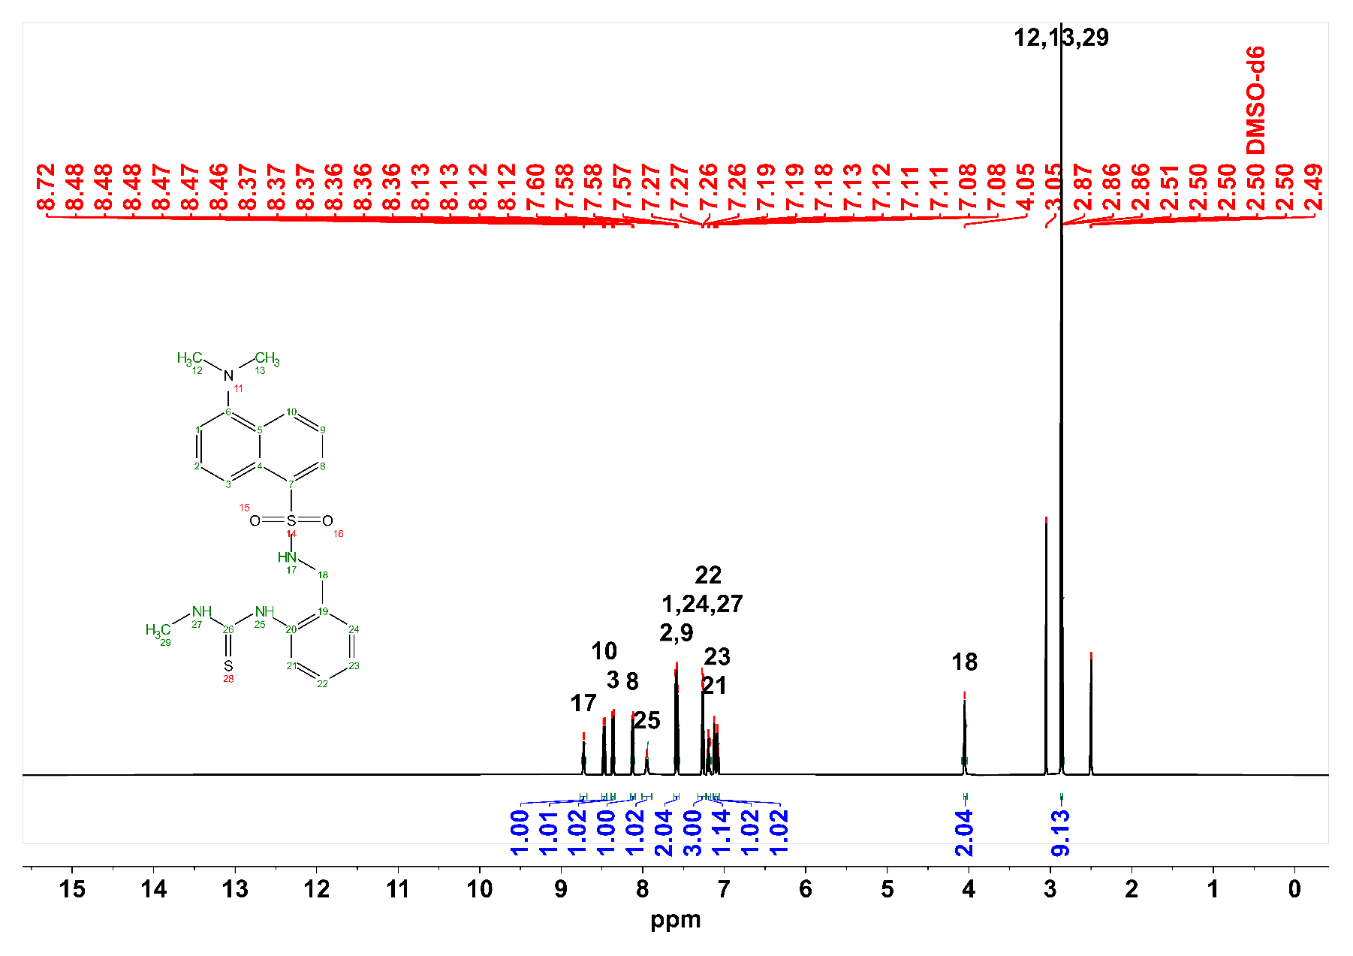


**Figure S5.** 1H NMR spectrum of **L5**.


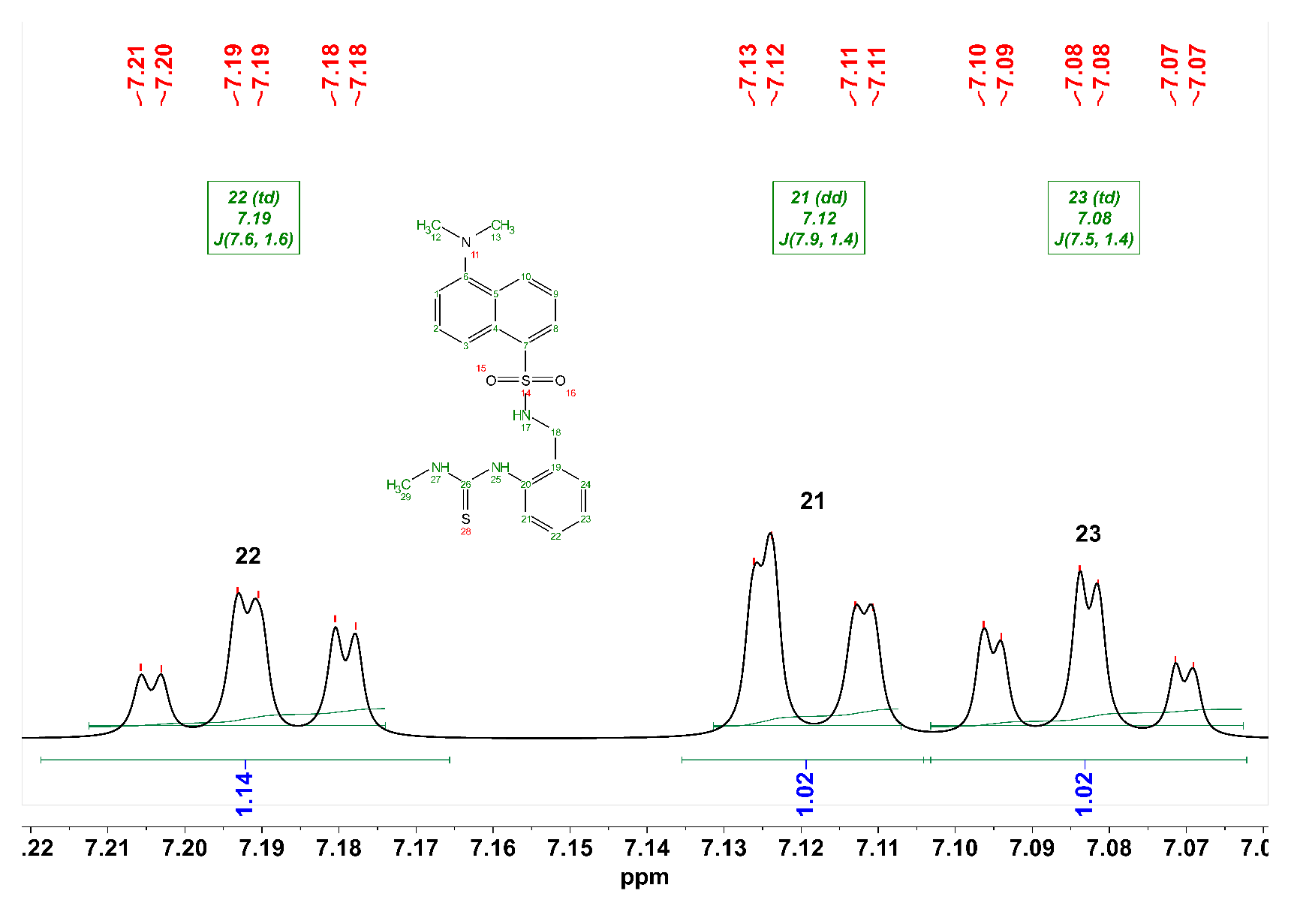


**Figure S5.** 1H NMR spectrum of **L5**.


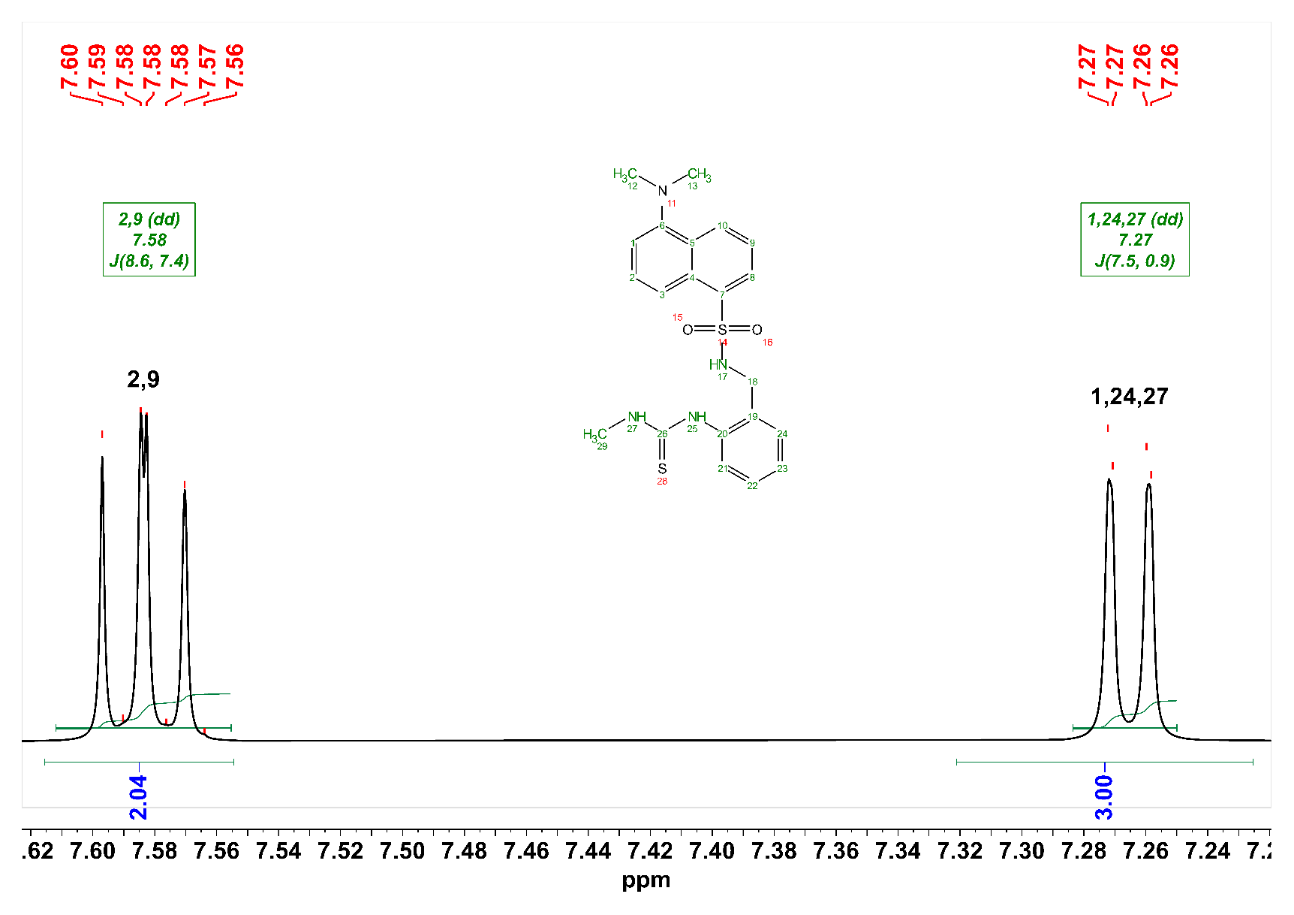


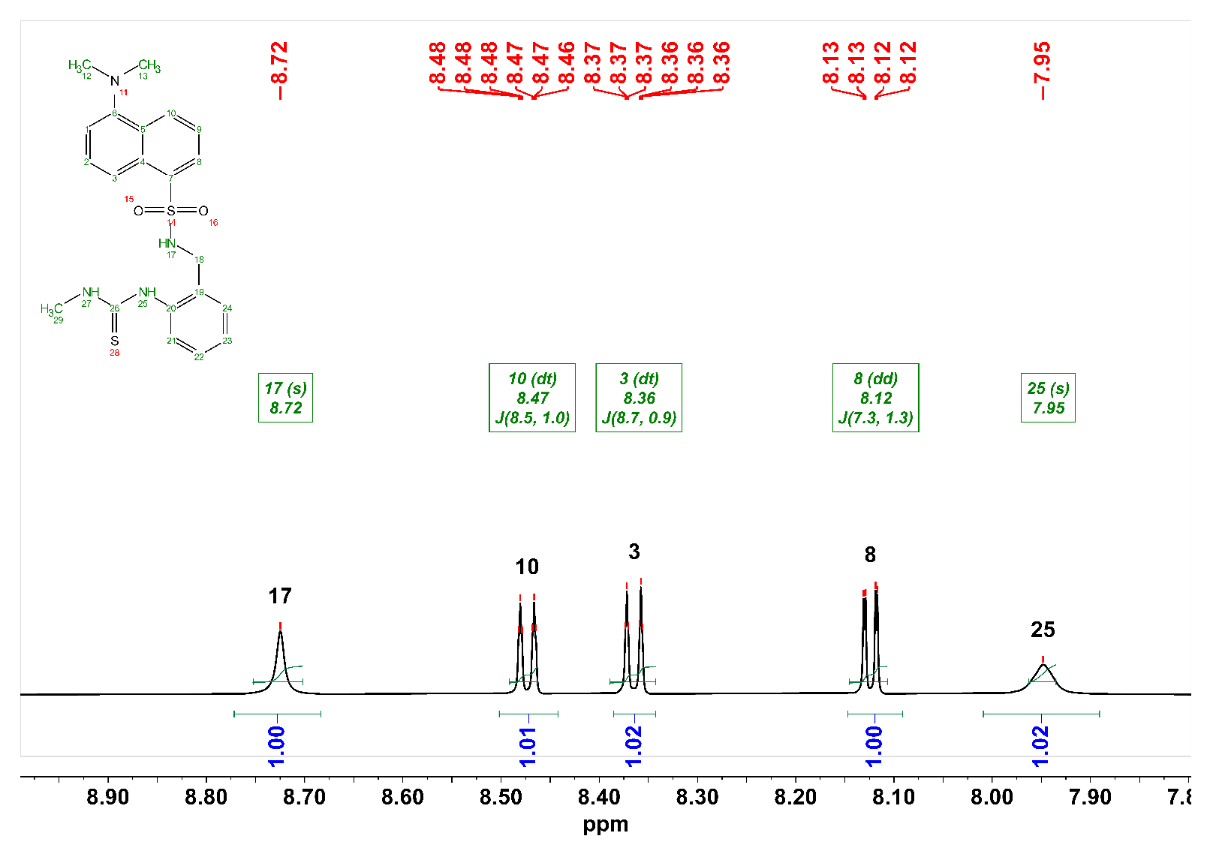


**Figure S5.** 1H NMR spectrum of **L5**.

**Figure S5-4.** 1H NMR spectrum of **L5**.


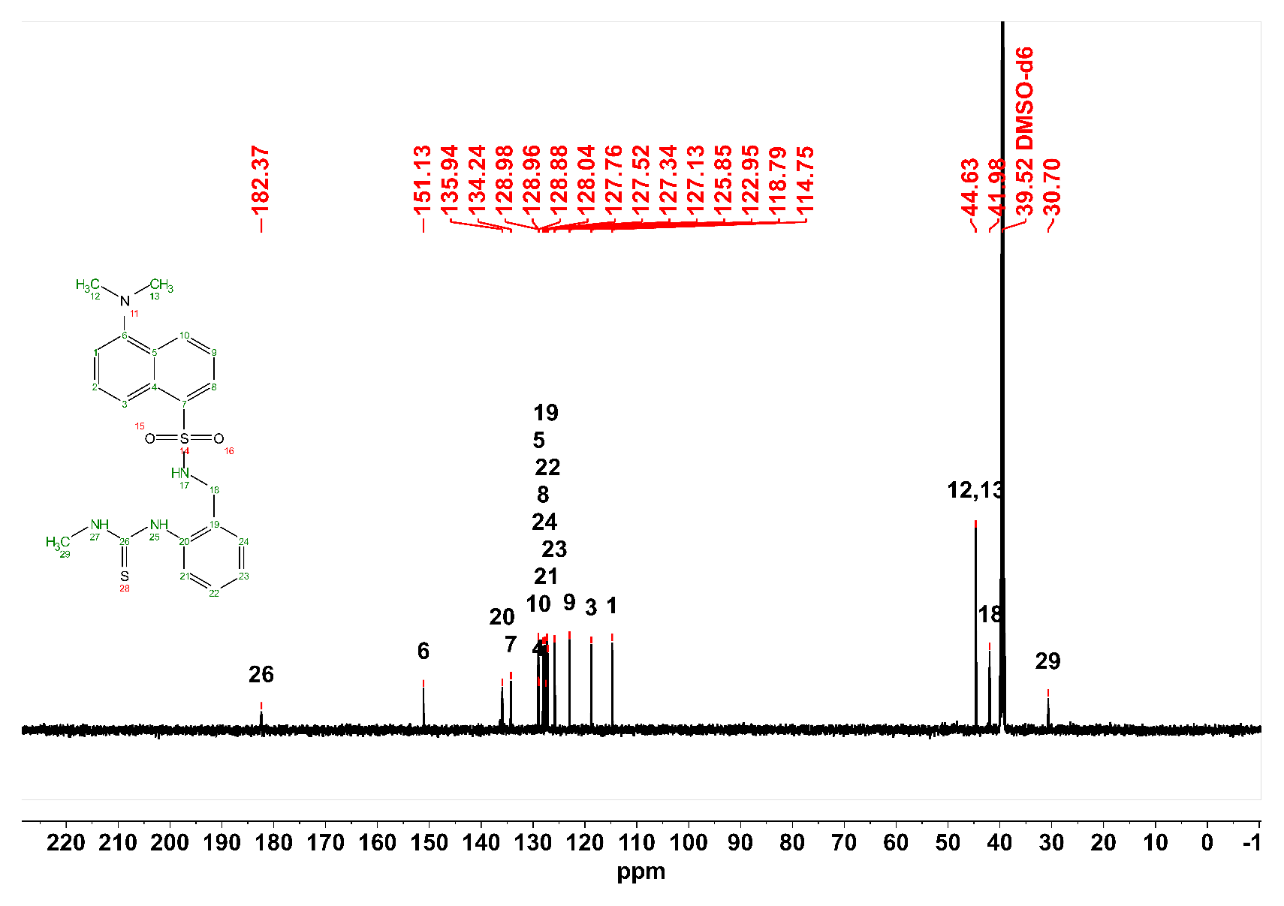


**Figure S5.** 13C NMR spectrum of **L5**.


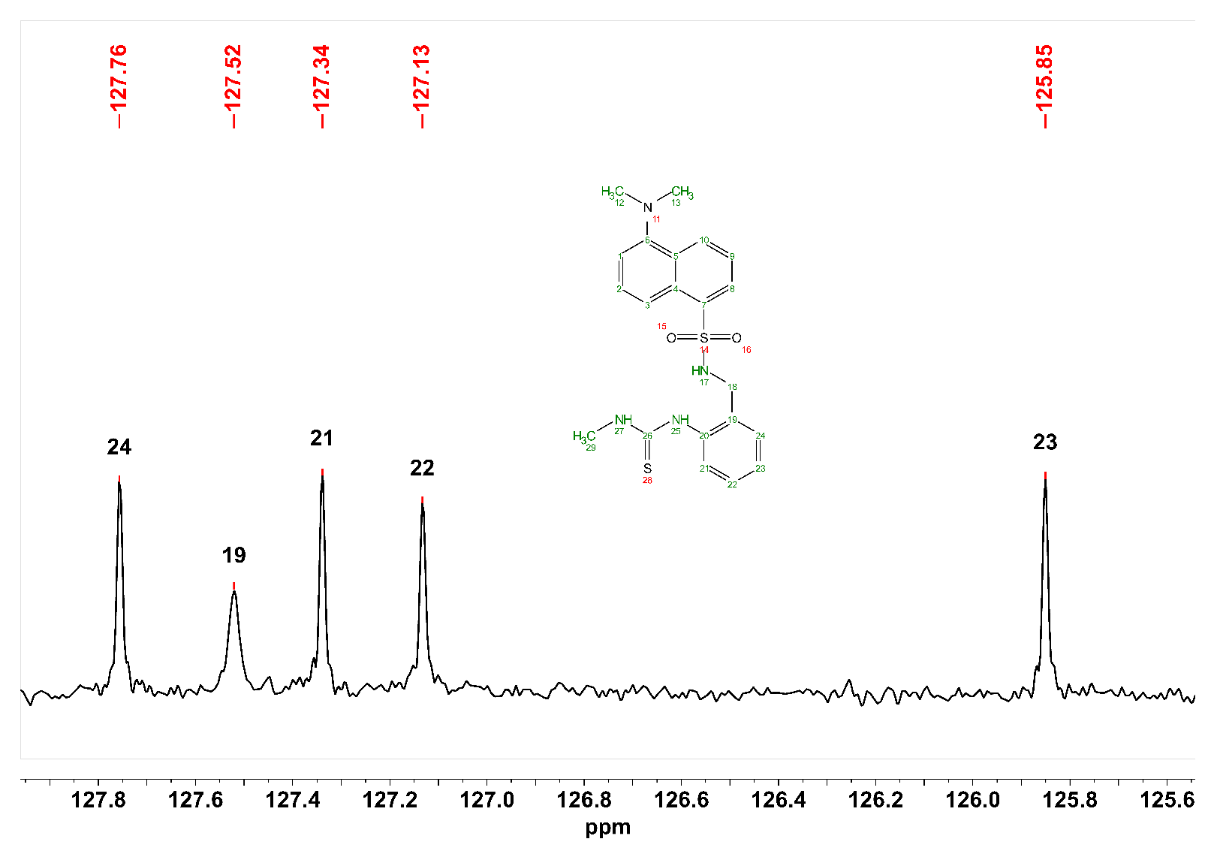


**Figure S5.** 13C NMR spectrum of **L5**.


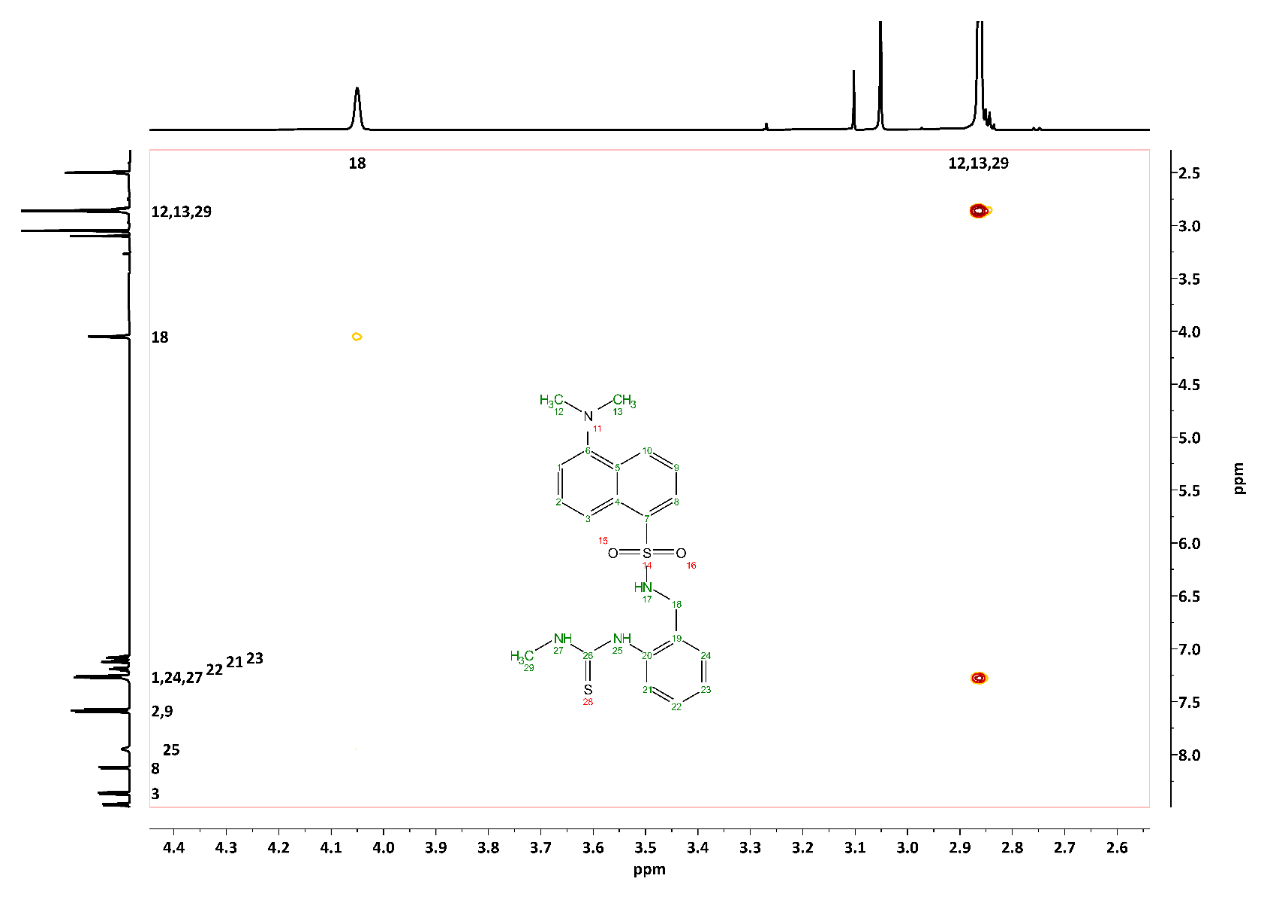


**Figure S5.** COSY NMR spectrum of **L5**.


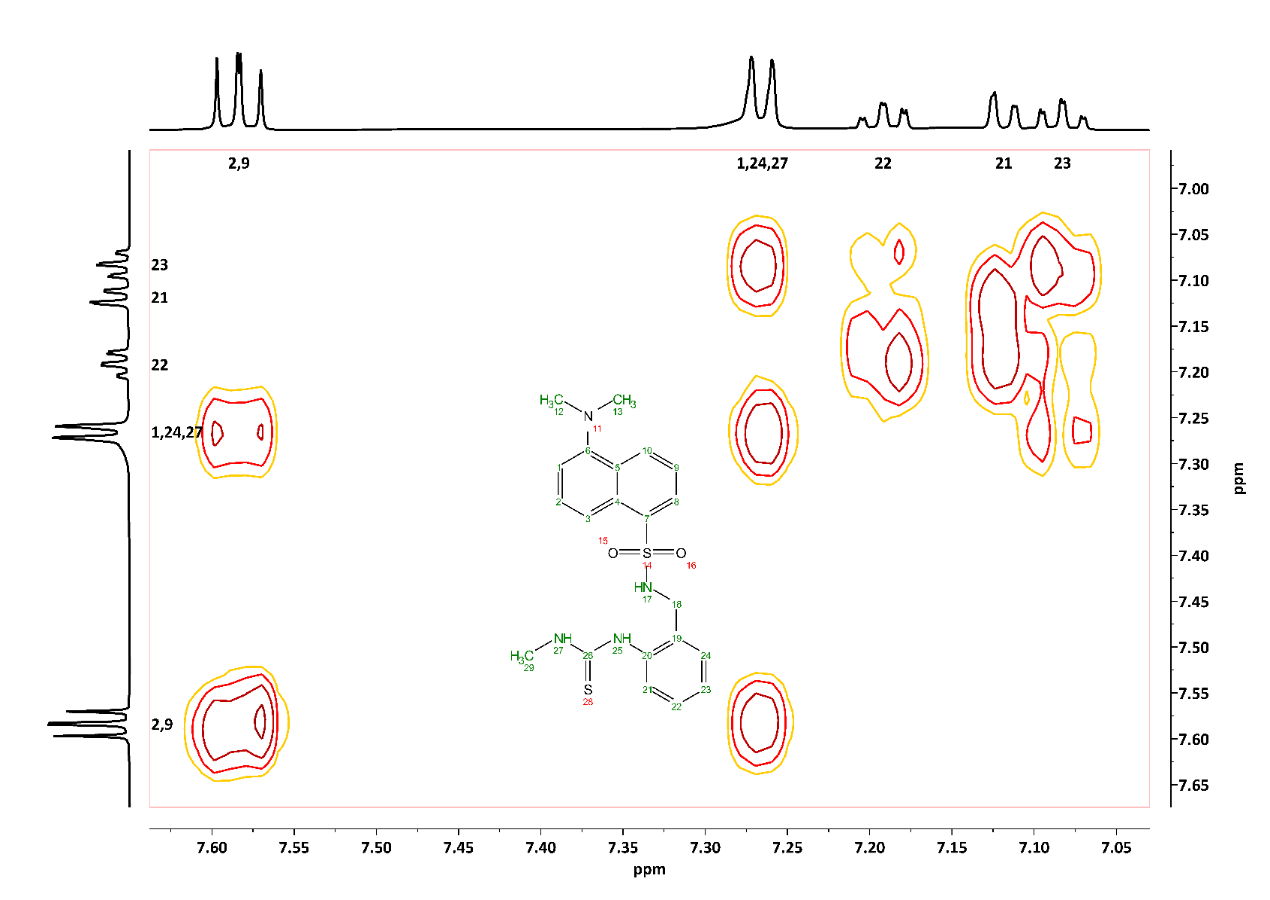


**Figure S5.** COSY NMR spectrum of **L5**.


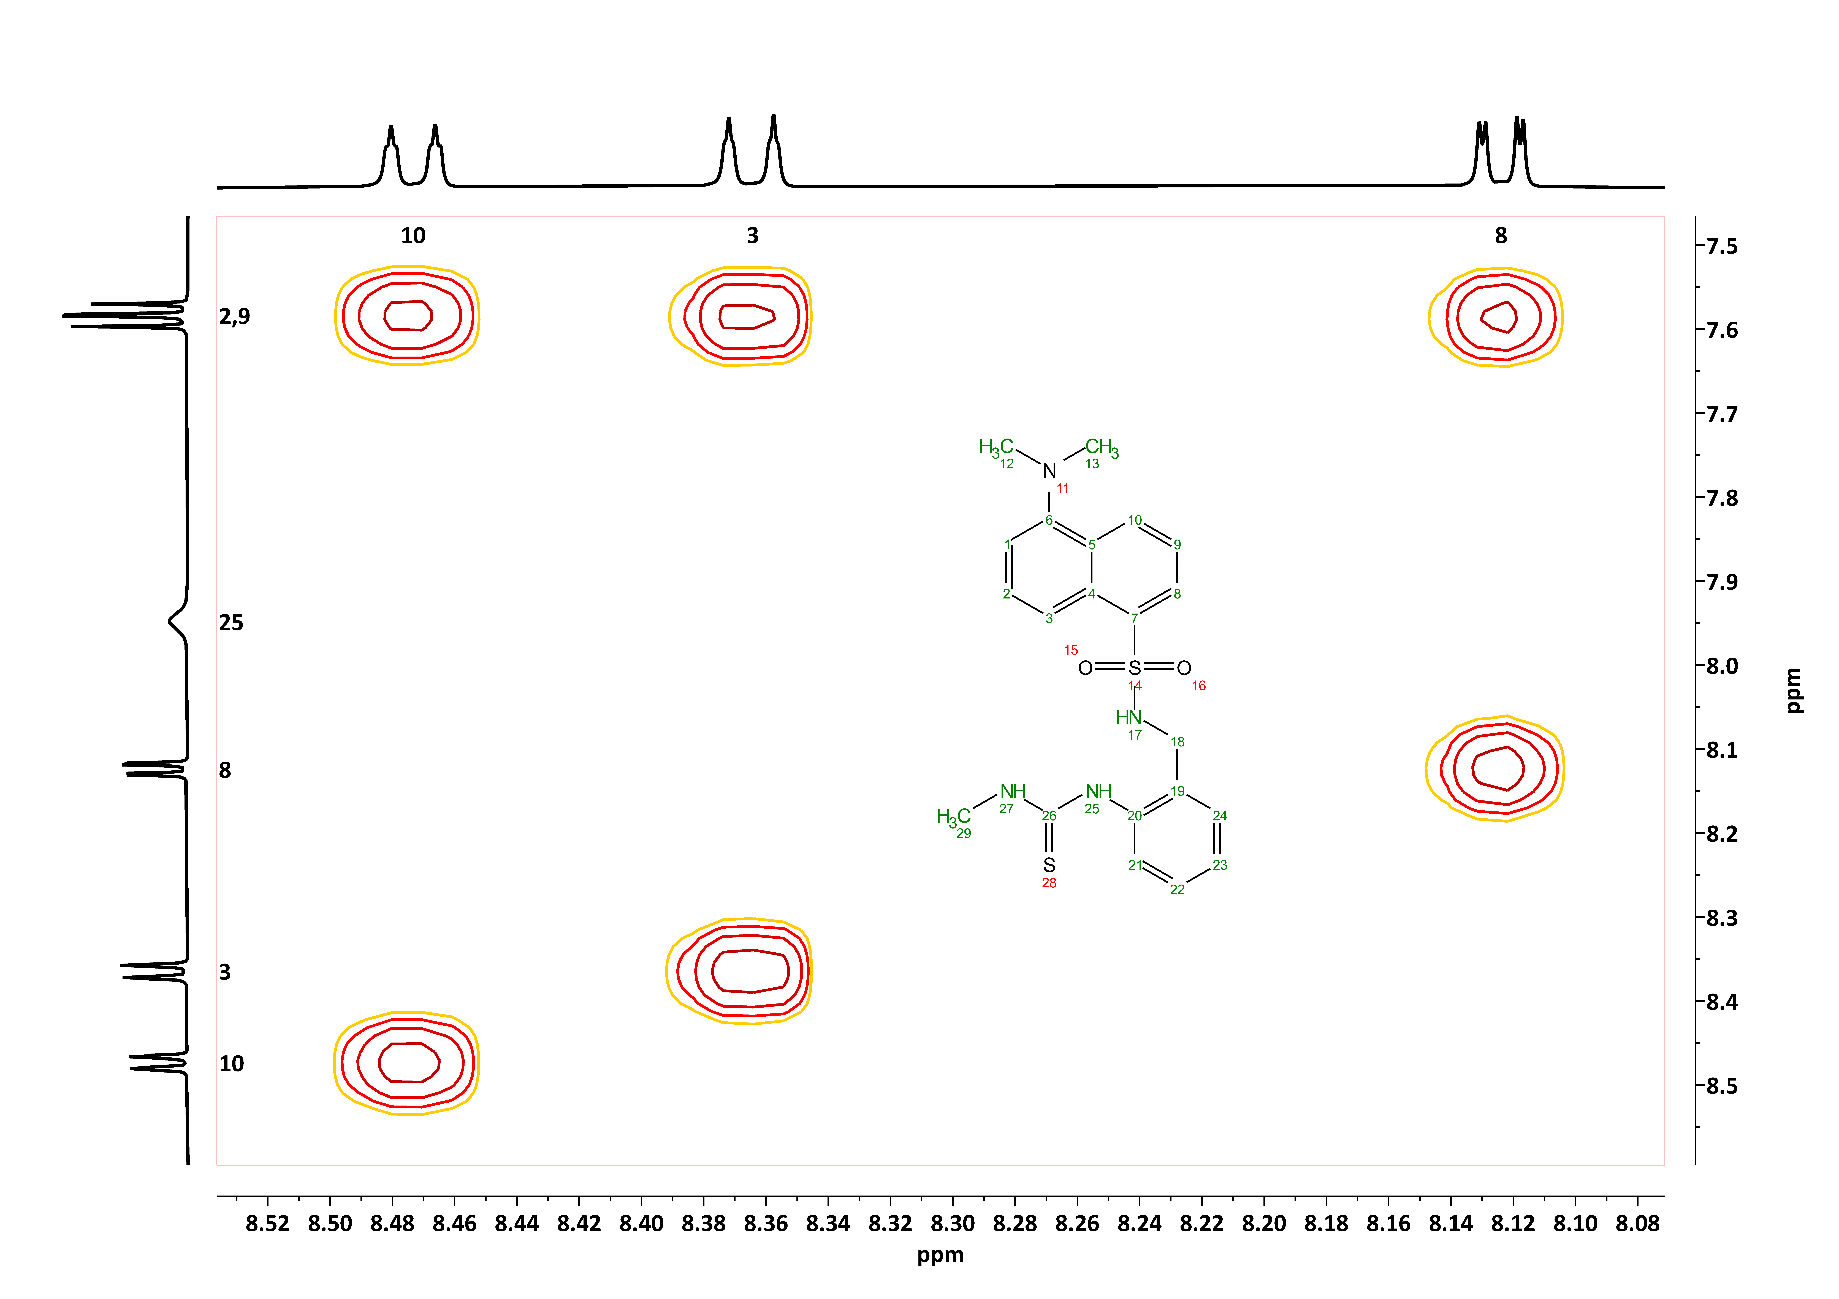


**Figure S5.** COSY NMR spectrum of **L5**.


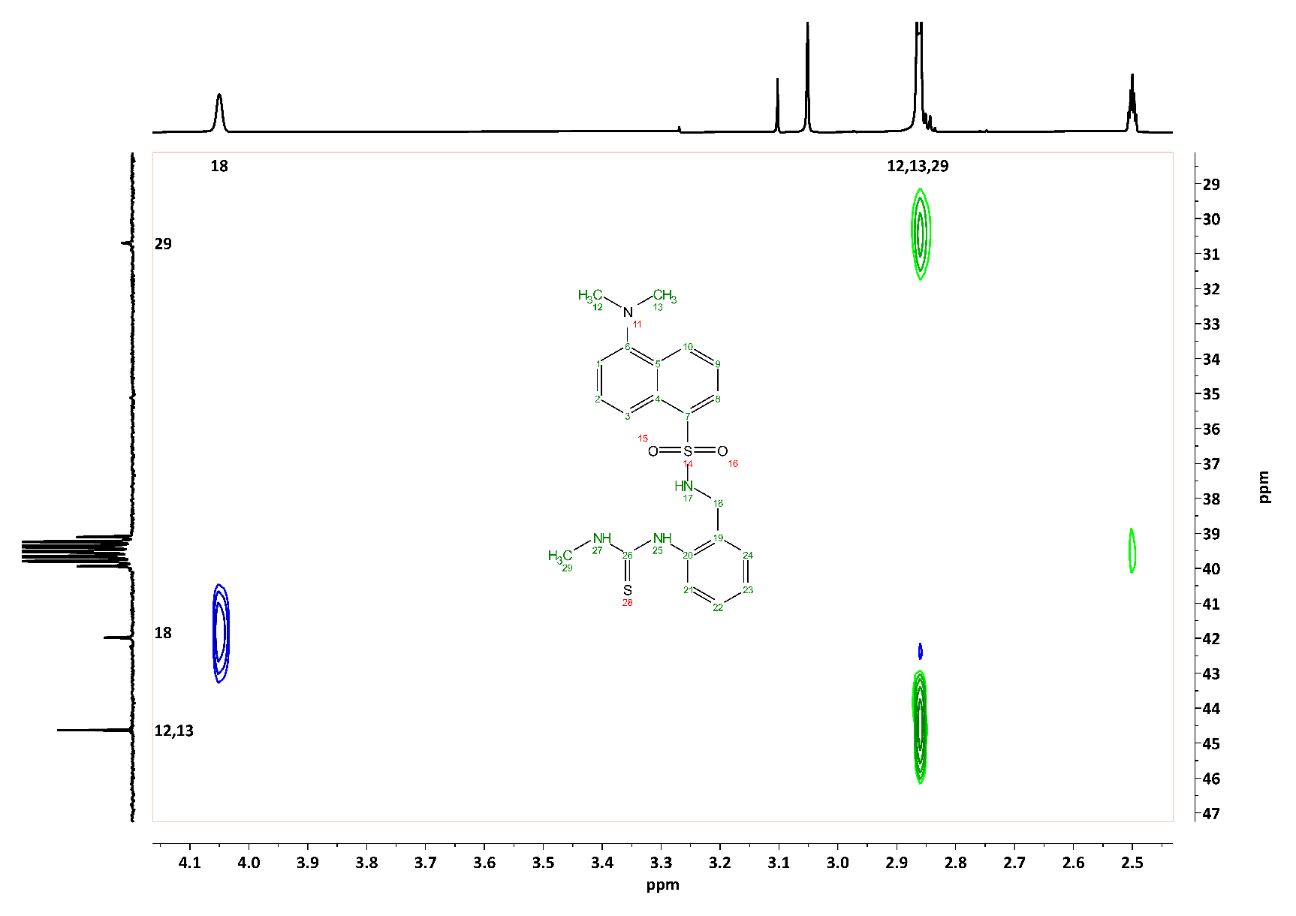


**Figure S5.** HSQC NMR spectrum of **L5**.


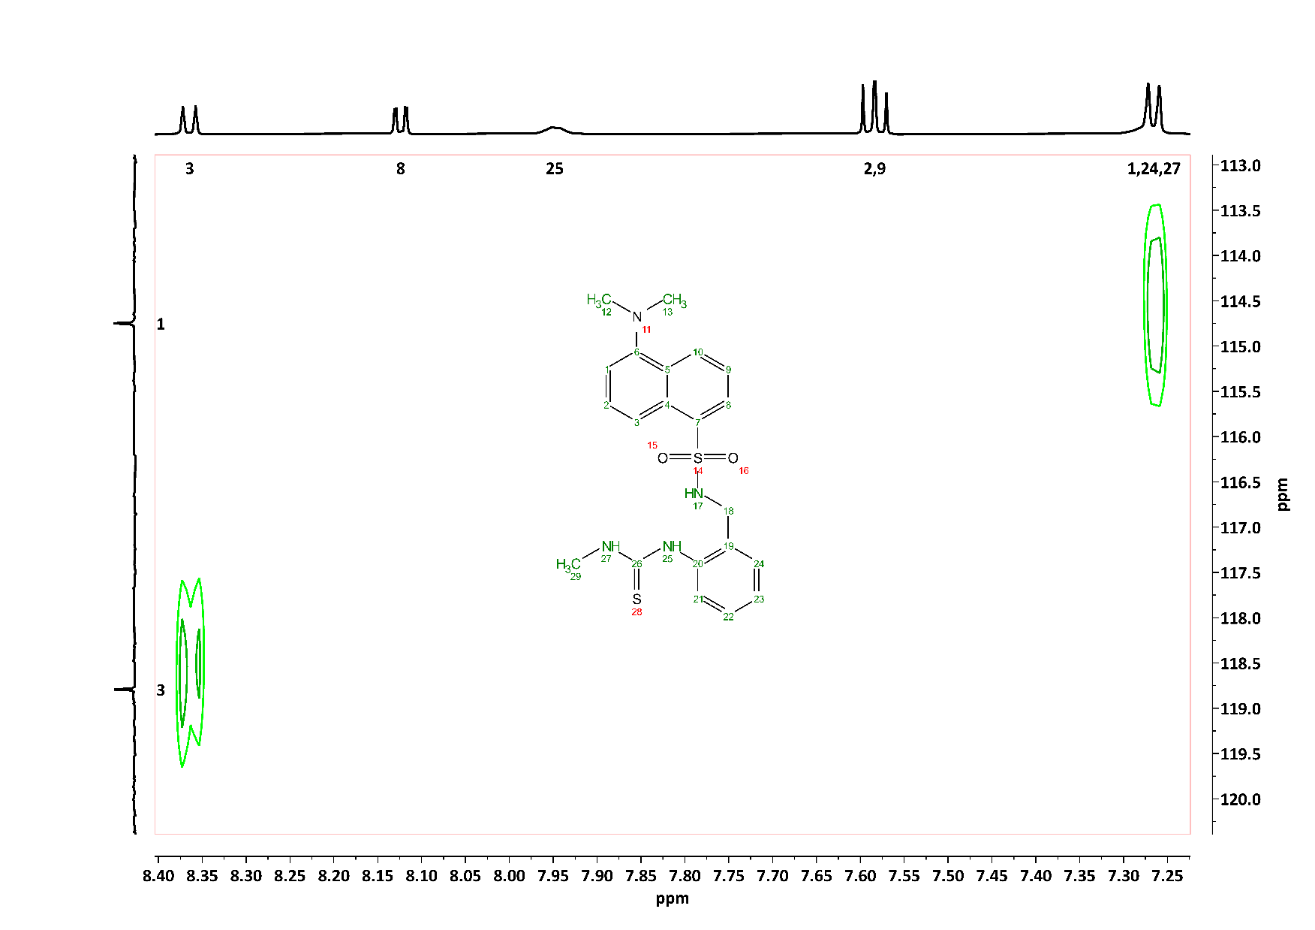


**Figure S5.** HSQC NMR spectrum of **L5**.


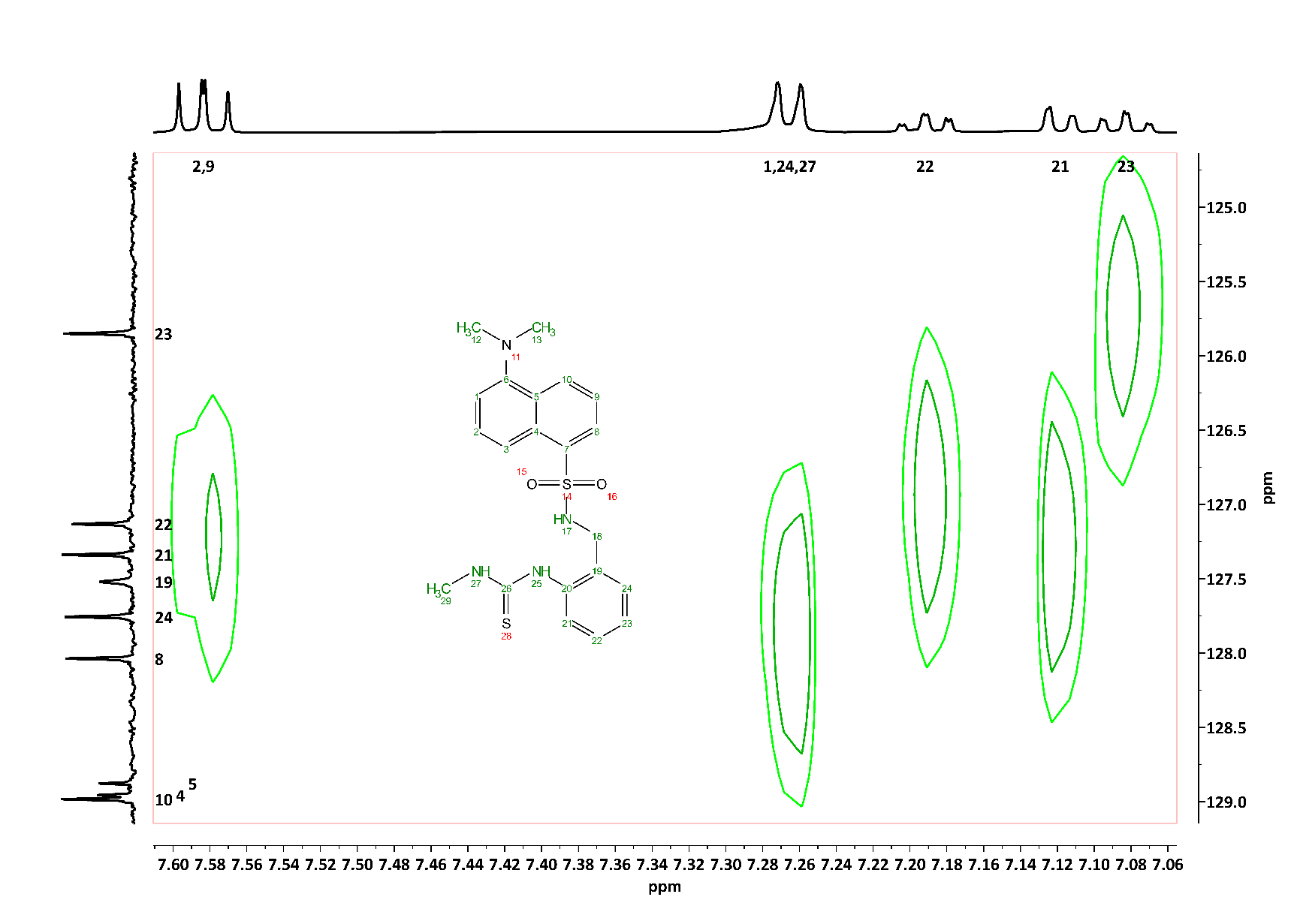


**Figure S5.** HSQC NMR spectrum of **L5**.


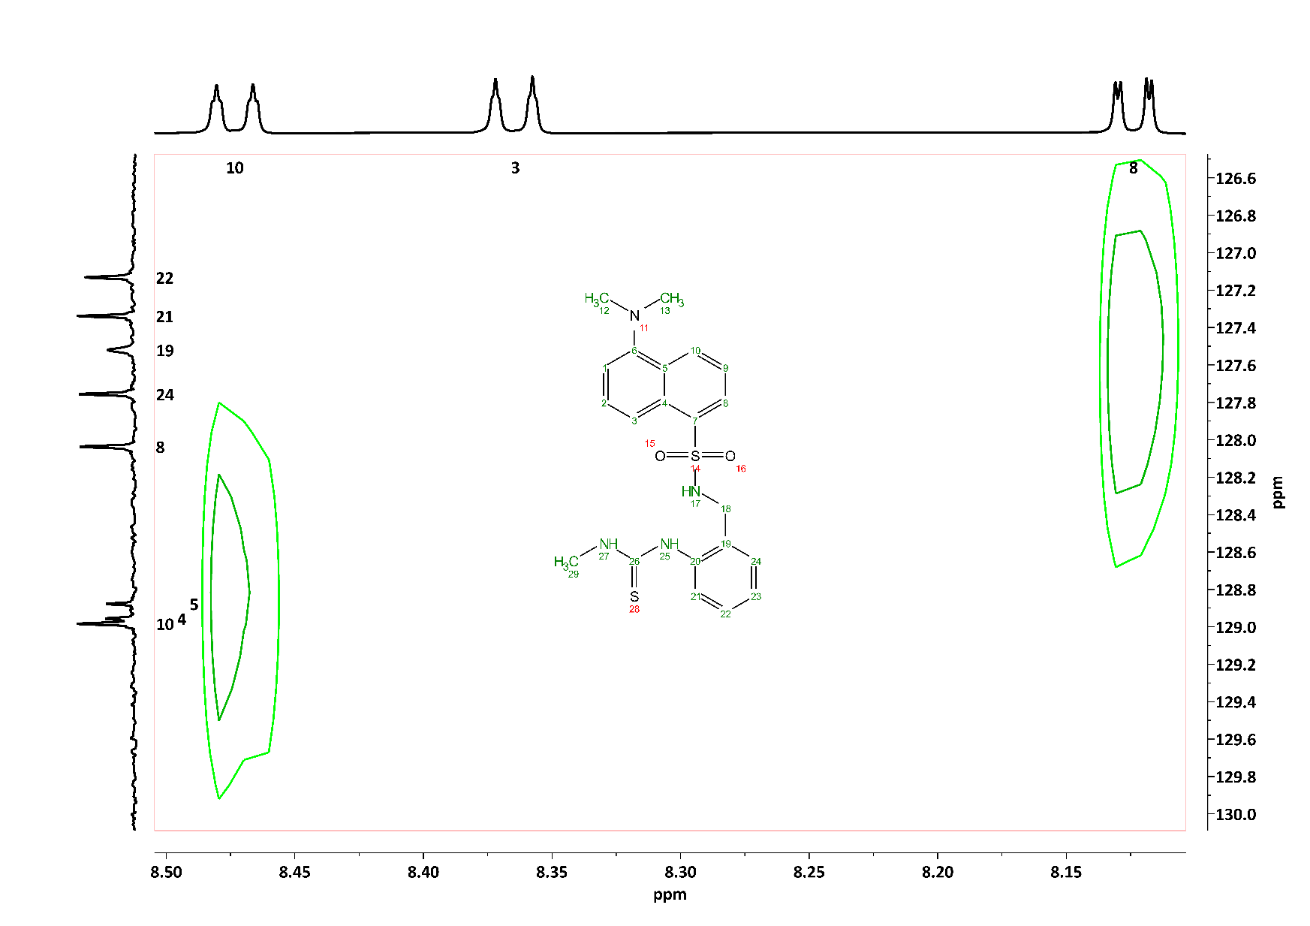


**Figure S5.** HSQC NMR spectrum of **L5**.


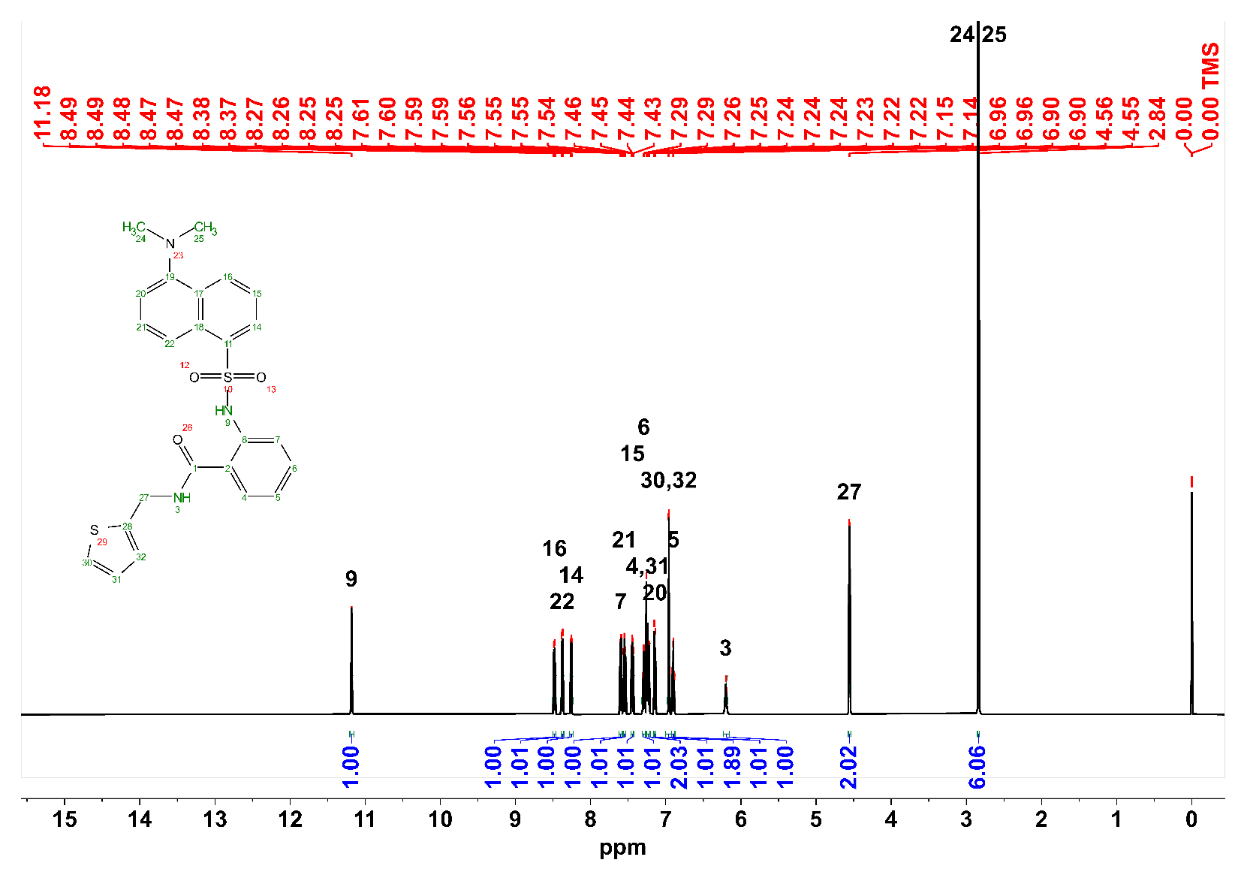


**Figure S6.** 1H NMR spectrum of **L6**.


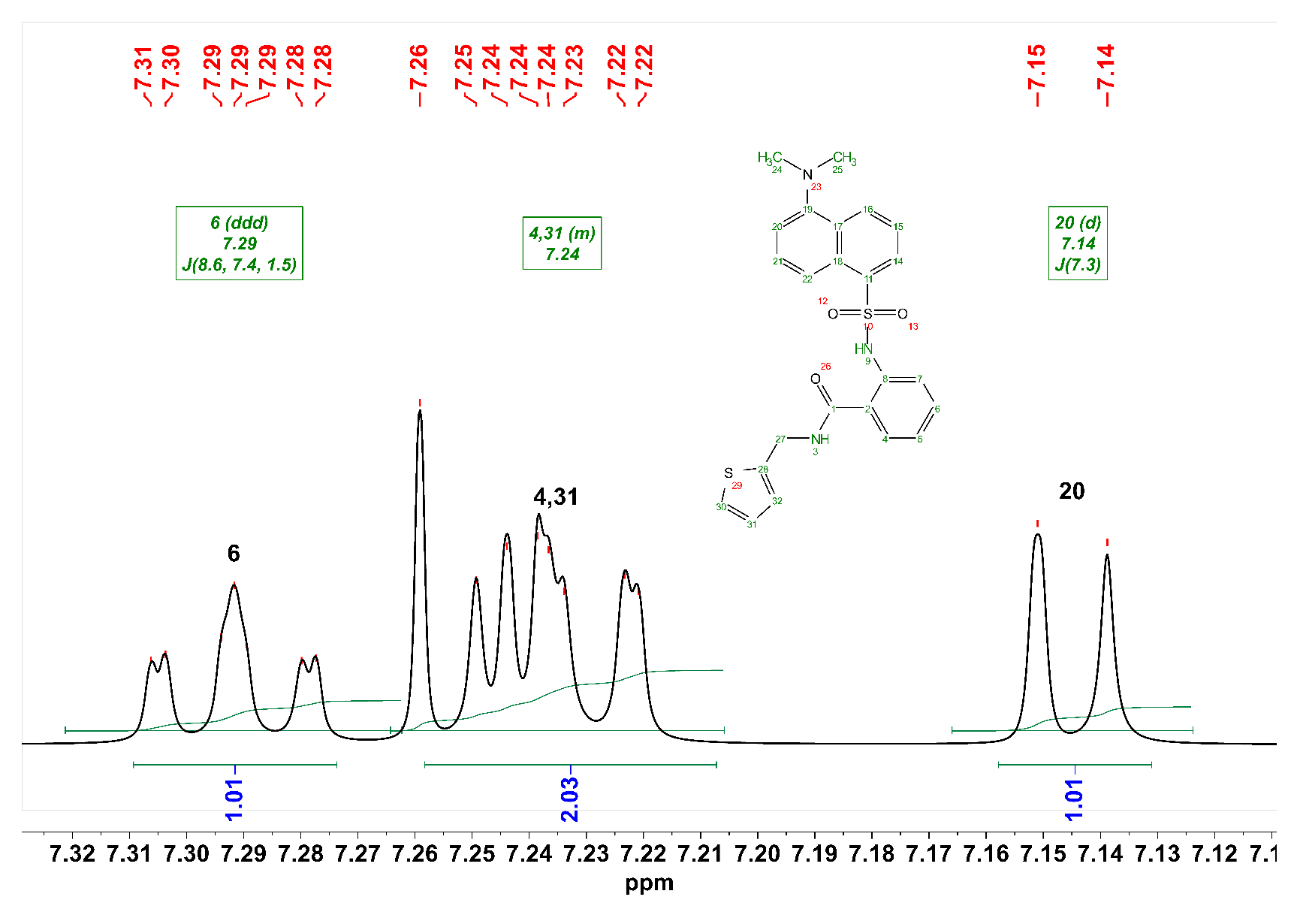


**Figure S6.** 1H NMR spectrum of **L6**.


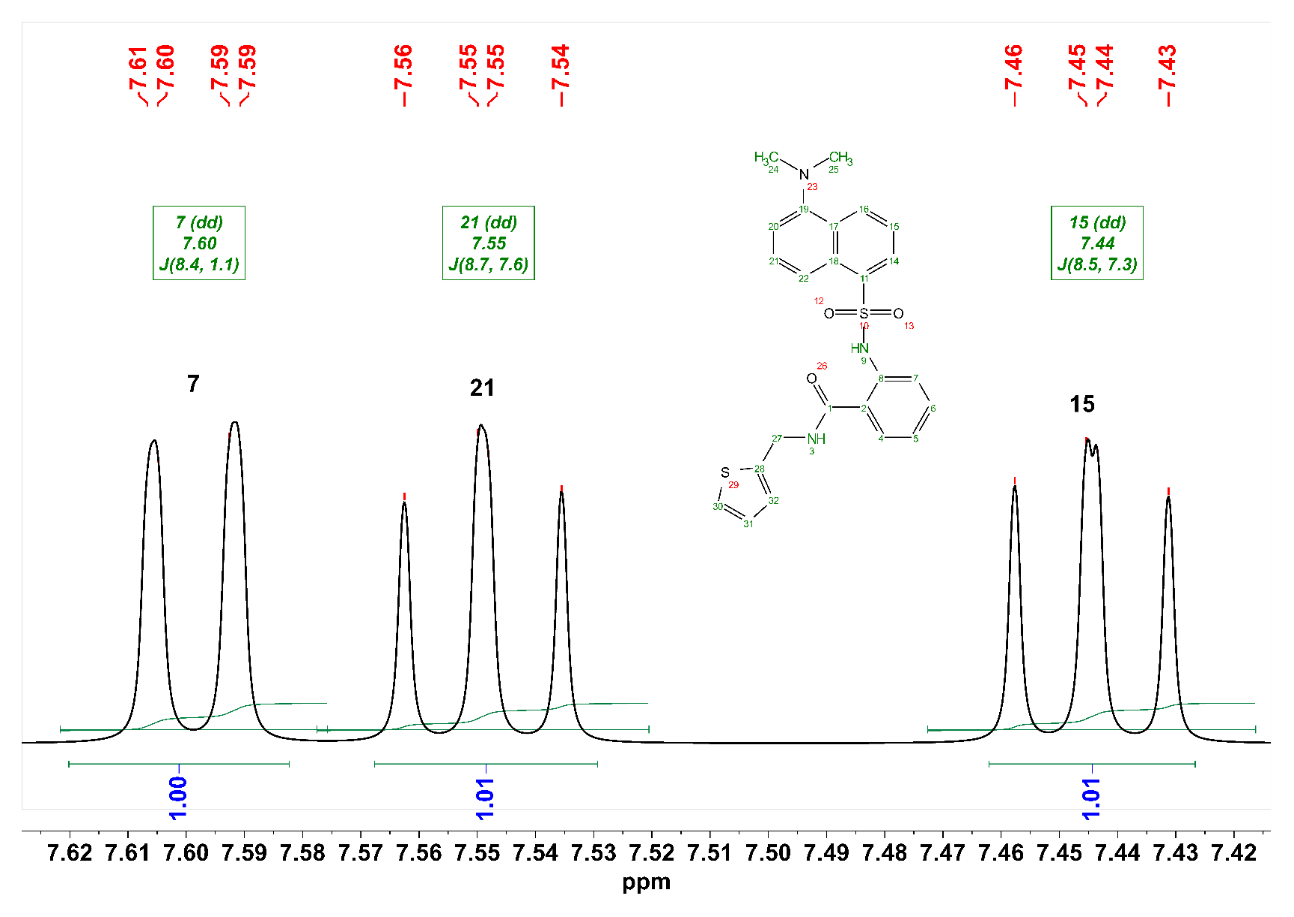


**Figure S6.** 1H NMR spectrum of **L6**.


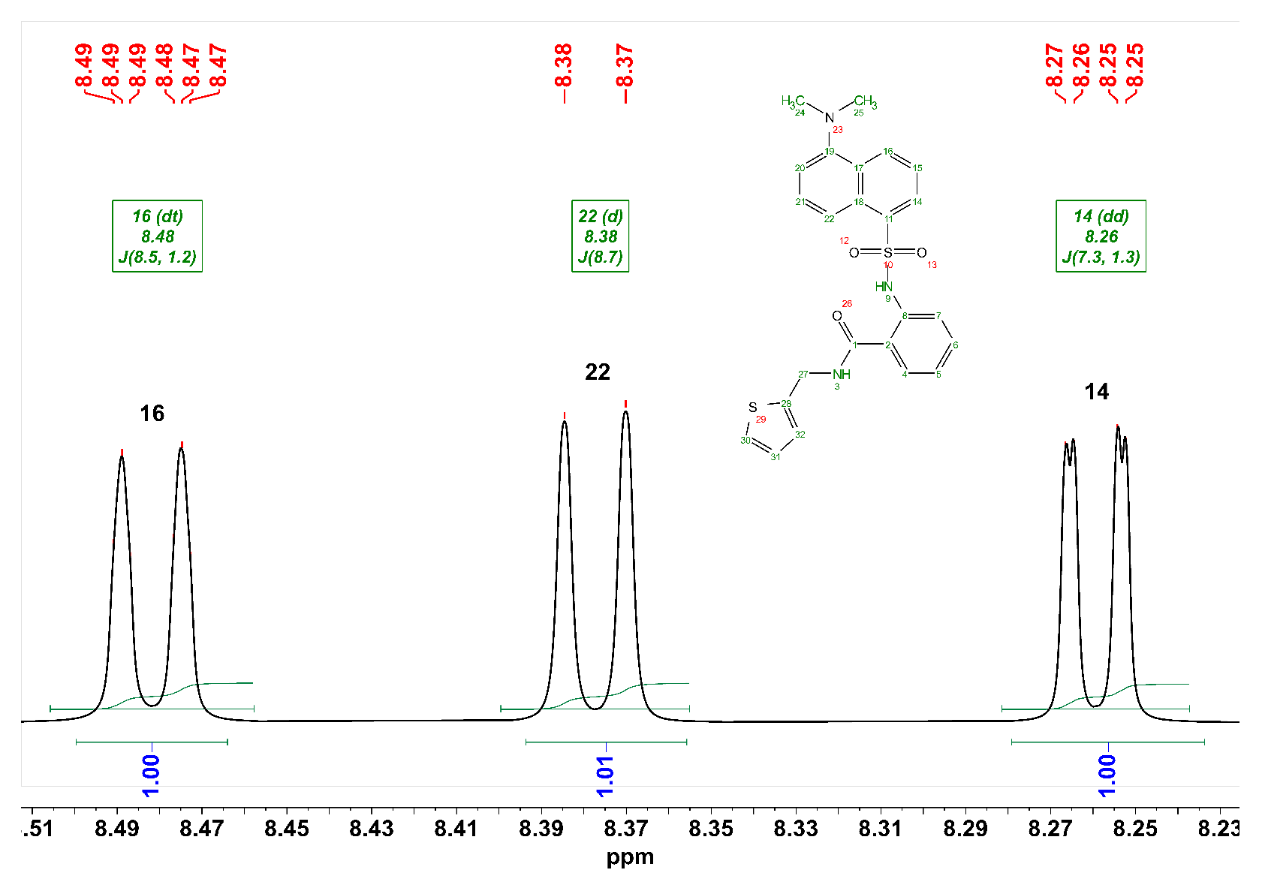


**Figure S6.** 1H NMR spectrum of **L6**.


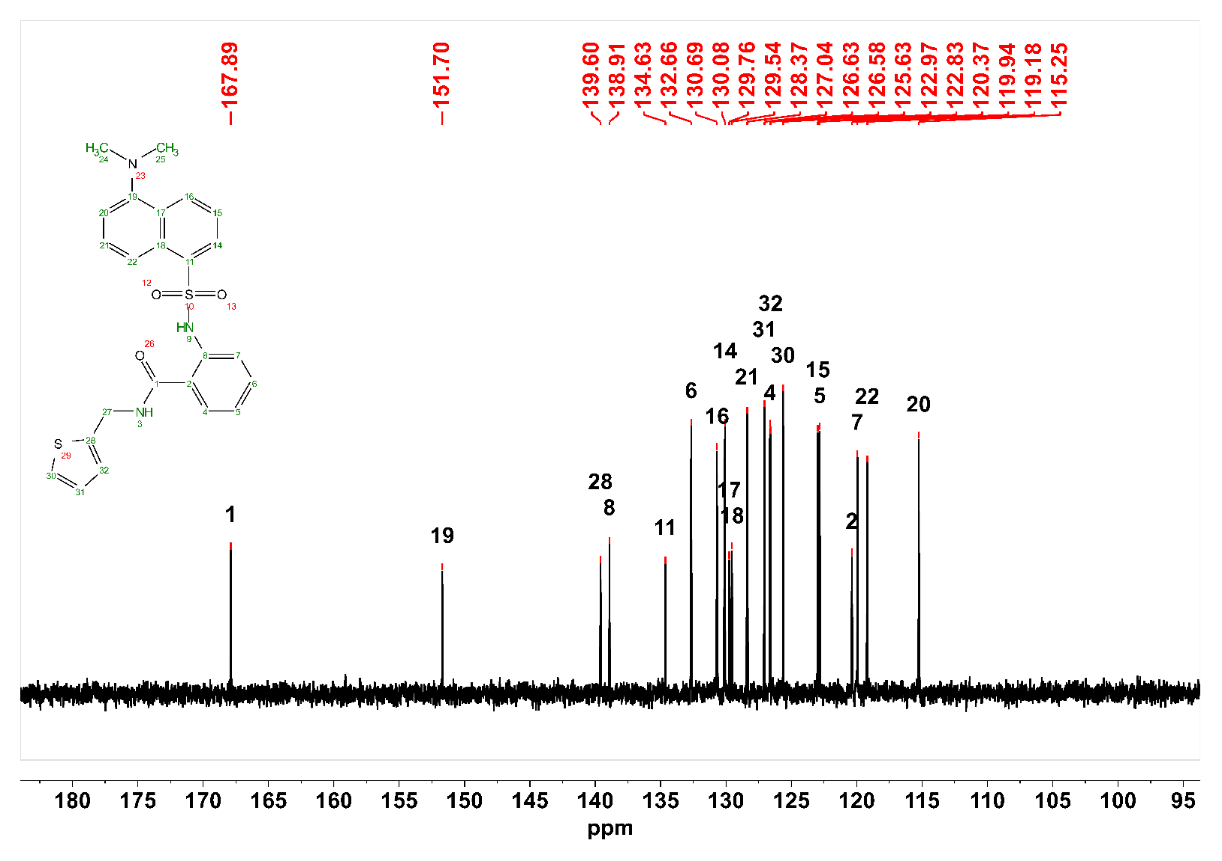


**Figure S6.** 13C NMR spectrum of **L6**.


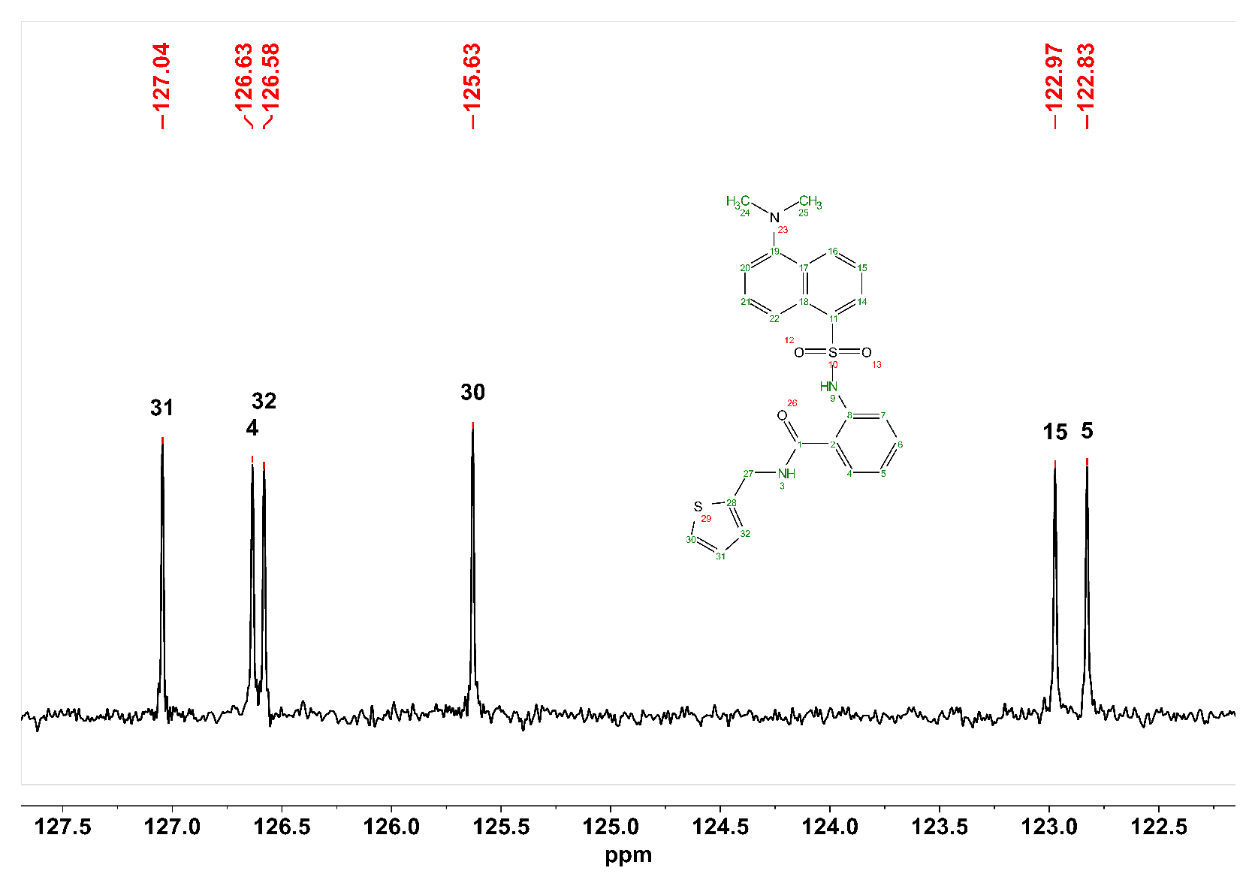


**Figure S6.** 13C NMR spectrum of **L6**.


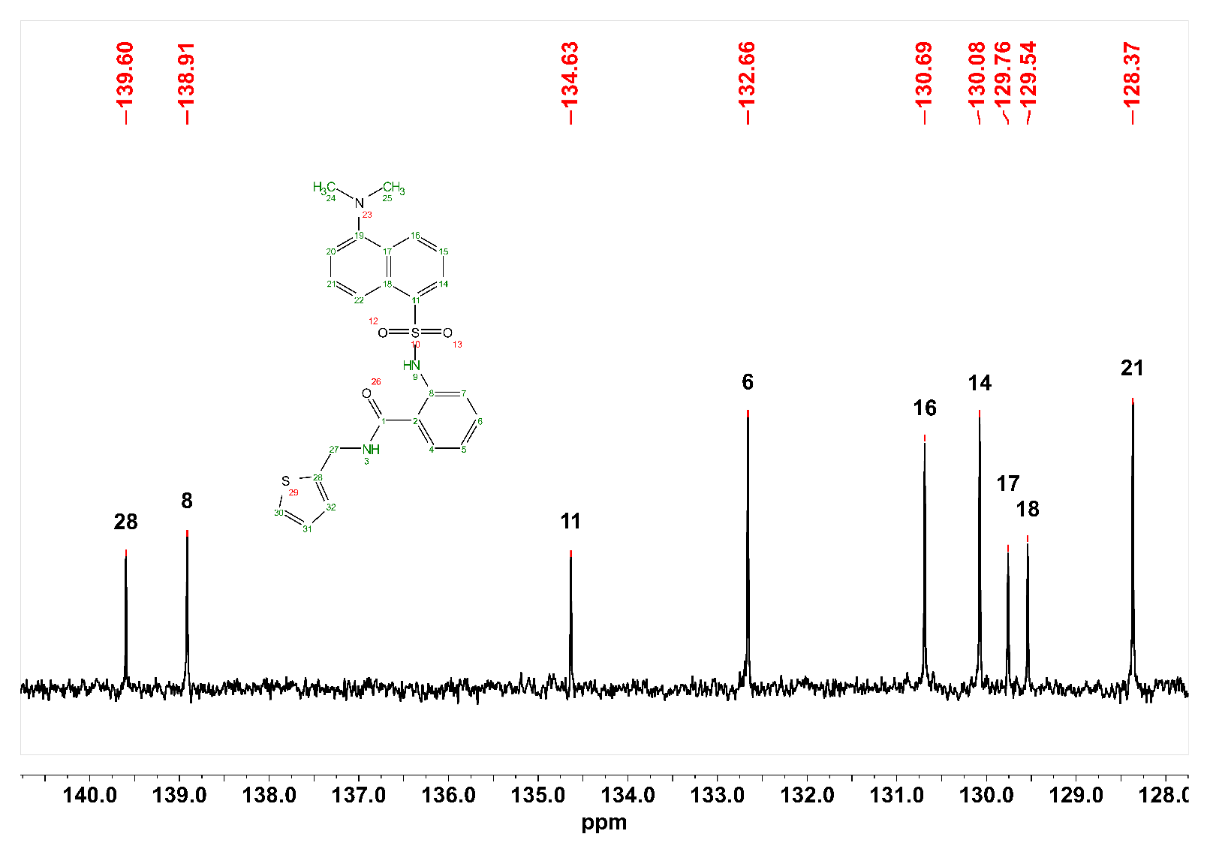


**Figure S6.** 13C NMR spectrum of **L6**.


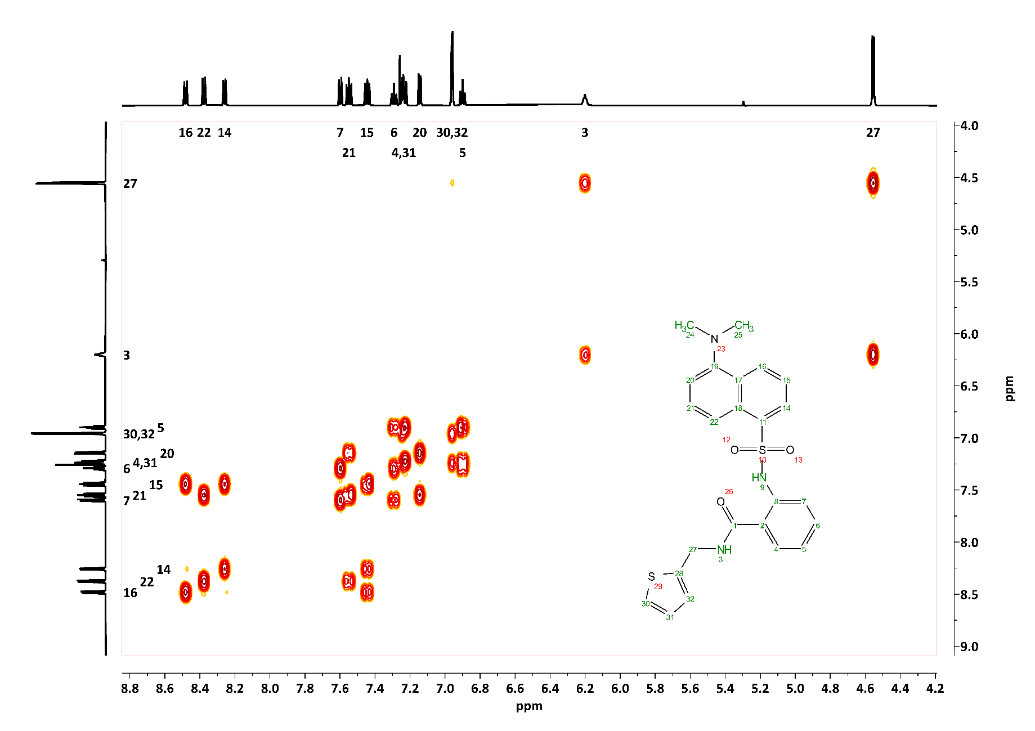


**Figure S6.** COSY NMR spectrum of **L6**.


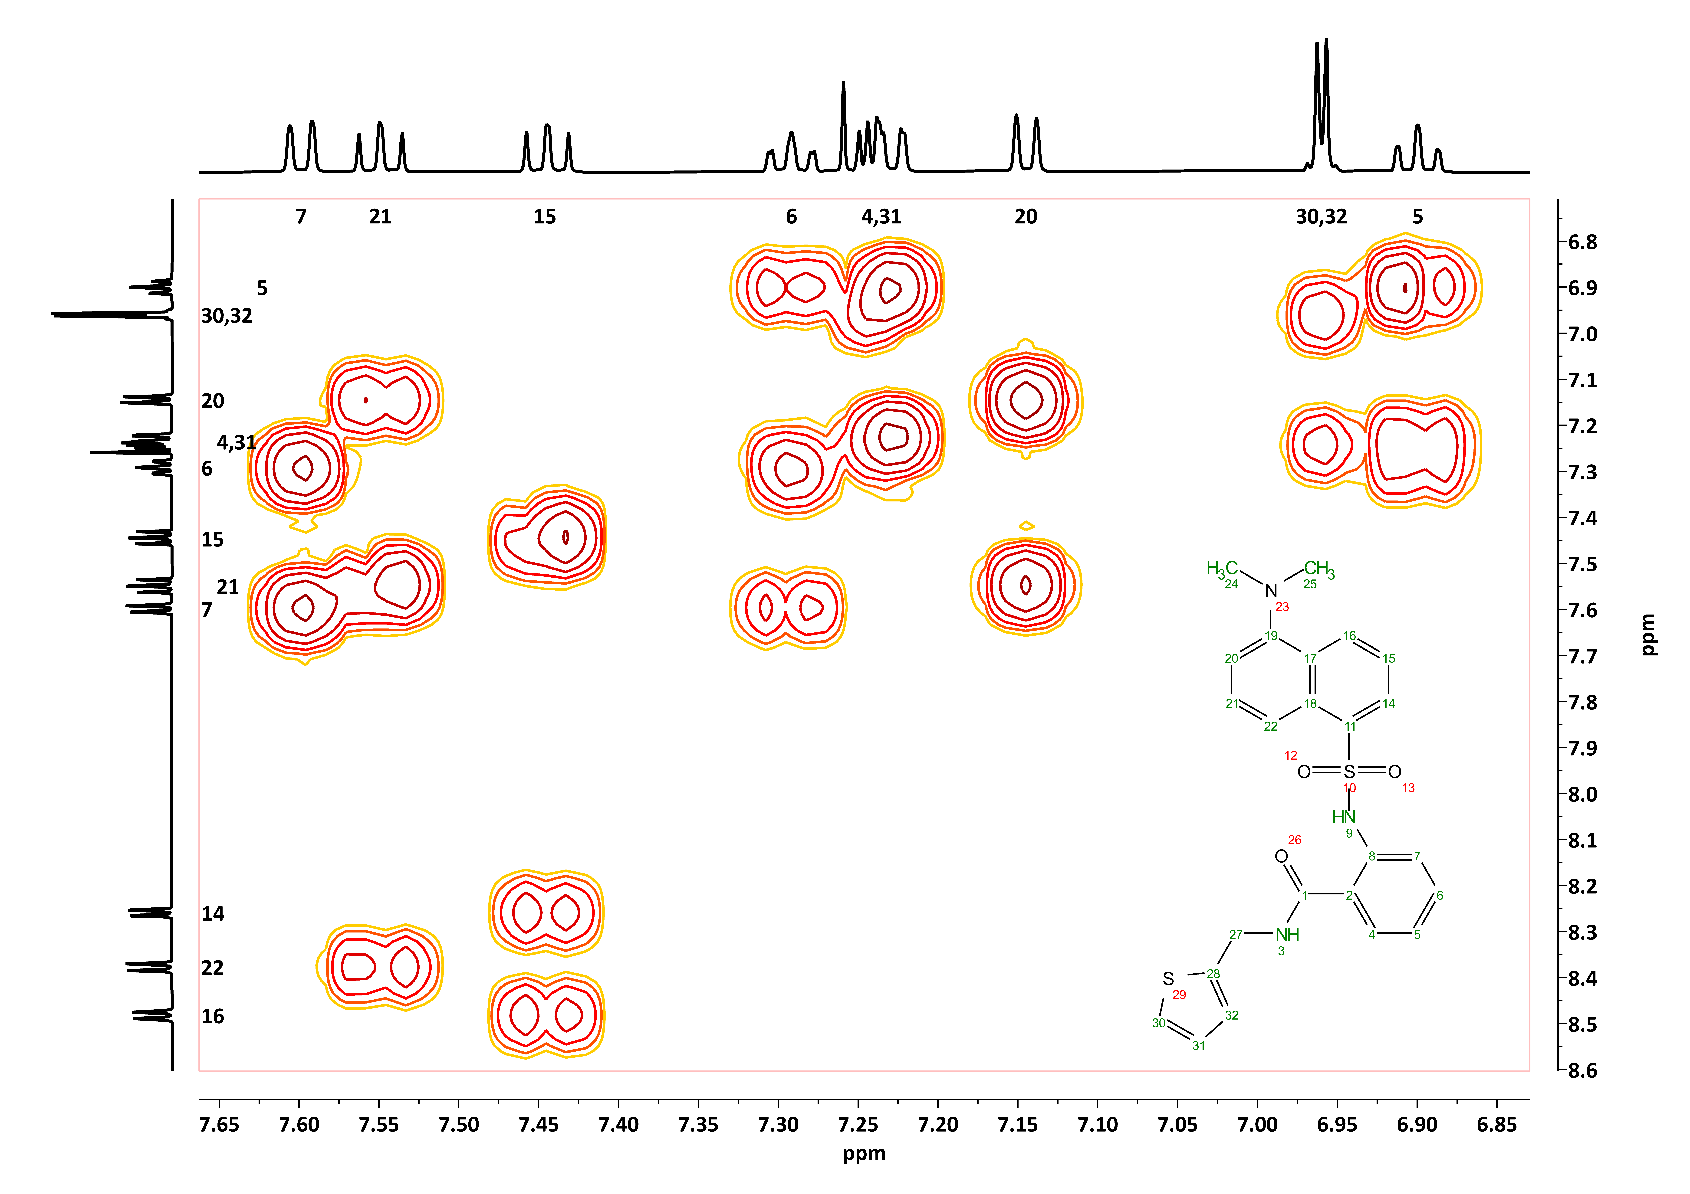


**Figure S6.** COSY NMR spectrum of **L6**.


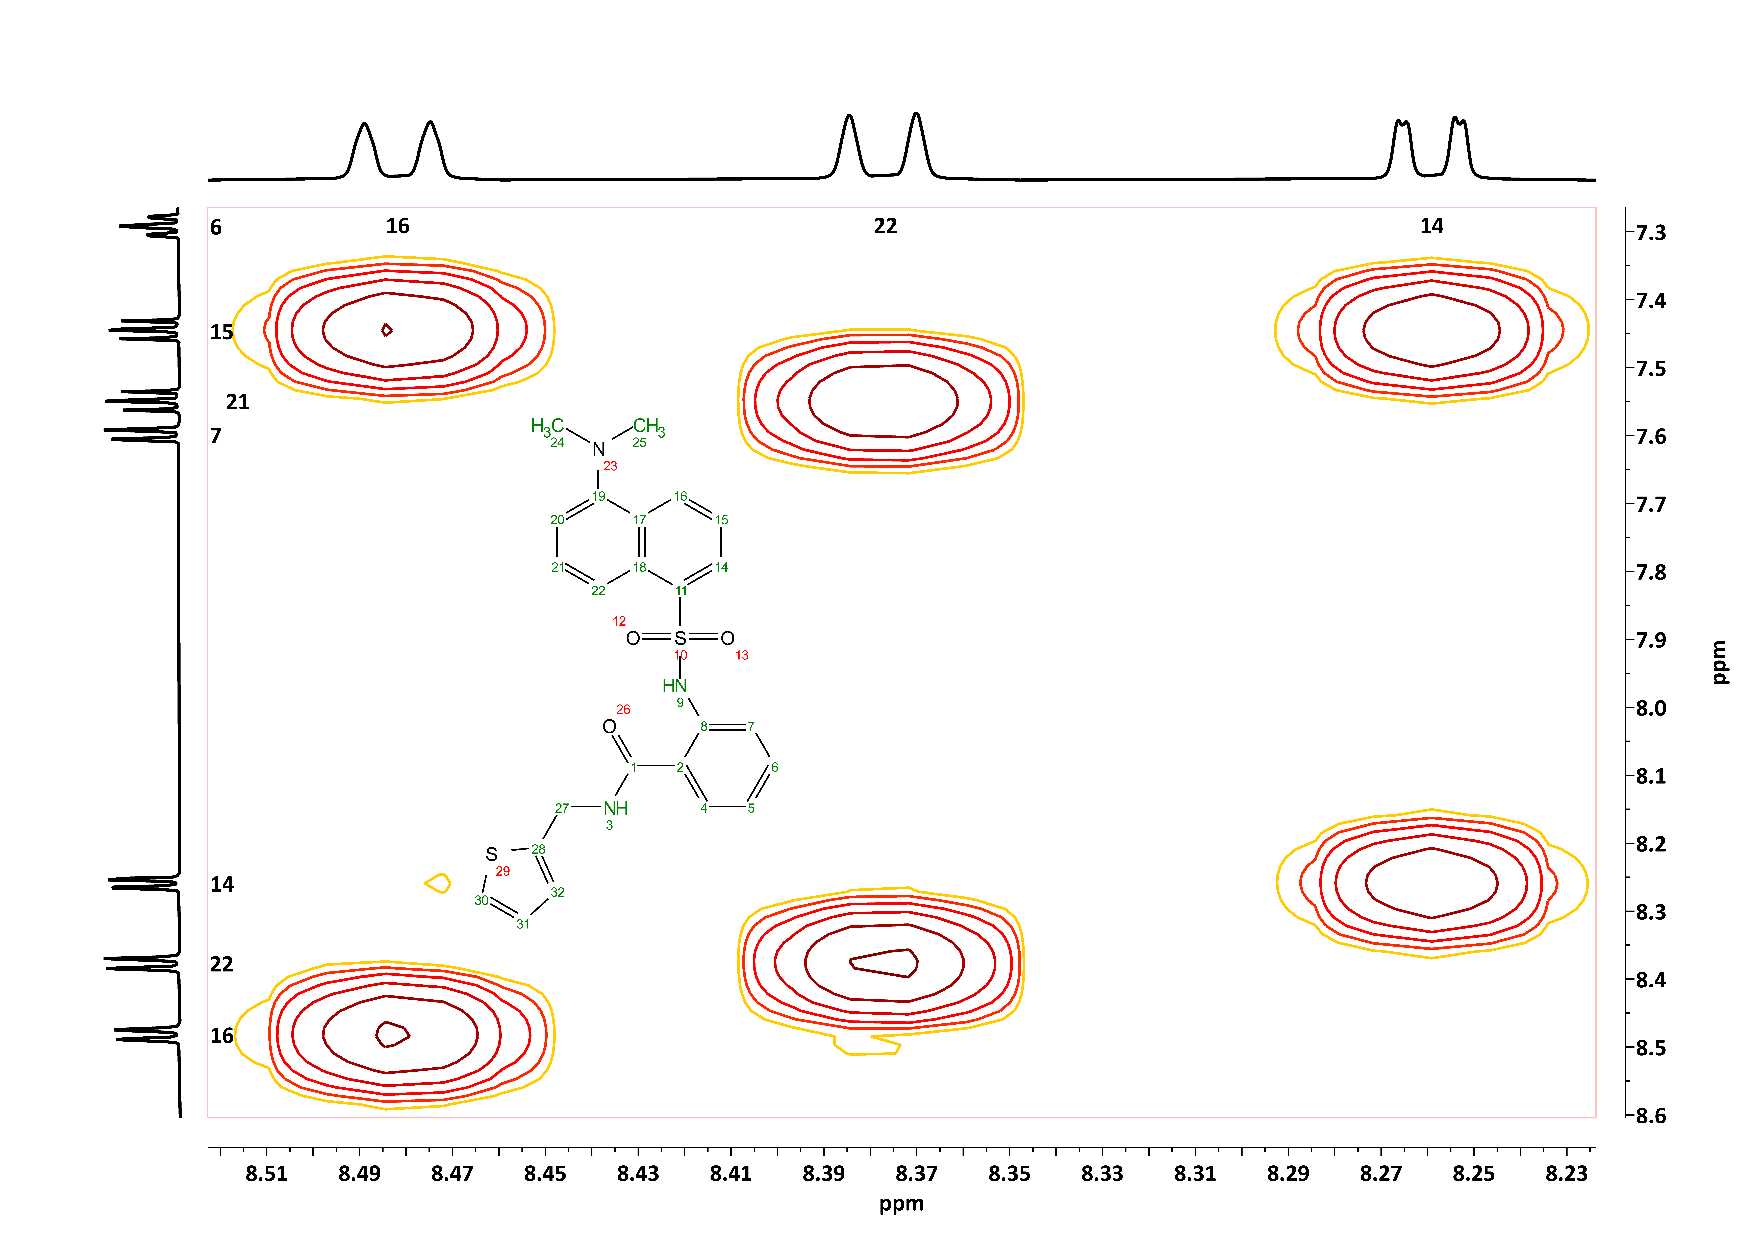


**Figure S6.** COSY NMR spectrum of **L6**.


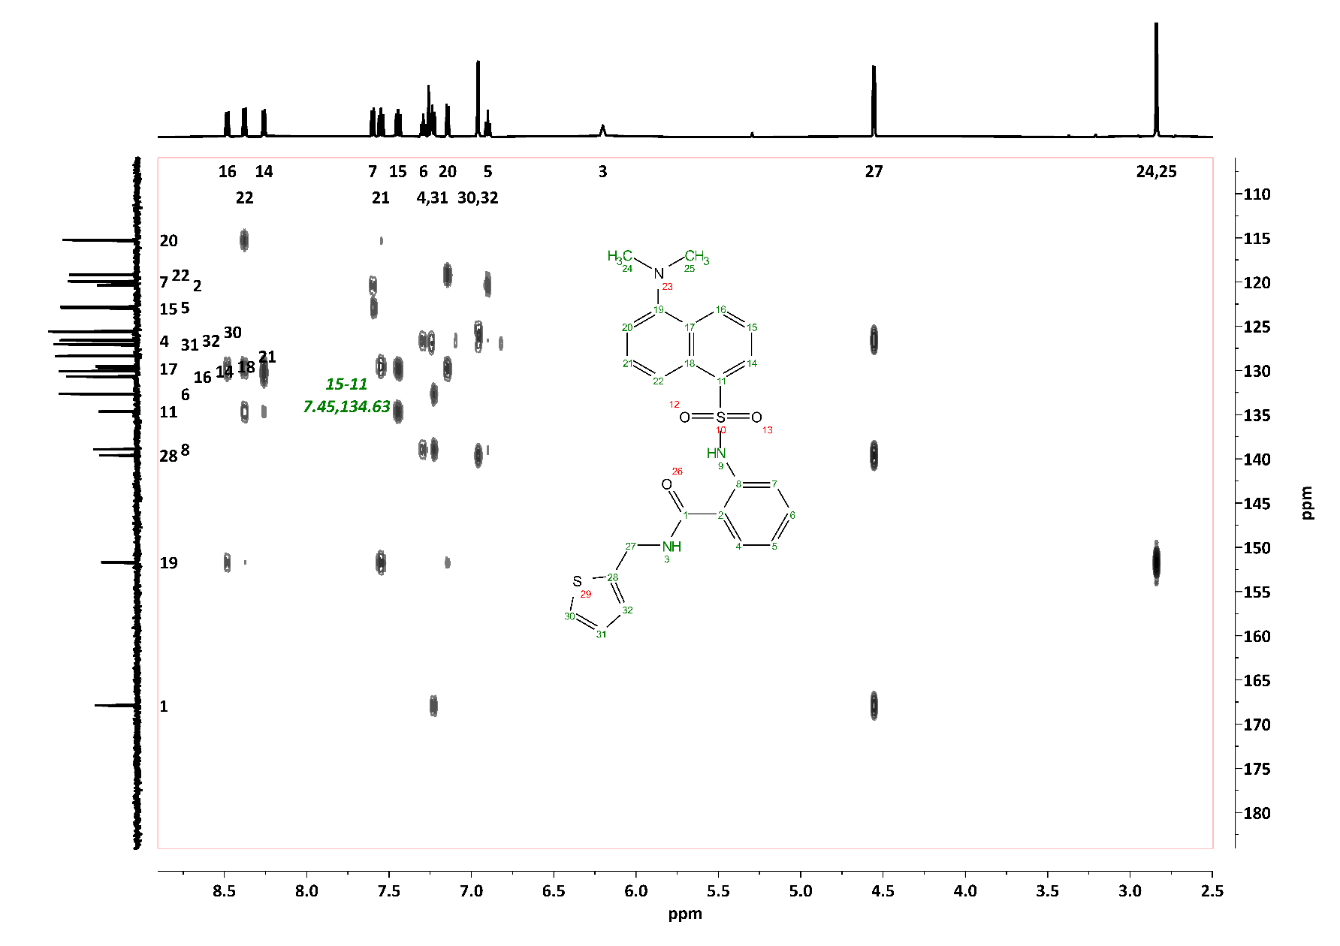


**Figure S6.** HSQC NMR spectrum of **L6**.


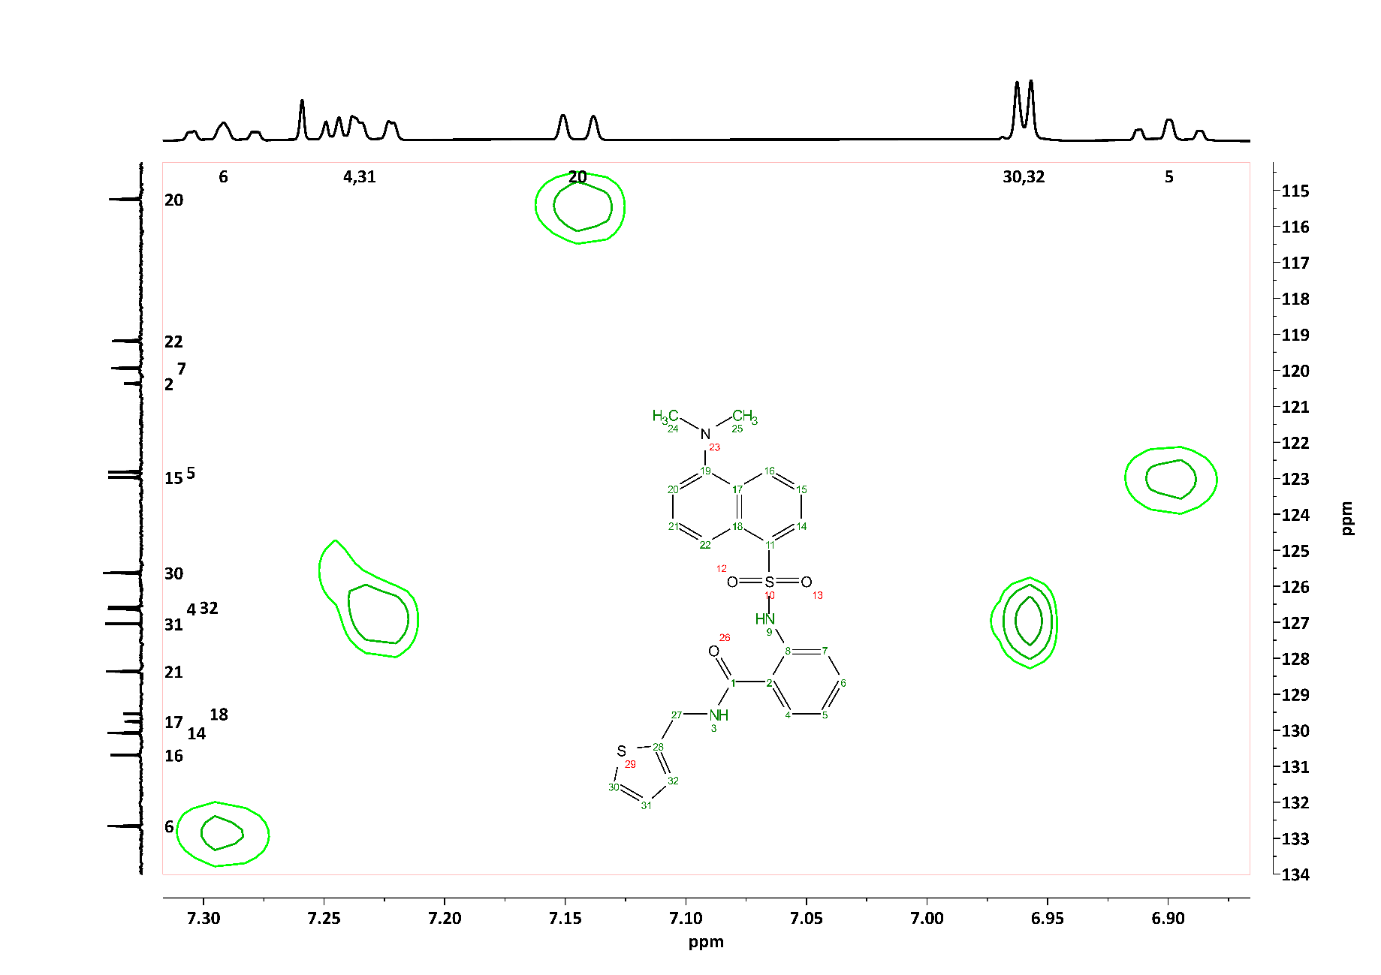


**Figure S6-12.** HSQC NMR spectrum of **L6**.


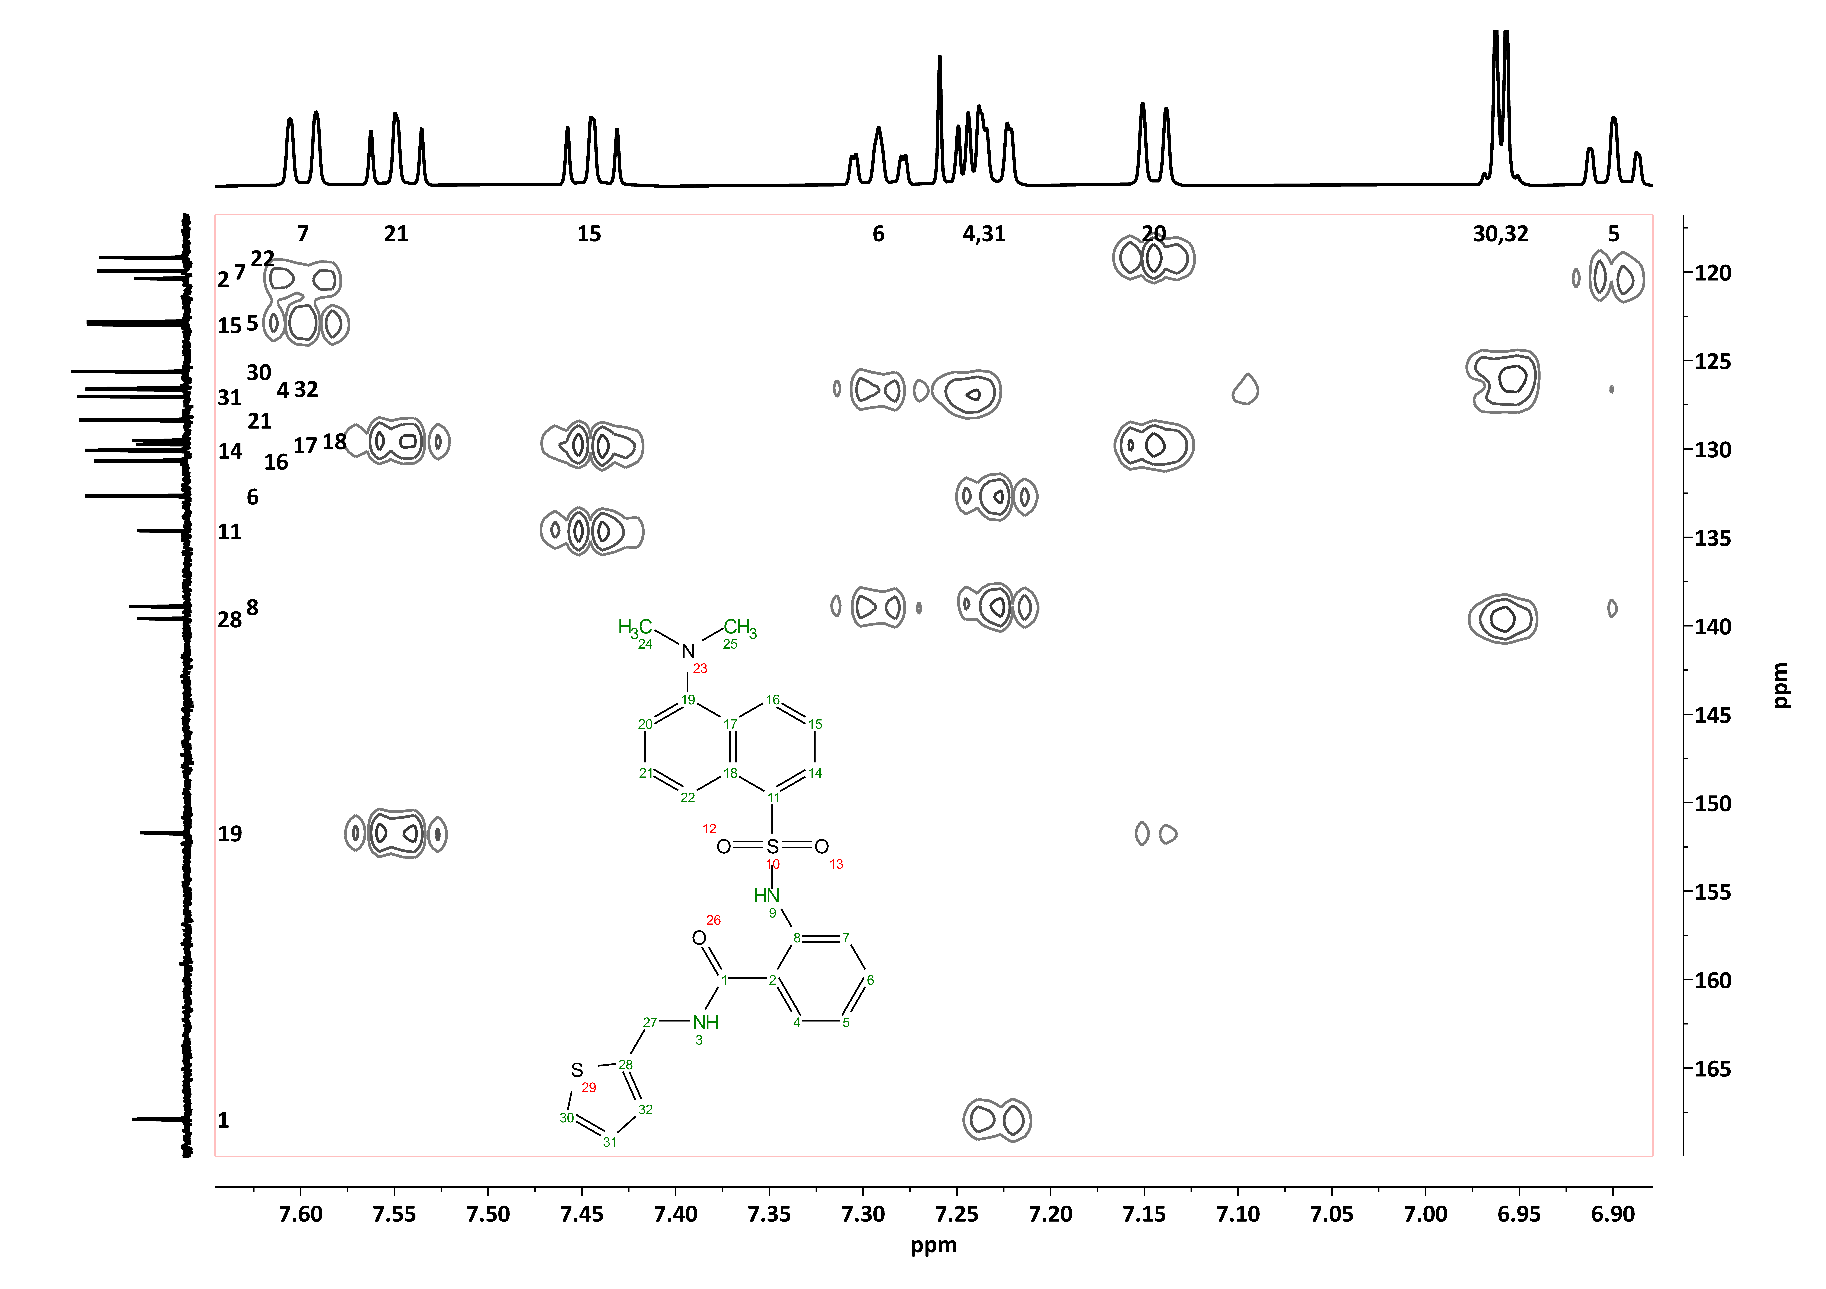


**Figure S6-13.** HSQC NMR spectrum of **L6**.


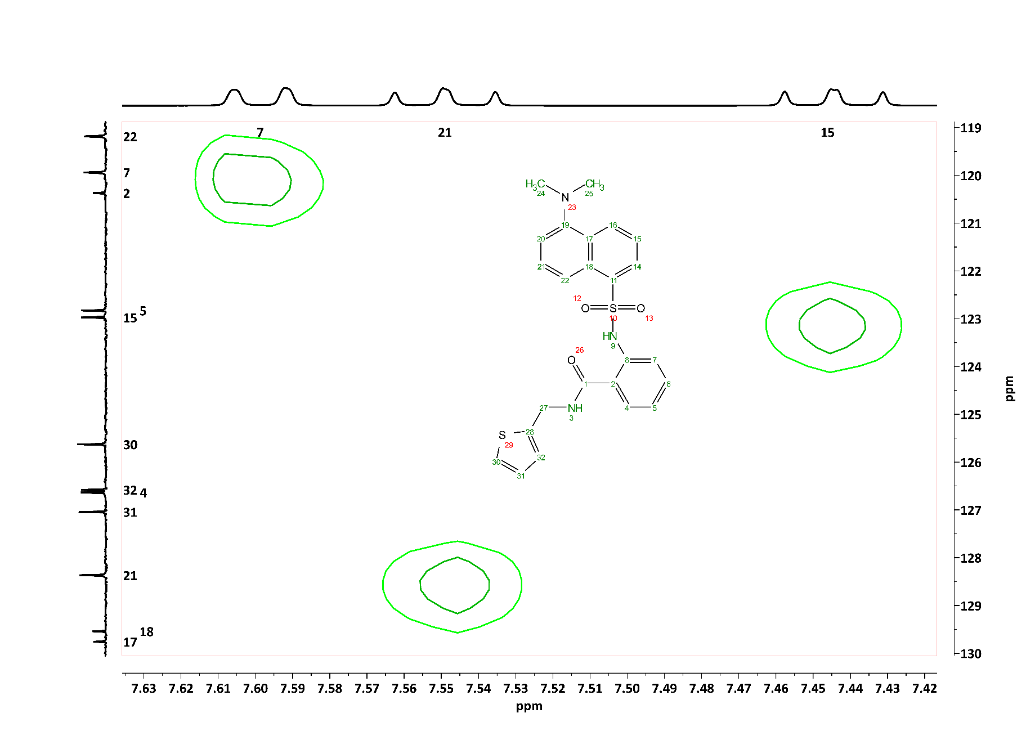


**Figure S6-14.** HSQC NMR spectrum of **L6**.


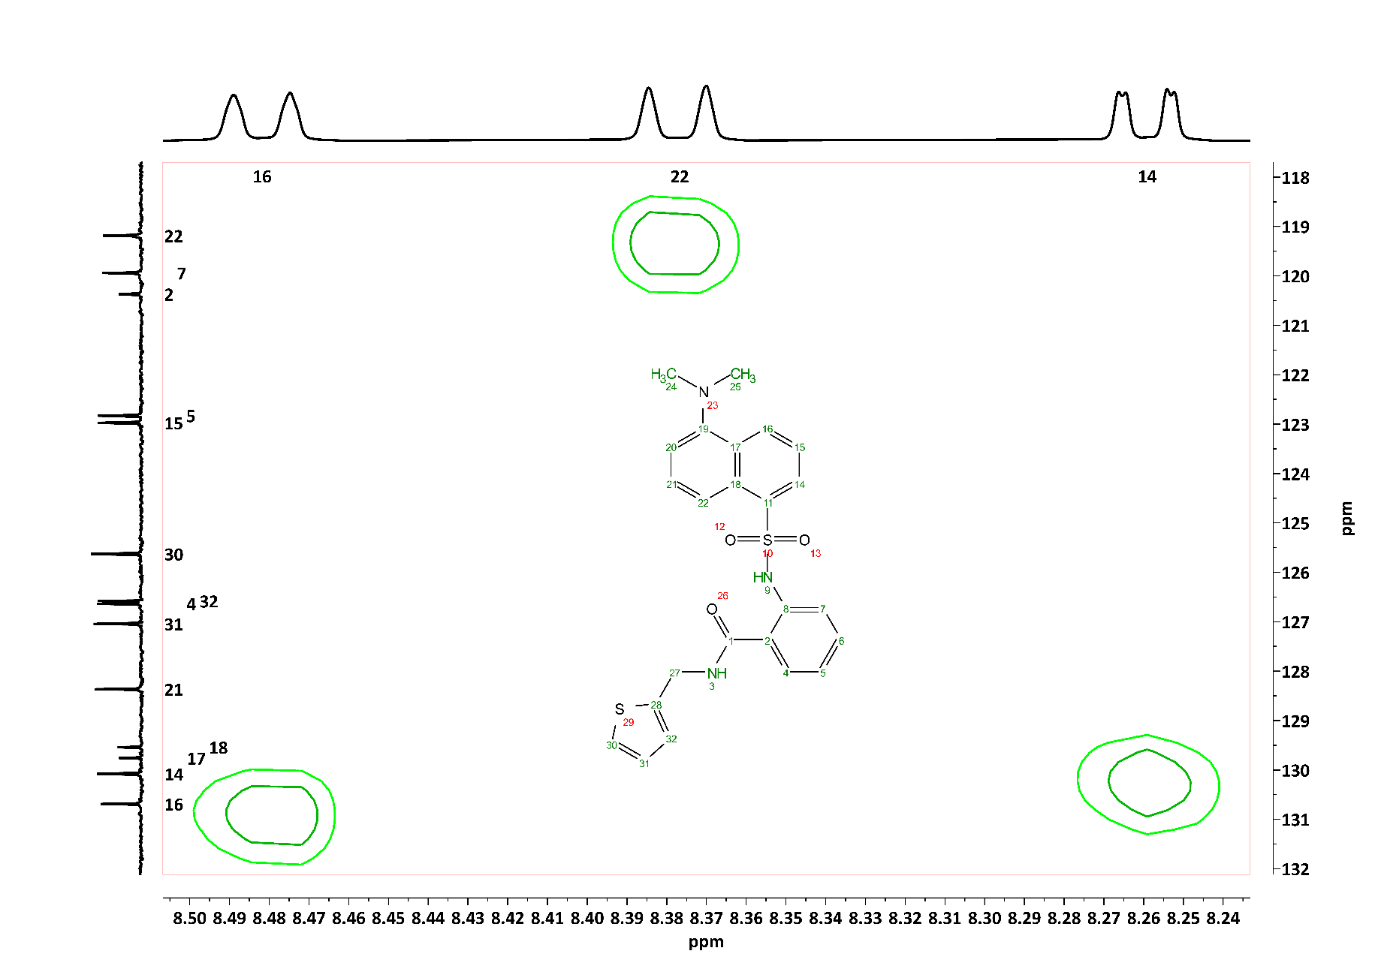


**Figure S6-15.** HSQC NMR spectrum of **L6**.


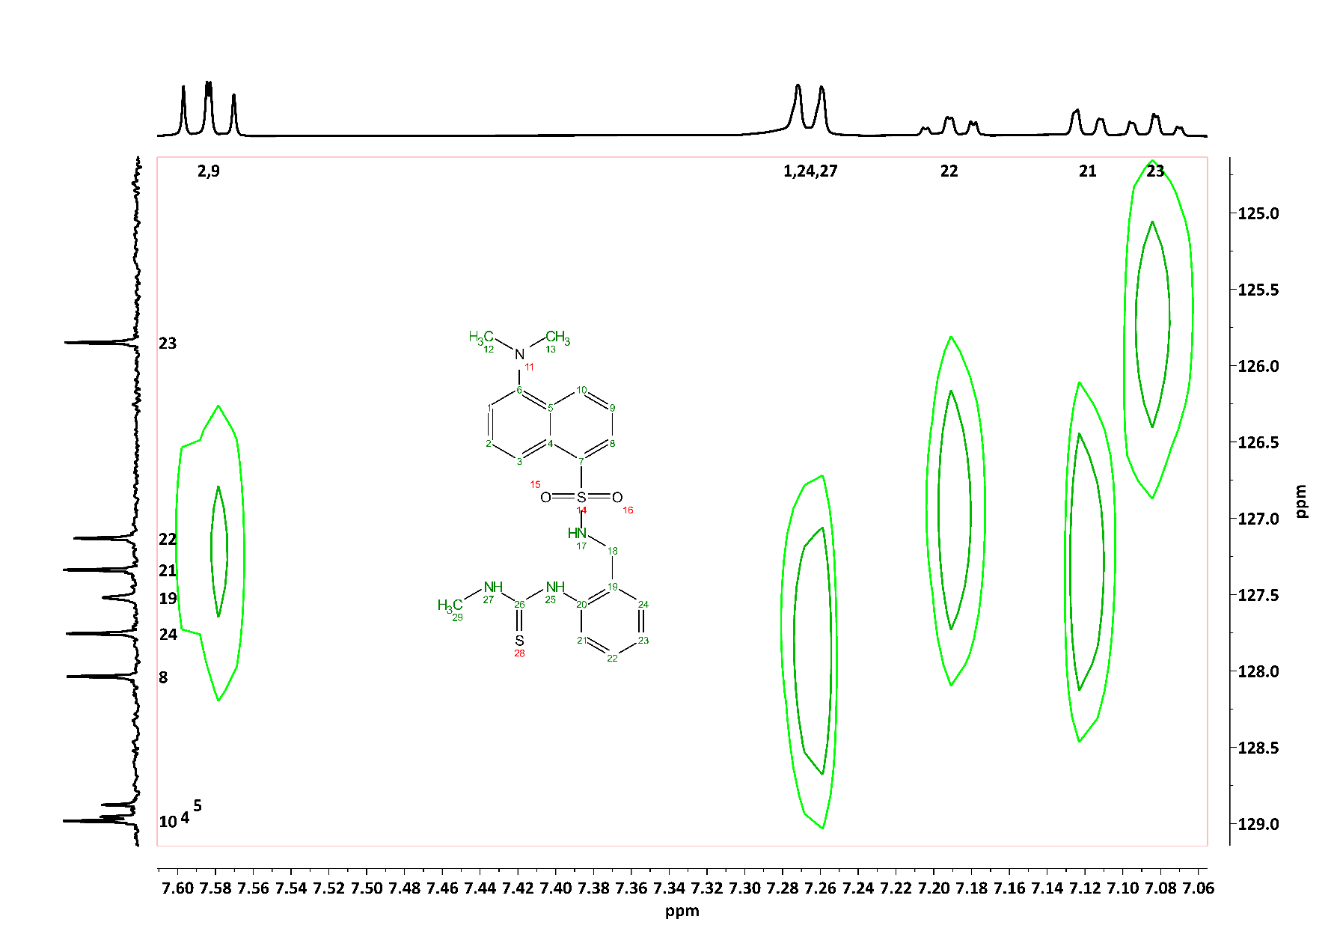


**Figure S6-16.** HSQC NMR spectrum of **L6.**


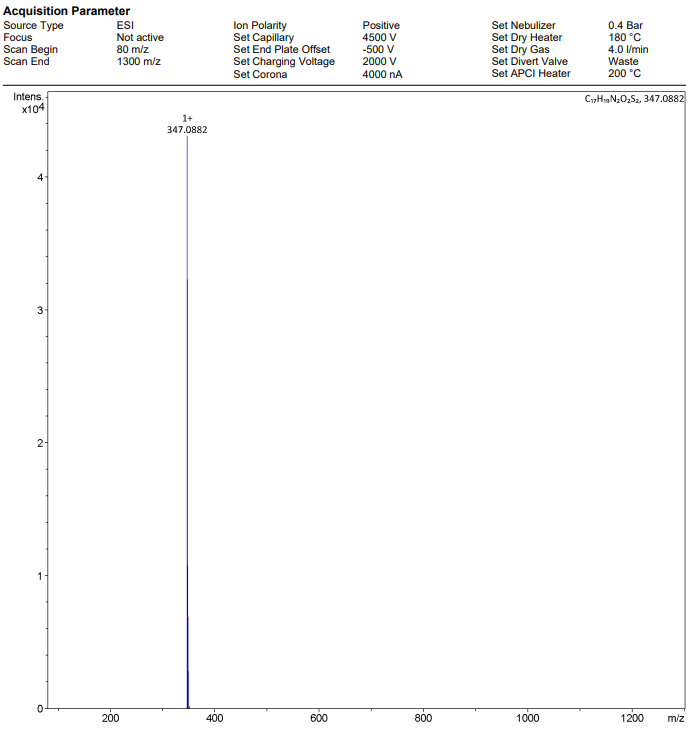
.

**Figure S7-1.** ESI-HRMS spectrum of compound **L1**.


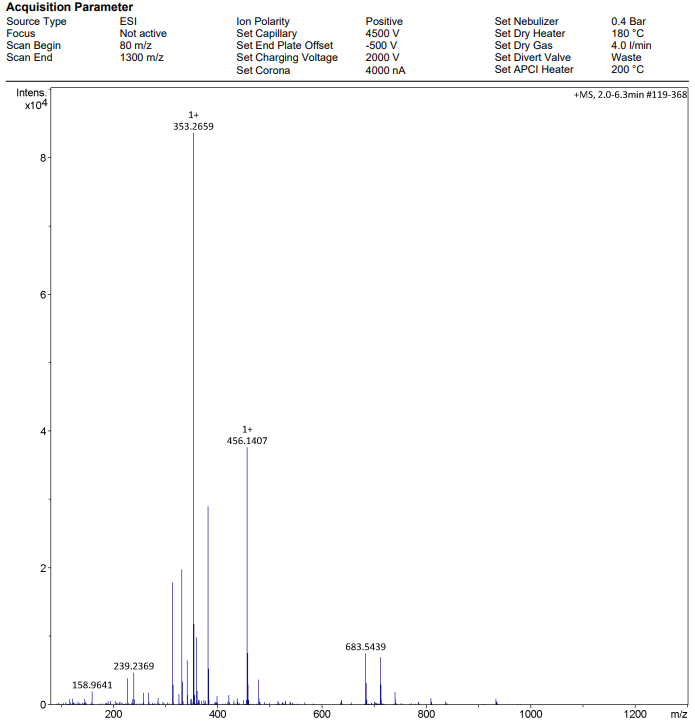


**Figure S7-2.** ESI-HRMS spectrum of compound **L2**.


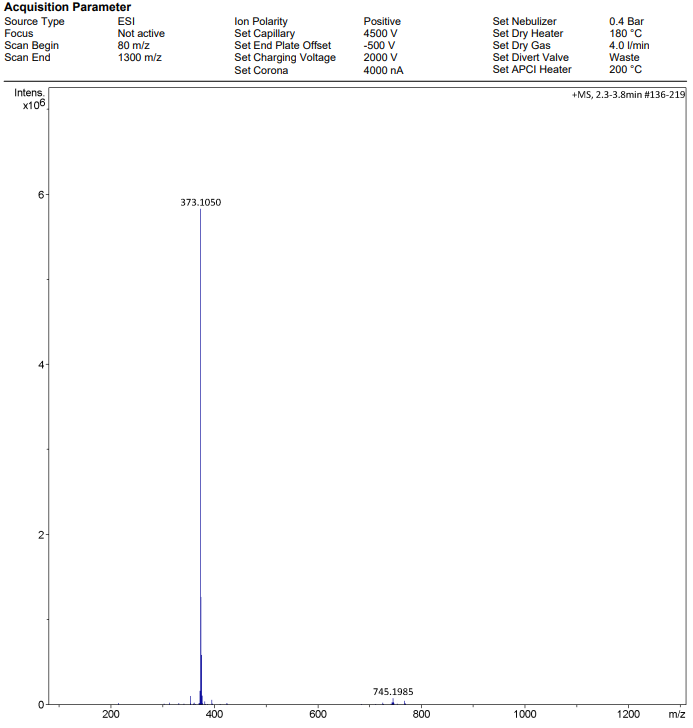


**Figure S7-3.** ESI-HRMS spectrum of compound **L3**.


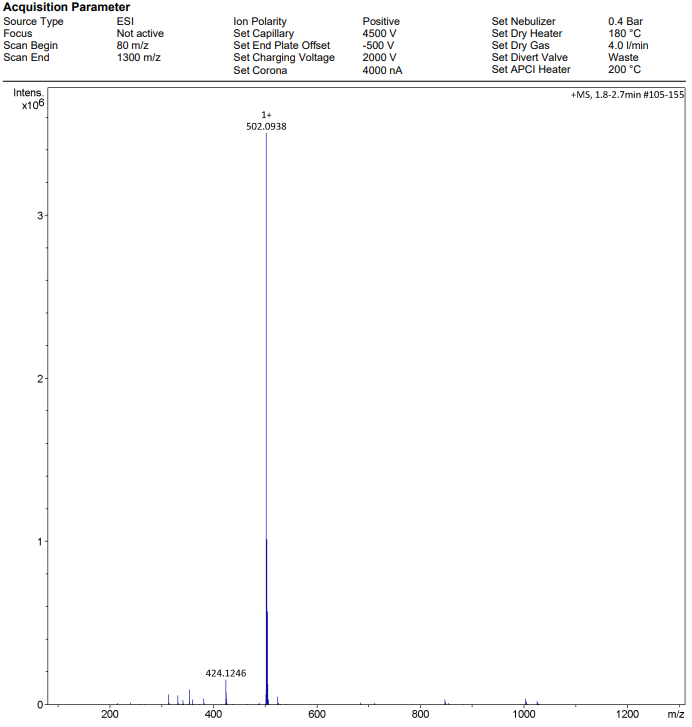


**Figure S7-4.** ESI-HRMS spectrum of compound **L4**.


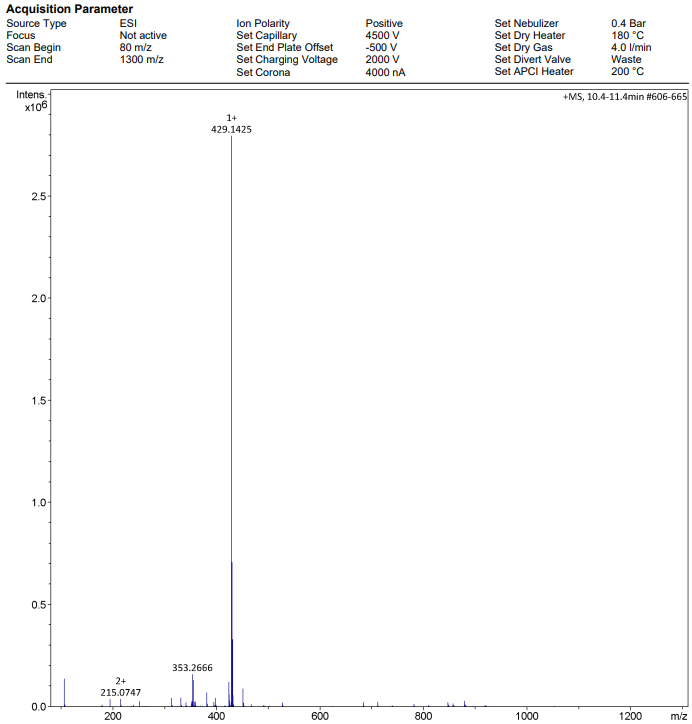


**Figure S7-5.** ESI-HRMS spectrum of compound **L5**.


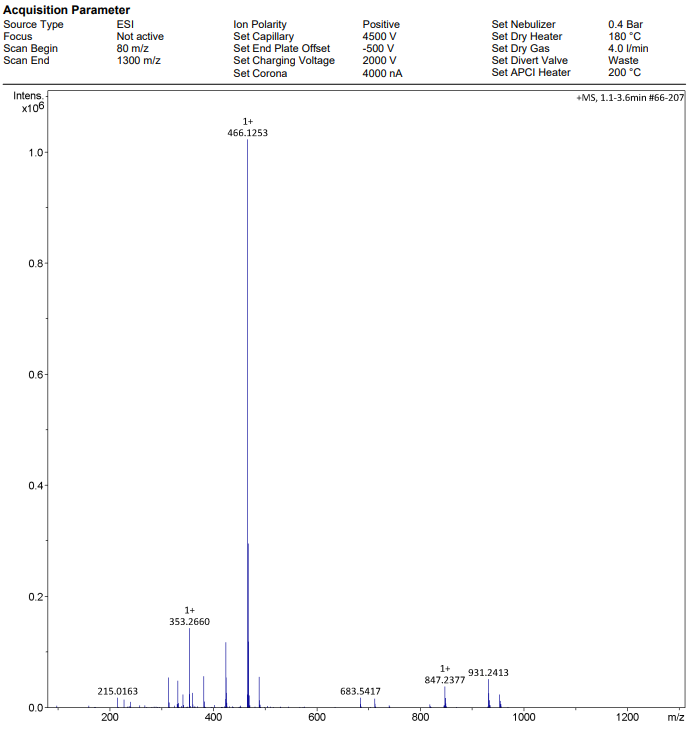


**Figure S7-6.** ESI-HRMS spectrum of compound **L6**.

**Figure S8.** Photophysical characterization of compound L1 in A) CH3CN B) EtOH, C) DMSO, D) THF ([L] = 10 mM) and E) CHCl3 ([L] = 3 mM) λexcL1= 341 nm, T = 298 K.

**Figure S9.** Photophysical characterization of compound L2 in a) CH3CN b) CHCl3, c) DMSO, d) EtOH, e) THF ([L] = 10 mM). λexcL2= 350 nm, T = 298 K.

**Figure S10.** Photophysical characterization of compound L3 in a) CH3CN b) CHCl3, c) DMSO, d) EtOH, e) THF ([L] = 10 mM). λexcL3= 351 nm, T = 298 K.

**Figure S11.** Photophysical characterization of compound L4 in a) CH3CN b) CHCl3, c) DMSO, d) EtOH, e) THF ([L] = 10 mM). λexcL4= 350 nm, T = 298 K.

**Figure S12.** Photophysical characterization of compound L5 in a) CH3CN b) CHCl3, c) DMSO, d) EtOH, e) THF ([L] = 10 mM). λexcL5= 342 nm, T = 298 K.

**Figure S13.** Photophysical characterization of compound L6 in a) CH3CN b) CHCl3, c) DMSO, d) EtOH, e) THF ([L] = 10 mM). λexcL6= 350 nm, T = 298 K.

**Figure S14.** Spectrophotometric and spectrofluorometric titrations of dansyl derivative **L2** with increased additions of Cu2+ (A, B), and Hg2+ (C, D) in CH3CN. The inset represents the absorption (A, C) and emission (B-D) as a function of [Cu2+]/[**L2**] and [Hg2+]/[**L2**], respectively. [**L2**] = 20 µM, λexcL2= 350 nm, T = 298 K).

**Figure S15.** Spectrophotometric and spectrofluorometric titrations of dansyl derivative **L3** with increased additions of Cu2+ (A, B), and Hg2+ (C, D) in CH3CN. The inset represents the absorption (A, C) and emission (B-D) as a function of [Cu2+]/[**L3**] and [Hg2+]/[**L3**], respectively. [**L3**] = 20 µM, λexcL3= 352 nm, T = 298 K).

**Figure S16.** Spectrophotometric and spectrofluorometric titrations of dansyl derivative **L4** with increased additions of Cu2+ (A, B), and Hg2+ (C, D) in CH3CN. The inset represents the absorption (A, C) and emission (B-D) as a function of [Cu2+]/[**L4**] and [Hg2+]/[**L4**], respectively. [**L4**] = 20 µM, λexcL4= 348nm, T = 298 K).


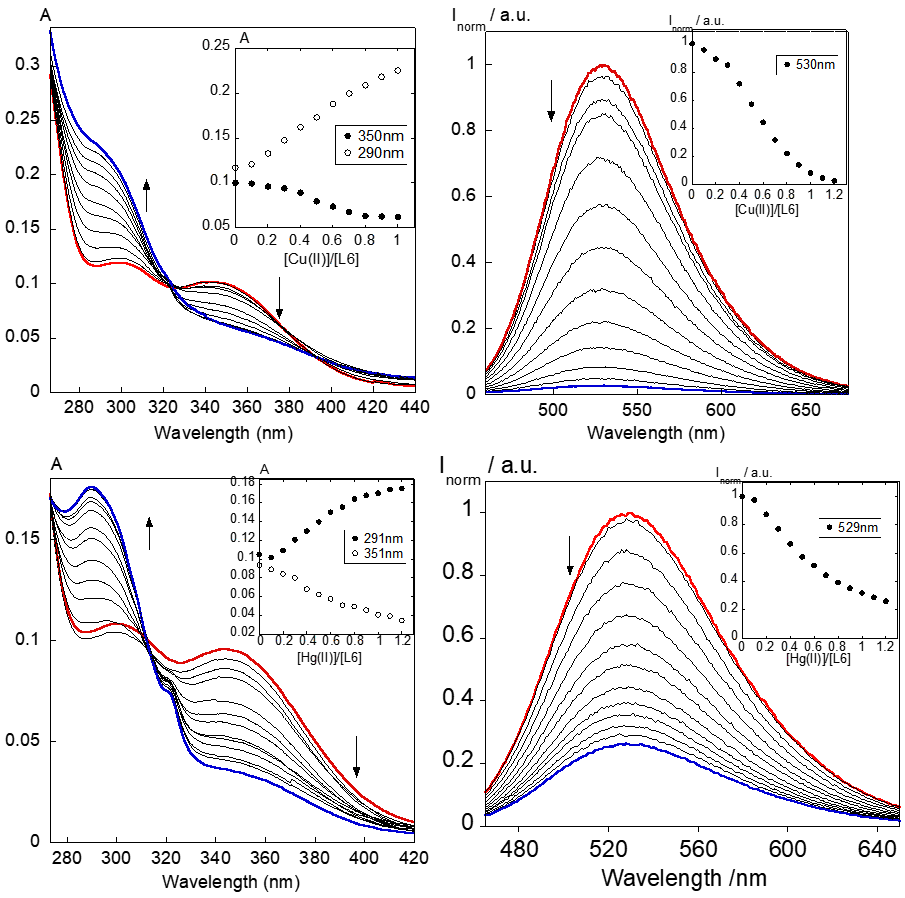


**Figure S17.** Spectrophotometric and spectrofluorometric titrations of dansyl derivative **L6** with increased additions of Cu2+ (A, B), and Hg2+ (C, D) in CH3CN. The inset represents the absorption (A, C) and emission (B-D) as a function of [Cu2+]/[**L6**] and [Hg2+]/[**L6**], respectively. [**L6**] = 20 µM, λexcL6= 350 nm, T = 298 K).

**Figure S18.** Maximum emission intensities of **L2** A), **L3** (B), **L4** (C), **L6** (D) upon the addition of 1, 2 and 10 equivalents of Ag+, Cd2+, Cu2+,Hg2+, Zn2+metal ions. ([**L**] = 20 μM, λem**L2**= 527 nm, λem**L3** = 521 nm , λem**L4** = 530 nm, λem**L6** = 532 nm T = 298 K). λexcL2= 350 nm, λexcL3= 352 nm, λexcL4= 348nm, λexcL6= 350 nm.

**Figure S19.** Spectrophotometric and spectrofluorometric titrations of dansyl derivative L2 with increased additions of HCl (A, B), and ammonia (C, D) in CH3CN. [L2] = 20 µM, λexcL2=350 nm, T = 298 K).

**Figure S20.** Spectrophotometric and spectrofluorometric titrations of dansyl derivative L4 with increased additions of HCl (A, B), and ammonia (C, D) in CH3CN. [L4] = 20 µM, λexcL4=348 nm, T = 298 K).

**Figure S21.** Spectrophotometric and spectrofluorometric titrations of dansyl derivative L5 with increased additions of HCl (A, B), and ammonia (C, D) in CH3CN. [L5] = 20 µM, λexcL5=340 nm, T = 298 K).

**Figure S22.** Spectrophotometric and spectrofluorometric titrations of dansyl derivative L6 with increased additions of HCl (A, B), and ammonia (C, D) in CH3CN. [L6] = 20 µM, λexcL6=350 nm, T = 298 K).

**Figure S23.** (A, C, E, G) Emission spectra of successive immersion of L2, L4, L5, L6 doped PMMA polymer film in a conc. HCl solution (5m in 5min) (B, D, F, H) Emission spectra of exposure to HCl vapors (20m in 20m) of L2, L4, L5 and L6 doped PMMA polymers. λexcL2= 350 nm, λexcL4= 348 nm, λexcL5= 342nm, λexcL6= 350 nm. T=298K.

**Figure S24.** Emission spectra of L2 (A), L4 (B), L5 (C) and L6(D)immersion in the HCl concentrations from 0 to 12 M. λexcL2= 350 nm, λexcL4= 348 nm, λexcL5= 342nm, λexcL6= 350 nm. T=298K.

**Figure S25.** Emission intensity of L1@PMMA (A), L2@PMMA (B), L4@PMMA (C), L5@PMMA (D) and L6@PMMA after successive cycles of HCl/NH3 immersion. λexcL1= 341 nm, λexcL2= 350 nm, λexcL4= 348 nm, λexcL5= 342nm, λexcL6= 350 nm. T=298K.
